# Supplementary material
Source: publisher site journal article supplement (https://www.dovepress.com/article/372300)
Supplement: Supplementary file 1 [file get_supplementary_file.php]

**Content of supplemetary materials**

[***S1. PRISMA NMA Checklist of Items to Include When Reporting A Systematic Review Involving a Network Meta-analysis 2***](#_Toc17588)

[***S2. Diagnostic criteria of Alcohol use disorder 7***](#_Toc30948)

[***S3. Treatment modalities 10***](#_Toc20327)

[***S4. Literature search strategy 18***](#_Toc23706)

[***S5. Trial characteristics 31***](#_Toc1279)

[***S6. Risk of bias assessment 52***](#_Toc21824)

[***S7. Pairwise meta-analysis 68***](#_Toc7130)

[***S8. Ranking probabilities, mean ranks, SUCRA values 72***](#_Toc9959)

[***S9. Forest plot 78***](#_Toc6753)

[***S10. Network plot 87***](#_Toc11905)

[***S11. Network meta-analysis 89***](#_Toc24871)

[***S12. Results of GRADE Rating 94***](#_Toc3099)

[***S13. Inconsistency test 114***](#_Toc21179)

[***S14. Small-study effects (funnel plots) 122***](#_Toc14290)

[***Reference 126***](#_Toc28500)

**S**[**1.**](#_Toc6257) **PRISMA NMA Checklist of Items to Include When Reporting A Systematic Review Involving a Network Meta-analysis**

**S**[**1**](#_Toc6257) **Table** PRISMA NMA Checklist

| **Section/Topic** | **Item #** | **Checklist Item** | **Reported on Page #** |
| --- | --- | --- | --- |
| **TITLE** |  |  |  |
| Title | 1 | Identify the report as a systematic review *incorporating a network meta-analysis (or related form of meta-analysis).* | ***1*** |
|  |  |  |  |
| **ABSTRACT** |  |  |  |
| Structured summary | 2 | Provide a structured summary including, as applicable:  **Background:** main objectives  **Methods:** data sources; study eligibility criteria, participants, and interventions; study appraisal; and *synthesis methods, such as network meta-analysis.*  **Results:** number of studies and participants identified; summary estimates with corresponding confidence/credible intervals; *treatment rankings may also be discussed. Authors may choose to summarize pairwise comparisons against a chosen treatment included in their analyses for brevity.*  **Discussion/Conclusions:** limitations; conclusions and implications of findings.  **Other:** primary source of funding; systematic review registration number with registry name. | 2-3 |
|  |  |  |  |
| **INTRODUCTION** |  |  |  |
| Rationale | 3 | Describe the rationale for the review in the context of what is already known*, including mention of why a network meta-analysis has been conducted.* | ***3-4*** |
| Objectives | 4 | Provide an explicit statement of questions being addressed, with reference to participants, interventions, comparisons, outcomes, and study design (PICOS). | 3-4 |
|  |  |  |  |
| **METHODS** |  |  |  |
| Protocol and registration | 5 | Indicate whether a review protocol exists and if and where it can be accessed (e.g., Web address); and, if available, provide registration information, including registration number. | 4 |
| Eligibility criteria | 6 | Specify study characteristics (e.g., PICOS, length of follow-up) and report characteristics (e.g., years considered, language, publication status) used as criteria for eligibility, giving rationale. *Clearly describe eligible treatments included in the treatment network, and note whether any have been clustered or merged into the same node (with justification).* | ***4-5*** |
| Information sources | 7 | Describe all information sources (e.g., databases with dates of coverage, contact with study authors to identify additional studies) in the search and date last searched. | 5 |
| Search | 8 | Present full electronic search strategy for at least one database, including any limits used, such that it could be repeated. | S3 |
| Study selection | 9 | State the process for selecting studies (i.e., screening, eligibility, included in systematic review, and, if applicable, included in the meta-analysis). | 5 |
| Data collection process | 10 | Describe method of data extraction from reports (e.g., piloted forms, independently, in duplicate) and any processes for obtaining and confirming data from investigators. | 5 |
| Data items | 11 | List and define all variables for which data were sought (e.g., PICOS, funding sources) and any assumptions and simplifications made. | 5 |
| **Geometry of the network** | **S1** | Describe methods used to explore the geometry of the treatment network under study and potential biases related to it. This should include how the evidence base has been graphically summarized for presentation, and what characteristics were compiled and used to describe the evidence base to readers. | ***6-7*** |
| Risk of bias within individual studies | 12 | Describe methods used for assessing risk of bias of individual studies (including specification of whether this was done at the study or outcome level), and how this information is to be used in any data synthesis. | 5-6 |
| Summary measures | 13 | State the principal summary measures (e.g., risk ratio, difference in means). *Also describe the use of additional summary measures assessed, such as treatment rankings and surface under the cumulative ranking curve (SUCRA) values, as well as modified approaches used to present summary findings from meta-analyses.* | 6 |
| Planned methods of analysis | 14 | Describe the methods of handling data and combining results of studies for each network meta-analysis. This should include, but not be limited to:   - *Handling of multi-arm trials;* - *Selection of variance structure;* - *Selection of prior distributions in Bayesian analyses; and* - *Assessment of model fit.* | 6-7 |
| **Assessment of Inconsistency** | **S2** | Describe the statistical methods used to evaluate the agreement of direct and indirect evidence in the treatment network(s) studied. Describe efforts taken to address its presence when found. | 7 |
| Risk of bias across studies | 15 | Specify any assessment of risk of bias that may affect the cumulative evidence (e.g., publication bias, selective reporting within studies). | **5-6** |
| Additional analyses | 16 | Describe methods of additional analyses if done, indicating which were pre-specified. This may include, but not be limited to, the following:   - Sensitivity or subgroup analyses; - Meta-regression analyses; - *Alternative formulations of the treatment network; and* - *Use of alternative prior distributions for Bayesian analyses (if applicable).* | ***7*** |
|  |  |  |  |
| **RESULTS†** |  |  |  |
| Study selection | 17 | Give numbers of studies screened, assessed for eligibility, and included in the review, with reasons for exclusions at each stage, ideally with a flow diagram. | 7 |
| **Presentation of network structure** | **S3** | Provide a network graph of the included studies to enable visualization of the geometry of the treatment network. | ***7-8*** |
| **Summary of network geometry** | **S4** | Provide a brief overview of characteristics of the treatment network. This may include commentary on the abundance of trials and randomized patients for the different interventions and pairwise comparisons in the network, gaps of evidence in the treatment network, and potential biases reflected by the network structure. | ***7-8*** |
| Study characteristics | 18 | For each study, present characteristics for which data were extracted (e.g., study size, PICOS, follow-up period) and provide the citations. | 7-8 |
| Risk of bias within studies | 19 | Present data on risk of bias of each study and, if available, any outcome level assessment. | 8 |
| Results of individual studies | 20 | For all outcomes considered (benefits or harms), present, for each study: 1) simple summary data for each intervention group, and 2) effect estimates and confidence intervals. *Modified approaches may be needed to deal with information from larger networks.* | 8 |
| Synthesis of results | 21 | Present results of each meta-analysis done, including confidence/credible intervals. *In larger networks, authors may focus on comparisons versus a particular comparator (e.g. placebo or standard care), with full findings presented in an appendix. League tables and forest plots may be considered to summarize pairwise comparisons.* If additional summary measures were explored (such as treatment rankings), these should also be presented. | ***8-9*** |
| **Exploration for inconsistency** | **S5** | Describe results from investigations of inconsistency. This may include such information as measures of model fit to compare consistency and inconsistency models, *P* values from statistical tests, or summary of inconsistency estimates from different parts of the treatment network. | ***10, S11*** |
| Risk of bias across studies | 22 | Present results of any assessment of risk of bias across studies for the evidence base being studied. | 8 |
| Results of additional analyses | 23 | Give results of additional analyses, if done (e.g., sensitivity or subgroup analyses, meta-regression analyses*, alternative network geometries studied, alternative choice of prior distributions for Bayesian analyses,* and so forth). | ***9-10*** |
|  |  |  |  |
| **DISCUSSION** |  |  |  |
| Summary of evidence | 24 | Summarize the main findings, including the strength of evidence for each main outcome; consider their relevance to key groups (e.g., healthcare providers, users, and policy-makers). | 10 |
| Limitations | 25 | Discuss limitations at study and outcome level (e.g., risk of bias), and at review level (e.g., incomplete retrieval of identified research, reporting bias). *Comment on the validity of the assumptions, such as transitivity and consistency. Comment on any concerns regarding network geometry (e.g., avoidance of certain comparisons).* | 11-12 |
| Conclusions | 26 | Provide a general interpretation of the results in the context of other evidence, and implications for future research. | 12 |
|  |  |  |  |
| **FUNDING** |  |  |  |
| Funding | 27 | Describe sources of funding for the systematic review and other support (e.g., supply of data); role of funders for the systematic review. This should also include information regarding whether funding has been received from manufacturers of treatments in the network and/or whether some of the authors are content experts with professional conflicts of interest that could affect use of treatments in the network. | ***14*** |

PICOS = population, intervention, comparators, outcomes, study design.

* Text in italics indicateS wording specific to reporting of network meta-analyses that has been added to guidance from the PRISMA statement.

† Authors may wish to plan for use of appendices to present all relevant information in full detail for items in this section.

**S2. Diagnostic criteria of Alcohol use disorder**

**S2 Table** Definition of ICD-10 and DSM-V for Alcohol use disorder

| **Criteria** | **Definition** |
| --- | --- |
| ICD-10 (2016) | F10 Mental and behavioral disorders due to use of alcohol, excluding acute intoxication (F10.0) and use causing damage to physical health. |
| DSM-V | AUD:  A. A problematic pattern of alcohol use leading to clinically significant impairment or distress, as manifested by at least two of the following, occurring within a 12-month period:  1. Alcohol is often taken in larger amounts or over a longer period than was intended.  2. There is a persistent desire or unsuccessful efforts to cut down or control alcohol use.  3. A great deal of time is spent in activities necessary to obtain alcohol, use alcohol, or recover from its effects.  4. Craving, or a strong desire or urge to use alcohol.  5. Recurrent alcohol use resulting in a failure to fulfill major role obligations at work, school, or home.  6. Continued alcohol use despite having persistent or recurrent social or interpersonal problems caused or exacerbated by the effects of alcohol.  7. Important social, occupational, or recreational activities are given up or reduced because of alcohol use.  8. Recurrent alcohol use in situations in which it is physically hazardous.  9. Alcohol use is continued despite knowledge of having a persistent or recurrent physical or psychological problem that is likely to have been caused or exacerbated by alcohol.  10. Tolerance, as defined by either of the follow ing:  a. A need for markedly increased amounts of alcohol to achieve intoxication or de­sired effect.  b . A markedly diminished effect with continued use of the same amount of alcohol.  11. Withdrawal, as manifested by either of the following:  a. The characteristic withdrawal syndrome for alcohol (refer to Criteria A and B of the criteria set for alcohol withdrawal, pp. 499-500).  b . Alcohol (or a closely related substance, such as a benzodiazepine) is taken to relieve or avoid withdrawal symptoms.  Alcohol Withdrawal  A. Cessation of (or reduction in ) alcohol use that has been heavy and prolonged.  B . Two (or more) of the follow ing, developing w ithin several hours to a few days after the cessation of (or reduction in) alcohol use described in Criterion A :  1.Autonomic hyperactivity (e.g., sweating or pulse rate greater than 100 bpm).  2. Increased hand tremor.  3. Insomnia.  4. Nausea or vomiting.  5. Transient visual, tactile, or auditory hallucinations or illusions.  6. Psychomotor agitation.  7. Anxiety.  8. Generalized tonic-clonic seizures.  C. The signs or symptoms in Criterion B cause clinically significant distress or impairment in social, occupational, or other important areas of functioning.  D. The signs or symptoms are not attributable to another medical condition and are not better explained by another mental disorder, including intoxication or withdrawal from another substance. |

**Abbreviations:** ICD, International Classifification of Diseases; DSM, Diagnostic and Statistical Manual of Mental Disorder.

**S3. Treatment modalities**

In order to deal with the overlap of psychotherapy content between groups as much as possible, we classified these psychological approaches with the help of the Nottingham Classification of Psychotherapies system (NCP, the innovative proposal of this classification system brought convenience to systematic reviews of studies on psychological interventions).1 The classification was in S1 Figure.

**S3 Figure** Psychotherapies included in this study referring to Nottingham Classification of Psychotherapies.

**
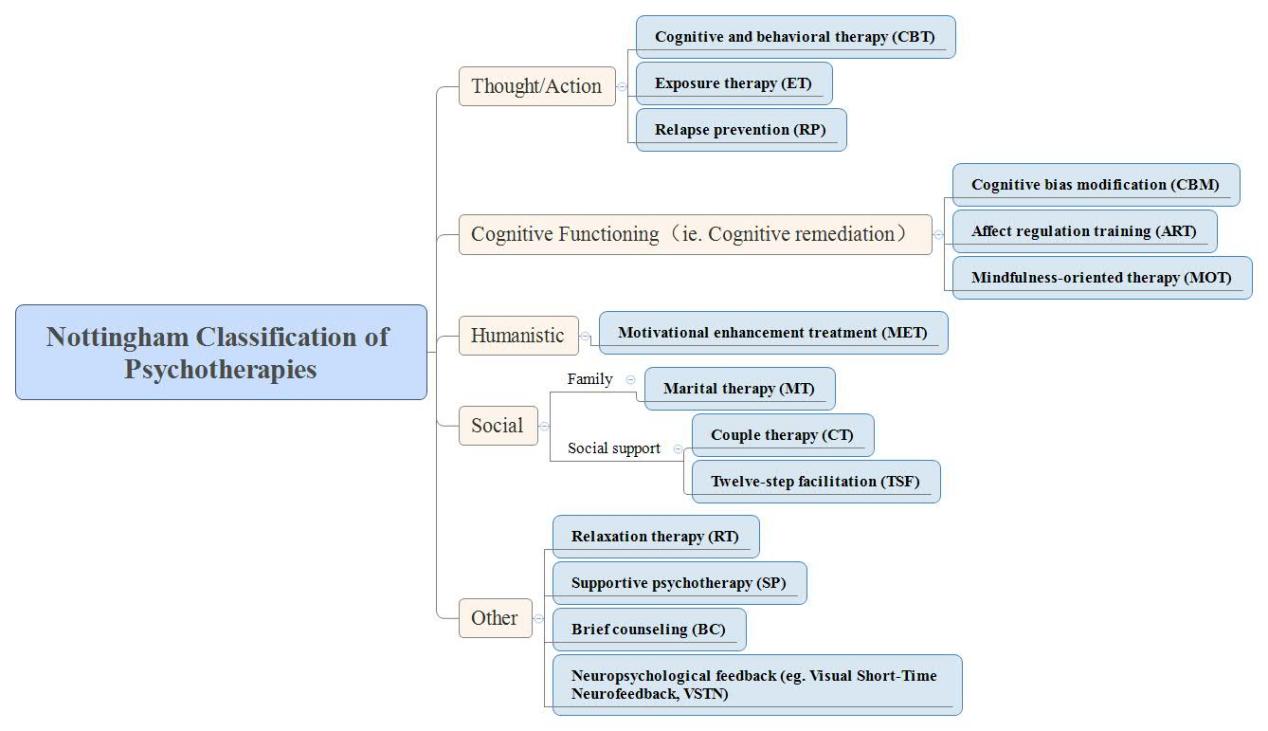
**

**Note:** The NCP classification system was applied for the first level branch (***Thought/Action, Cognitive functioning, Humanistic, Social, and Other***). The contents in **Bold** on the far right (leaf node) are the psychological approaches used in the included studies. This study restricted CBT without cognitive functioning to ***Thought/Action***, in which the two behavioral therapies ET and RP were classified as parallel levels with the approach combining cognitive and behavioral interventions (narrowly defined CBT); for ***Cognitive functioning***, Cognitive bias modification (CBM), Affect regulation training (ART), and Mindfulness-oriented therapy (MOT) were the common approaches for the improvement of cognitive bias, mood, and attention in AUD, respectively; for ***Social support***, the couple and the group therapy modalities were included, the latter such as Twelve-step facilitation (TSF).

All interventions included were clearly defined as follows:

**Treatment as usual (TAU):**

TAU provides subjects with a basic treatment, which helps to ensure that they receive a minimum level of basic support even if the intervention group of the target therapy is unavailable for them, including daily care, monitoring, support related to controlling the condition, treatment plan, nutrition intake, basic relaxation, prevention of human immunodeficiency virus (HIV) and relapse prevention, but has nothing to do with the target therapy.

**Placebo (PLC):**

The placebo included in this study refers to treatments that have received similar treatments without substantial therapeutic components, including drug placebos and sham psychotherapy. Because PLC might also have a certain potential psychological effect, and the target interventions of this study are psychotherapies, it is distinguished from TAU and regarded as a separate sort of control group.

**Cognitive behavioral therapy (CBT):**

CBT is a sort of psychotherapies based on behavioral therapies that integrate social cognitive theories and techniques, modifying the subject's erroneous cognition of important life events or situations, while guiding, shaping, and verifying correct cognition and behavioral responses in life practice.2-4

**Motivational enhancement treatment (MET):**

The main application form of MET is the motivational interviewing (MI), originally developed to advise people with addiction problems (Miller & Rollnick, 1990s).5 MI is a non-directive approach based on a fundamentally ambivalent willingness to change substance-dependent patients. The approach is primarily aimed at people with low or fluctuating withdrawal motivation and is therefore usually used at the beginning of addiction treatment.6 MET uses more positive behaviors to replace bad behaviors. This therapy aims to provide patients with positive affirmation and give them the necessary motivation and desire to guide positive changes and teach self-control.

**Supportive psychotherapy (SP):**

Through guiding, explaining, encouraging, comforting, and venting the psychological crisis that clients face, it supports and assists them to understand and accept the real environment reasonably, so that patients will not sink into the treatment. The main techniques include listening, encouraging, understanding, explaining, guiding, suggesting treatment, etc.7

**Couple therapy (CT):**

It is a sort of therapy that focuses on partner issues (including the intimacy between partners at the macro level and the specific behaviors between partners at the micro level).8 It often integrates behavioral cognitive means and at the same time integrates other types of thinking (such as Dialectical behavior therapy, DBT), by applying the principle of conditioned reflex to partner problems, paying attention to teaching effective communication skills, paying attention to how to find mutual cognitive distortions between them and correcting the problems, and to find out the enhancements needed to improve the communication. At the same time, it also pays attention to emotional factors, so as to improve the satisfaction of both partners and improve the relationship and environment of the partner. The couple therapy in this study is a partner therapy that does not involve marital factors, which is different from the marriage therapy which focuses on marital relationships.

**Marital therapy (MT):**

It is a special kind of CT based on the family support and refers to a treatment method performed by a couple with their husband-and-wife relationship and marital problems as the main focus.9

**Brief counseling (BC):**

It is a short-term psychological consultation to try to complete a stage of counseling tasks in a short time, mainly to solve a key problem, and not to expand the scope indefinitely.

**Twelve-step facilitation (TSF):**

The Twelve-Step Plan is to form a self-help or support group by people with the same addiction or compulsion, such as an anonymous group for abstinence (AA). The meetings usually start with prayer, and members usually discuss what causes their addiction and what motivates them to seek help. The members will support those in difficulties and applaud those who succeed. In addition to encouraging addicts to admit their problems and make compensation, the program also encourages members to regain control of their lives, and provides solutions and emotional support so they can avoid future temptations.10

**Exposure therapy (ET):**

It is a sort of treatment techniques that eliminates negative psychology by conducting the person to imagine or expose themselves to a stimulus or scene that induces psychological or physical discomfort. In the treatment of alcoholism, the target of ET is to deal with the existing conditioning and sensitization processes to disconnect them from relapse.11 It is essentially a behavioral therapy, but has its own distinctive and independent characteristics, so this study included it as a type of independent psychotherapy instead of classifying it as CBT. According to whether or not the object of fear is faced in person, it is divided into vivo exposure/Imaginal exposure/virtual reality exposure/interoceptive exposure; according to different methods, divided into stepwise exposure/flooding/systematic desensitization.

**Affect regulation training (ART):**

It is a therapy to enhance self-control and adjustment ability of emotion by using empathy training, compulsion control and problem-solving, anger management, etc.12

**Relaxation therapy (RT):**

It is a sort of treatment using techniques that releases psychological or physical stress to improve one's health condition but does not emphasize the impact on mindfulness in this study, like progressive relaxation training, self-training method, relaxation training, or assisted by biofeedback, etc (Pubmed Mesh (2009) as reference).

**Mindfulness-oriented therapy (MOT):**

The first western definition of mindfulness was described as “paying attention in a particular way, on purpose, in the present moment, and non-judgmentally” (Kabat-Zinn).13 Afterwards, mindfulness was operationalized as a particular focus of attention categorized by 2 distinct features related largely to the attention self-regulation toward the immediate present moment and an attitude marked by inquisitiveness, openness, and acceptance (Bishop et al.).14 Finally, a third component was added that underlines the intention or the personal motivation in engaging with mindfulness practice (Shapiro et al. ).15 Rather than a sort of cognitive behavioral training, MOT mentioned in this study is mindfulness oriented therapy of a narrow sense, which helps improve attention regulation with mindfulness conduct like zazen, transcendental meditation, qigong, yoga, etc.

**Visual Short-Time Neurofeedback (VSTN):**

Patients in the VSTN group received certain sessions of visual Neurofeedback training over a period to enhance α/θ frequency band power.16-17

**Health education (HE):**

Patients receive publicity and education on general knowledge of physical and mental health, but they are not directly related to improving AUDs, usually in the form of distributing handbooks.

**Relapse prevention (RP):**

Its purpose is to help patients identify high-risk scenarios of recurrence, maintain vigilance against recurrence, strengthen self-control and learn the skills to deal with various high-risk scenarios of recurrence, so as to avoid the recurrence of alcohol dependence.18

**Cognitive bias modification (CBM):**

The cognitive bias modification training scheme, which is an adapted version of the approach-avoidance task and aims to retrain approach biases, has been shown to reduce alcohol craving and relapse rates.19

**S4. Literature search strategy**

The following search terms were used for the MEDLINE(Pubmed), [APA PsycArticles](https://web-b-ebscohost-com.ezproxy.montclair.edu/ehost/search/javascript:__doPostBack('ctl00$ctl00$MainContentArea$MainContentArea$SelectDbControl$dbList$ctl05$ctl00$titleLink','')) & PsycInfo via EBSCO Databases, Embase and Cochrane Library, limiting searches to studies in humans and English-language publications (from inception to 2022.4.10).

**PubMed**

**#1** **Alcoholism[mh]** OR **Alcohol Withdrawal Seizures[mh]** OR Alcohol Dependence[tiab] OR Dependence, Alcohol[tiab] OR Alcohol Addiction[tiab] OR Addiction, Alcohol[tiab] OR Alcoholic Intoxication, Chronic[tiab] OR Chronic Alcoholic Intoxication[tiab] OR Intoxication, Chronic Alcoholic[tiab] OR Alcohol Use Disorder*[tiab] OR Alcohol Abuse[tiab] OR Abuse, Alcohol[tiab] OR Alcohol Withdrawal Seizure*[tiab] OR Seizure*, Alcohol Withdrawal[tiab] OR Alcohol-Related Seizure*[tiab] OR Alcohol Related Seizure*[tiab] OR Seizure*, Alcohol-Related[tiab] OR Alcohol Withdrawal-Induced Seizure*[tiab] OR Alcohol Withdrawal Induced Seizure*[tiab] OR Seizure*, Alcoholic[tiab] OR Alcoholic Seizure*[tiab] OR alcohol withdrawal syndrome[tiab] OR ethanol withdrawal syndrome[tiab] OR alcohol dependence[tiab] OR ethanol dependence[tiab] OR alcohol addiction[tiab] OR ethanol addiction[tiab] OR alcohol abuse[tiab] OR ethanol abuse[tiab]

**#2** **Psychotherapy[mh]** or Psychotherap*[tiab] or Animal Assisted[tiab] or Animal Facilitated[tiab] or Facilitated Therap*[tiab] or Pet Therap*[tiab] or Therap*, Pet[tiab] or Pet Facilitated[tiab] or Pet-Assisted[tiab] or Pet Assisted[tiab] or Equine Assisted[tiab] or Equine-Assisted[tiab] or Hippotherap*[tiab] or Riding Therap*[tiab] or Horseback Riding[tiab] or Aromatherap*[tiab] or Aroma[tiab] or Therap*, Art[tiab] or Art Therap*[tiab] or Behavior Therap*[tiab] or Therap*, Behavior[tiab] or Therap*, Conditioning[tiab] or Conditioning Therap*[tiab] or Behavior Treatment[tiab] or Treatment, Behavior[tiab] or Behavior Modification*[tiab] or Modification*, Behavior[tiab] or Anger Management[tiab] or Management, Anger[tiab] or Management Training, Anger[tiab] or Analys*, Applied Behavior[tiab] or Applied Behavior Analys*[tiab] or Behavior Analys*, Applied[tiab] or Therap*, Aversi*[tiab] or Aversi* Therap*[tiab] or Feedback*, Psychologic*[tiab] or Psychologic* Feedback*[tiab] or Biofeedback*[tiab] or Myofeedback*[tiab] or Feedback*, False Physiological[tiab] or Physiological Feedback*[tiab] or Feedback*, Bogus Physiological[tiab] or Behavior* Therap*, Cognitive[tiab] or Cognitive Behavior*[tiab] or Cogniti* Psychotherap*[tiab] or Cogniti* Therap*[tiab] or Psychotherap*, Cogniti*[tiab] or Therap*, Cogniti*[tiab] or Remediation, Cogniti*[tiab] or Desensitization*[tiab] or EMDR[tiab] or Implosive Therap*[tiab] or Therap*, Implosive[tiab] or Flooding*, Imaginal[tiab] or Imaginal Flooding*[tiab] or Flooding Therap*[tiab] or Therap*, Flooding[tiab] or Exposure Therap*[tiab] or Therap*, Exposure[tiab] or Virtual Reality Therap*[tiab] or Virtual Reality Immersion Therapy[tiab] or Reality Therap*[tiab] or Therap*, Reality[tiab] or Therap*, Virtual Reality[tiab] or Behavior Therap*, Dialectical[tiab] or Dialectical Behavior Therap*[tiab] or Relaxation[tiab] or Nature Therap*[tiab] or Therap*, Nature[tiab] or Ecotherap*[tiab] or Transcendental Meditation[tiab] or Meditation, Transcendental[tiab] or Chronotherap*, Sleep Phase[tiab] or Sleep Phase Chronotherap*[tiab] or Phase Advance Chronotherap*[tiab] or Advance Chronotherap*, Phase[tiab] or Chronotherap*, Phase Advance[tiab] or Phase Delay Chronotherap*[tiab] or Chronotherap*, Phase Delay[tiab] or Delay Chronotherap*, Phase[tiab] or Bibliotherap*[tiab] or Therap*, Color[tiab] or Chromatotherapy[tiab] or Chromotherapy[tiab] or Crisis Intervention*[tiab] or Intervention*, Crisis[tiab] or Brief Advice[tiab] or Advice, Brief[tiab] or Brief Treatment*[tiab] or Treatment*, Brief[tiab] or Brief Intervention*[tiab] or Intervention*, Brief[tiab] or Critical Incident Stress Debriefing[tiab] or Dance[tiab] or Emotion* Focused Therap*[tiab] or Emotion-Focused Therap*[tiab] or Therap*, Emotion-Focused[tiab] or Therap*, Emotion* Focused[tiab]

**#3** Feedback*, Sensor*[tiab] or Sensor* Feedback*[tiab] or Visual Feedback*[tiab] or Feedback*, Visual[tiab] or Audio Feedback*[tiab] or Feedback*, Audio[tiab] or Proprioceptive Feedback*[tiab] or Feedback*, Proprioceptive[tiab] or Neurofeedback*[tiab] or Brainwave Feedback*[tiab] or Feedback*, Brainwave[tiab] or Alpha Feedback*[tiab] or Feedback*, Alpha[tiab] or Electro* Feedback*[tiab] or Feedback*, Electro*[tiab] or EEG Feedback*[tiab] or Feedback*, EEG[tiab] or Therap*, Gestalt[tiab] or Therap*, Horticultural[tiab] or Garden* Therap*[tiab] or Therap*, Garden*[tiab] or Horticulture, Therap*[tiab] or Hypnotism[tiab] or Hypnoanalysis[tiab] or Hypnotherap*[tiab] or Mesmerism[tiab] or Training, Autogenic[tiab] or Progressive Muscle Relaxation[tiab] or Muscle Relaxation, Progressive[tiab] or Relaxation, Progressive Muscle[tiab] or Progressive Relaxation[tiab] or Relaxation, Progressive[tiab] or Suggestion*[tiab] or Autosuggestion*[tiab] or Imagery, Psychotherap*[tiab] or Imagery[tiab] or Psychotherap* Imagery[tiab] or Guided Imagery[tiab] or Imagery, Guided[tiab] or Imagery Psychotherap*[tiab] or Directed Reverie Therap*[tiab] or Reverie Therap*, Directed[tiab] or Therap*, Directed Reverie[tiab] or Psychotherap*, Interpersonal[tiab] or Logotherap*[tiab] or Therap*, Music[tiab] or Play Therap*[tiab] or Narrative Therap*[tiab] or Therap*, Narrative[tiab] or Person Centered Psychotherap*[tiab] or Person-Centered Psychotherap*[tiab] or Psychotherap*, Person-Centered[tiab] or Client-Centered Therap*[tiab] or Client Centered Therap*[tiab] or Rogerian Therap*[tiab] or Nondirective Therap*[tiab] or Therap*, Rogerian[tiab] or Therap*, Client-Centered[tiab] or Client-Centered Therap*[tiab] or Therap*, Client Centered[tiab] or Therap*, Nondirective[tiab] or Nondirective Therap*[tiab] or Therap*, Play[tiab] or Sandplay Therap*[tiab] or Therap*, Sandplay[tiab] or Sandplay*[tiab] or Psychoanalytic* Therap*[tiab] or Therap*, Psychoanalytic*[tiab] or Balint Psychoanalytic Therap*[tiab] or Psychoanalytic Therap*, Balint[tiab] or Therap*, Balint Psychoanalytic[tiab] or Association*, Free[tiab] or Free Association*[tiab] or Analys*, Transactional[tiab] or Transactional Analys*[tiab] or Intervention*, Psychosocial[tiab] or Psychosocial Intervention*[tiab] or Intervention*, Psychologic*[tiab] or Psychologic* Intervention*[tiab] or psychologic* treatment*[tiab] or psychologic* therap*[tiab] or Process*, Psychotherapeutic[tiab] or Psychotherapeutic Process[tiab] or Process*, Psychiatric Therapeutic[tiab] or Therapeutic Processes, Psychiatric[tiab] or Psychiatric Therapeutic Process*[tiab] or Therapeutic Process*, Psychiatric[tiab] or Abreaction*[tiab] or Cathars*[tiab] or Association*[tiab] or Alliance*, Therapeutic[tiab] or Therapeutic Alliance*[tiab] or Psycholog* Transference*[tiab] or Transference*, Psycholog*[tiab] or Countertransference, Psychology[tiab] or Psychotherap*, Brief[tiab] or Brief Psychotherap*[tiab] or Psychotherap*, Short-Term[tiab] or Psychotherap*, Short Term[tiab] or Short-Term Psychotherap*[tiab] or Short Term Psychotherap*[tiab] or Solution-Focused Brief Therap*[tiab] or Brief Therap*, Solution-Focused[tiab] or Solution Focused Brief Therap*[tiab] or Therap*, Solution-Focused Brief[tiab] or Multiple Psychotherap*[tiab] or Psychotherap*, Multiple[tiab] or Psychodynamic Psychotherap*[tiab] or Psychotherap*, Psychodynamic[tiab] or Psychotherap*, Rational-Emotive[tiab] or Psychotherap*, Rational Emotive[tiab] or Rational-Emotive Psychotherap*[tiab] or Rational Psychotherapy[tiab] or Rational Emotive Psychotherapy[tiab] or Psychotherap*, Rational[tiab] or Rational Psychotherap*[tiab] or Schema Therap*[tiab] or Therap*, Schema[tiab] or Therap*, Socioenvironmental[tiab] or Socioenvironmental Therap*[tiab] or Situational Therap*[tiab] or Therap*, Situational[tiab] or Therap*, Milieu[tiab] or Milieu Therap*[tiab] or Communit*, Therapeutic[tiab] or Therapeutic Communit*[tiab] or Group Psychotherap*[tiab] or Therap*, Group[tiab] or Group Therap*[tiab] or Couple* Therap*[tiab] or Therap*, Couple*[tiab] or Marital Therap*[tiab] or Therap*, Marital[tiab] or Therap*, Marriage[tiab] or Marriage Therap*[tiab] or Therap*, Family[tiab] or Family Therap*[tiab] or Drama Therap*[tiab] or Therap*, Drama[tiab] or Dramatherap*[tiab] or Playing*, Role[tiab] or Role Playing*[tiab] or Group*, Sensitivity Training[tiab] or Sensitivity Training Group*[tiab] or Training Group*, Sensitivity[tiab] or T-Group*[tiab] or T Group*[tiab] or Encounter Group*[tiab] or Group*, Encounter[tiab] or Residential Treatment*[tiab] or Treatment*, Residential[tiab]

**#4 Sensory Art Therapies[mh]** or Therap*, Sensory Art[tiab] or Stimulation, Acoustic[tiab] or Auditory Stimulation[tiab] or Stimulation, Auditory[tiab]

**#5 Psychology, Clinical[mh]** or Clinical Psychology[tiab]

**#6** **Psychological Techniques[mh]** or Mindfulness-based intervention*[tiab] or Psychologic* Techni*[tiab] or Techni*, Psychologic*[tiab]

**#7** Randomized controlled trial[pt] or controlled clinical trial[pt] or randomized[tiab] or placebo[tiab] or Randomized Controlled Trials as Topic[mh:noexp] or randomly[tiab] or trial[ti]

**#8** animals[mh] NOT humans[mh]

**#9** #7 NOT #8

**# 10** #2 OR #3 OR #4 OR #5 OR #6

#11 #1 AND #10 AND #9 (3,668 results)

[**APA PsycArticles**](https://web-b-ebscohost-com.ezproxy.montclair.edu/ehost/search/javascript:__doPostBack('ctl00$ctl00$MainContentArea$MainContentArea$SelectDbControl$dbList$ctl05$ctl00$titleLink','')) **& PsycInfo via EBSCO Databases**

[(DE "Alcohol Use Disorder" OR DE "Alcohol Withdrawal" OR DE "Alcoholism") AND (DE "Psychotherapy") AND (DE "Randomized Clinical Trials" OR DE "Randomized Controlled Trials")](http://search.ebscohost.com.elib.tcd.ie/login.aspx?direct=true&db=pdh&db=psyh&bquery=(DE+&quot;Alcohol+Use+Disorder&quot;+OR+DE+&quot;Alcohol+Withdrawal&quot;+OR+DE+&quot;Alcoholism&quot;)++AND++(DE+&quot;Psychotherapy&quot;)+AND+(DE+&quot;Randomized+Clinical+Trials&quot;+OR+DE+&quot;Randomized+Controlled+Trials&quot;)&type=1&searchMode=Relevancy&site=ehost-live)

Expanders - Apply equivalent subjects

Narrow by Methodology: - clinical trial

Narrow by Methodology: - prospective study

Narrow by Methodology: - followup study

Narrow by Population: - transgender

Narrow by Population: - inpatient

Narrow by Population: - outpatient

Narrow by Population: - female

Narrow by Population: - male

Narrow by Language: - english

Search modes - SmartText Searching (1,687 results)

**Cochrane Library**

**#1** MeSH descriptor: [Alcoholism] explode all trees

**#2** MeSH descriptor: [Alcohol Withdrawal Seizures] explode all trees

**#3** ("Alcohol Dependence" OR "Dependence, Alcohol" OR "Alcohol Addiction" OR "Addiction, Alcohol" OR "Alcoholic Intoxication, Chronic" OR "Chronic Alcoholic Intoxication" OR "Intoxication, Chronic Alcoholic" OR "Alcohol Use Disorder" OR "Alcohol Use Disorders" OR "Use Disorder, Alcohol" OR "Use Disorders, Alcohol" OR "Alcohol Abuse" OR "Abuse, Alcohol" OR "Alcohol Withdrawal Seizure" OR "Seizure, Alcohol Withdrawal" OR "Seizures, Alcohol Withdrawal" OR "Alcohol-Related Seizures" OR "Alcohol Related Seizures" OR "Alcohol-Related Seizure" OR "Seizures, Alcohol-Related" OR "Alcohol Withdrawal-Induced Seizure" OR "Alcohol Withdrawal Induced Seizure" OR "Alcohol Withdrawal-Induced Seizures" OR "Seizures, Alcoholic" OR "Alcoholic Seizures" OR "alcohol withdrawal syndrome" OR "ethanol withdrawal syndrome" OR "ethanol dependence" OR "ethanol addiction" OR "alcohol abuse" OR "ethanol abuse"):ti,ab,kw

**#4** #1 OR #2 OR #3

**#5** MeSH descriptor: [**Psychotherapy**] explode all trees

**#6** (Psychotherap* OR Directed Reverie Therap* OR Therap*, Directed Reverie OR Reverie Therap*, Directed OR "Imagery" OR Therap*, Narrative OR Narrative Therap* OR ((Client-Centered OR Client Centered) Therap*) OR (Therap*, (Client-Centered OR Client Centered)) OR (Therap*, (Rogerian OR Nondirective)) OR ((Rogerian OR Nondirective) Therap*) OR ((Animal OR Pet) (Facilitated OR Assisted) Therap*) OR ((Facilitated OR Assisted) Therap*, Animal) OR (Therap*, (Animal OR Pet) (Assisted OR Facilitated)) OR Pet-Assisted Therap* OR Therap*, Pet-Assisted OR Pet Therap* OR Therap*, Pet OR Recreational Horseback Riding Therap* OR Riding Therap* OR Therap*, Horseback Riding OR Therap*, Equine-Assisted OR Equine-Assisted Therap* OR Equine Assisted Therap* OR Hippotherap* OR "ECT" OR Aroma Therap* OR Therap*, Aroma OR Aromatherap* OR Therap*, Art OR Art Therap* OR ((Treatment? OR Therap* OR Modification?), Behavio?r) OR (Behavio?r (Treatment? OR Therap* OR Modification?)) OR Conditioning Therap* OR Therap*, Conditioning OR "Anger Management" OR "Management Training, Anger" OR "Management, Anger" OR Behavio?r Analys*, Applied OR Analys*, Applied Behavio?r OR Applied Behavio?r Analys* OR Therap*, Aversi* OR Aversi* Therap* OR ((Bogus OR False) Physiologic* Feedback*) OR (Physiologic* Feedback*, (Bogus OR False)) OR (Feedback*, (Bogus OR False) Physiologic*) OR Psychology Biofeedback* OR Biofeedback*, Psychology OR Myofeedback* OR (Feedback*, (Psycho* OR Brainwave OR Alpha OR EEG OR Electromyography OR Audio OR Visual OR Sensory OR Proprioceptive OR Sensorimotor)) OR ((Alpha OR Brainwave OR EEG OR Electroencephalography OR Psychophysiologic*) Biofeedback*) OR ((EEG OR Alpha OR Electromyography OR Brainwave OR Psycho* OR Audio OR Visual OR Sensory OR Proprioceptive OR Sensorimotor) Feedback*) OR (Biofeedback*, (EEG OR Electroencephalography OR Alpha OR Brainwave)) OR "Neurofeedbacks" OR Therap*, Cognitive Behavio* OR Cognitive Behavio* Therap* OR Behavio* Therap*, Cognitive OR Therap*, Cogniti* OR Cogniti* Therap* OR Psychologic* Desensitization* OR Desensitization*, Psychologic* OR "Eye Movement Desensitization and Processing" OR "EMDR" OR Implosive Therap* OR Virtual Reality Immersion Therap* OR Virtual Reality Therap* OR Therap*, Virtual Reality OR Reality Therap*, Virtual OR Nature Therap* OR Therap*, Nature OR (Relaxation (Techni* OR Therap*)) OR ((Techni* OR Therap*), Relaxation) OR Ecotherap* OR "Transcendental Meditation" OR "Meditation, Transcendental" OR (Chronotherap*, (Phase Advance OR Sleep Phase OR Phase Delay)) OR ((Advance OR Delay) Chronotherap*, Phase) OR ((Phase Advance OR Sleep Phase OR Phase Delay) Chronotherap*) OR Bibliotherap* OR Therap*, Color OR Chromatotherap* OR Chromotherap* OR Screening and Brief Intervention? OR Critical Incident Stress Debriefing OR (Intervention*, (Brief OR Crisis)) OR ((Brief OR Crisis) Intervention*) OR (Brief (Advice OR Treatment?)) OR ((Advice OR Treatment?), Brief) OR Therap*, Dance OR Dance Therap* OR (Therap*, (Garden* OR Horticultur*)) OR ((Garden* OR Horticultur*) Therap*) OR Horticulture, Therap* OR "Mesmerism" OR Hypnotherap* OR Hypnoanalys* OR "Hypnotism" OR ((Muscle OR Progressive) Relaxation*) OR (Relaxation*, (Muscle OR Progressive)) OR "Training, Autogenic" OR Suggestion? OR Autosuggestion? OR Logotherap* OR Therap*, Music OR Neurologic* Rehabilitation* OR Rehabilitation*, Neurologic* OR "Neurorehabilitation" OR Play Therap* OR Therap*, Play OR Sandplay* OR Psychoanalytic* Therap* OR Association? OR Analys*, Transactional OR Transactional Analys* OR (Intervention?, (Psychosocial OR Psychologic*)) OR ((Psychosocial OR Psychologic*) Intervention?) OR Process*, Psychiatric Therapeutic OR Psychiatric Therapeutic Process* OR Therapeutic Process*, Psychiatric OR Psychotherapeutic OR Abreaction* OR Cathars* OR Alliance?, Therapeutic OR Therapeutic Alliance? OR Transference? OR Countertransference, Psychology OR Brief Therap*, Solution-Focused OR Therap*, Solution-Focused Brief OR Solution-Focused Brief Therap* OR Solution Focused Brief Therap* OR Short-Term Psychotherap* OR Psychotherap*, Short Term OR Psychotherap*, Short-Term OR Short Term Psychotherap* OR (Therap*, (Reality OR Schema OR Socioenvironmental OR Situational OR Milieu)) OR ((Reality OR Schema OR Socioenvironmental OR Situational OR Milieu) Therap*) OR Therapeutic Communit* OR Communit*, Therapeutic OR ((Group? OR Couple?) Therap*) OR (Therap*, (Group? OR Couple?)) OR ((Marriage OR Marital OR Family) Therap*) OR (Therap*, (Marriage OR Marital OR Family)) OR Therap*, Drama OR Drama Therap* OR Dramatherap* OR Role Playing? OR Playing?, Role OR Group?, Sensitivity Training OR Training Group?, Sensitivity OR Sensitivity Training Group? OR Encounter Group? OR Group?, Encounter OR T-Group? OR T Group? OR Residential Treatment? OR Treatment?, Residential):ti,ab,kw

**#7** MeSH descriptor: [[**Psychological Techniques**](https://www.cochranelibrary.com/advanced-search/mesh#0)] explode all trees

**#8** ((Psychologic* Techni*) OR (Techni*, Psychologic*)):ti,ab,kw

**#9** MeSH descriptor: [[**Psychology, Clinical**](https://www.cochranelibrary.com/advanced-search/mesh#0)] explode all trees

**#10** (Clinical Psychology):ti,ab,kw

**#11** MeSH descriptor: [[**Sensory Art Therapies**](https://www.cochranelibrary.com/advanced-search/mesh#0)] explode all trees

**#12** (Therap*, Sensory Art OR Art Therap*, Sensory OR Stimulation?, Auditory OR Stimulation?, Acoustic OR Auditory Stimulation?):ti,ab,kw

**#13** #5 OR #6 OR #7 OR #8 OR #9 OR #10 OR #11 OR #12

**#14** MeSH descriptor: [Clinical Study] explode all trees

**#15** MeSH descriptor: [Comparative Study] explode all trees

**#16** MeSH descriptor: [Clinical Studies as Topic] explode all trees

**#17** MeSH descriptor: [Randomized Controlled Trials as Topic] explode all trees

**#18** MeSH descriptor: [Equivalence Trials as Topic] explode all trees

**#19** MeSH descriptor: [Random Allocation] explode all trees

**#20** MeSH descriptor: [[Double-Blind Method](https://www-cochranelibrary-com.jerome.stjohns.edu/advanced-search/mesh?term=Phototherapy&qualifier=#0)] explode all trees

**#21** MeSH descriptor: [[Single-Blind Method](https://www-cochranelibrary-com.jerome.stjohns.edu/advanced-search/mesh?term=Phototherapy&qualifier=#0)] explode all trees

**#22** ("randomized controlled trial" OR "Clinical Study" OR "Clinical trial" OR "controlled clinical trial" OR "comparative study" OR "Equivalence Trial" OR "Pragmatic clinical trial" OR "Clinical Trials, Randomized" OR "Trials, Randomized Clinical" OR "Controlled Clinical Trials, Randomized" OR "Clinical Trial as Topic" OR "Comparative Studies" OR "Naturalistic Randomized Clinical Trial" OR "Practical Clinical Trials" OR "Clinical Trials, Practical" OR "Pragmatic Trials" OR "Trials, Pragmatic" OR "Pragmatic Clinical Trials" OR "Clinical Trials, Pragmatic" OR "Trials, Pragmatic Clinical" OR "Clinical study" OR "Clinical trial" OR "Pragmatic clinical trial" OR "Allocation, Random" OR "Randomization" OR "Randomized" OR "Placebo" OR "randomly" OR "trial" OR "Case-control" OR "Case-Control Study" OR "Studies, Case-Control" OR "Study, Case-Control" OR "Case-Comparison Studies" OR "Case-Comparison Study" OR "Case-Compeer Studies" OR "Case-Base Studies" OR "Case Base Studies" OR "Studies, Case-Base" OR "Case Control Studies" OR "Case Control Study" OR "Studies, Case Control" OR "Study, Case Control" OR "comparative study" OR "risk factors" OR "case control"):ti,ab,kw

**#23** #14 OR #15 OR #16 OR #17 OR #18 OR #19 OR #20 OR #21 OR #22

**#24** MeSH descriptor: [Animal Experimentation] explode all trees

**#25** animal:ti,ab,kw

**#26** #24 OR #25

**#27** #23 NOT #26

**#28** #4 and #13 and #27 (with Cochrane Library publication date to April 2022) (8,977 results: 200 reviews, 8758 trials, 1 editorial)

**Embase**

**#1** 'Alcoholism'/exp OR 'Alcohol Withdrawal Seizure'/exp OR 'Alcohol Dependence':ab,ti OR 'Dependence, Alcohol':ab,ti OR 'Alcohol Addiction':ab,ti OR 'Addiction, Alcohol':ab,ti OR 'Alcoholic Intoxication, Chronic':ab,ti OR 'Chronic Alcoholic Intoxication':ab,ti OR 'Intoxication, Chronic Alcoholic':ab,ti OR 'Alcohol Use Disorder$':ab,ti OR 'Use Disorder$, Alcohol':ab,ti OR 'Alcohol Abuse':ab,ti OR 'Abuse, Alcohol':ab,ti OR 'Alcohol Withdrawal Seizure$':ab,ti OR 'Seizure$,Alcohol Withdrawal':ab,ti OR 'Alcohol Related Seizure$':ab,ti OR 'Seizure$, Alcohol Related':ab,ti OR 'Alcohol Withdrawal Induced Seizure$':ab,ti OR 'Seizure$, Alcoholic':ab,ti OR 'Alcoholic Seizure$':ab,ti OR 'alcohol withdrawal syndrome':ab,ti OR 'ethanol withdrawal syndrome':ab,ti OR 'alcohol dependence':ab,ti OR 'ethanol dependence':ab,ti OR 'alcohol addiction':ab,ti OR 'ethanol addiction':ab,ti OR 'alcohol abuse':ab,ti OR 'ethanol abuse':ab,ti

**#2** '**Psychotherapy**'/exp OR '**psychiatric treatment**'/exp

**#3** 'Psychotherap*':ti,ab OR 'Directed Reverie Therap*':ti,ab OR 'Therap*, Directed Reverie':ti,ab OR 'Reverie Therap*, Directed':ti,ab OR 'Imagery':ti,ab OR 'Therap*, Narrative':ti,ab OR 'Narrative Therap*':ti,ab OR 'Client Centered Therap*':ti,ab OR 'Therap*, Client Centered':ti,ab OR (Therap*, (Rogerian OR Nondirective)):ti,ab OR ((Rogerian OR Nondirective) Therap*):ti,ab OR ((Animal OR Pet) (Facilitated OR Assisted) Therap*):ti,ab OR ((Facilitated OR Assisted) Therap*, Animal):ti,ab OR (Therap*, (Animal OR Pet) (Assisted OR Facilitated)):ti,ab OR 'Pet Assisted Therap*':ti,ab OR 'Therap*, Pet Assisted':ti,ab OR 'Pet Therap*':ti,ab OR 'Therap*, Pet':ti,ab OR 'Recreational Horseback Riding Therap*':ti,ab OR 'Riding Therap*':ti,ab OR 'Therap*, Horseback Riding':ti,ab OR 'Therap*, Equine Assisted':ti,ab OR 'Equine Assisted Therap*':ti,ab OR 'Hippotherap*':ti,ab OR 'ECT':ti,ab OR 'Aroma Therap*':ti,ab OR 'Therap*, Aroma':ti,ab OR 'Aromatherap*':ti,ab OR 'Therap*, Art':ti,ab OR 'Art Therap*':ti,ab OR ((Treatment$, OR Therap*, OR Modification$,) Behavio$r):ti,ab OR (Behavio$r (Treatment$ OR Therap* OR Modification$)):ti,ab OR 'Conditioning Therap*':ti,ab OR 'Therap*, Conditioning':ti,ab OR 'Anger Management':ti,ab OR 'Management Training, Anger':ti,ab OR 'Management, Anger':ti,ab OR 'Behavio$r Analys*, Applied':ti,ab OR 'Analys*, Applied Behavio$r':ti,ab OR 'Applied Behavio$r Analys*':ti,ab OR 'Therap*, Aversi*':ti,ab OR 'Aversi* Therap*':ti,ab OR ((Bogus OR False) Physiologic* Feedback*):ti,ab OR (Physiologic* Feedback*, (Bogus OR False)):ti,ab OR (Feedback*, (Bogus OR False) Physiologic*):ti,ab OR 'Psychology Biofeedback*':ti,ab OR 'Biofeedback*, Psychology':ti,ab OR 'Myofeedback*':ti,ab OR (Feedback*, (Psycho* OR Brainwave OR Alpha OR EEG OR Electromyography OR Audio OR Visual OR Sensory OR Proprioceptive OR Sensorimotor)):ti,ab OR ((Alpha OR Brainwave OR EEG OR Electroencephalography OR Psychophysiologic*) Biofeedback*):ti,ab OR ((EEG OR Alpha OR Electromyography OR Brainwave OR Psycho* OR Audio OR Visual OR Sensory OR Proprioceptive OR Sensorimotor) Feedback*):ti,ab OR (Biofeedback*, (EEG OR Electroencephalography OR Alpha OR Brainwave)):ti,ab OR 'Neurofeedbacks':ti,ab OR 'Therap*, Cognitive Behavio*':ti,ab OR 'Cognitive Behavio* Therap*':ti,ab OR 'Behavio* Therap*, Cognitive':ti,ab OR 'Therap*, Cogniti*':ti,ab OR 'Cogniti* Therap*':ti,ab OR 'Psychologic* Desensitization*':ti,ab OR 'Desensitization*, Psychologic*':ti,ab OR 'Eye Movement Desensitization and Processing':ti,ab OR 'EMDR':ti,ab OR 'Implosive Therap*':ti,ab OR 'Virtual Reality Immersion Therap*':ti,ab OR 'Virtual Reality Therap*':ti,ab OR 'Therap*, Virtual Reality':ti,ab OR 'Reality Therap*, Virtual':ti,ab OR 'Nature Therap*':ti,ab OR 'Therap*, Nature':ti,ab OR (Relaxation (Techni* OR Therap*)):ti,ab OR ((Techni*, OR Therap*,) Relaxation):ti,ab OR 'Ecotherap*':ti,ab OR 'Transcendental Meditation':ti,ab OR 'Meditation, Transcendental':ti,ab OR (Chronotherap*, (Phase Advance OR Sleep Phase OR Phase Delay)):ti,ab OR ((Advance OR Delay) Chronotherap*, Phase):ti,ab OR ((Phase Advance OR Sleep Phase OR Phase Delay) Chronotherap*):ti,ab OR 'Bibliotherap*':ti,ab OR 'Therap*, Color':ti,ab OR 'Chromatotherap*':ti,ab OR 'Chromotherap*':ti,ab OR 'Screening and Brief Intervention$':ti,ab OR 'Critical Incident Stress Debriefing':ti,ab OR (Intervention*, (Brief OR Crisis)):ti,ab OR ((Brief OR Crisis) Intervention*):ti,ab OR (Brief (Advice OR Treatment$)):ti,ab OR ((Advice, OR Treatment$,) Brief):ti,ab OR 'Therap*, Dance':ti,ab OR 'Dance Therap*':ti,ab OR (Therap*, (Garden* OR Horticultur*)):ti,ab OR ((Garden* OR Horticultur*) Therap*):ti,ab OR 'Horticulture, Therap*':ti,ab OR 'Mesmerism':ti,ab OR 'Hypnotherap*':ti,ab OR 'Hypnoanalys*':ti,ab OR 'Hypnotism':ti,ab OR ((Muscle OR Progressive) Relaxation*):ti,ab OR (Relaxation*, (Muscle OR Progressive)):ti,ab OR 'Training, Autogenic':ti,ab OR 'Suggestion$':ti,ab OR 'Autosuggestion$':ti,ab OR 'Logotherap*':ti,ab OR 'Therap*, Music':ti,ab OR 'Neurologic* Rehabilitation*':ti,ab OR 'Rehabilitation*, Neurologic*':ti,ab OR 'Neurorehabilitation':ti,ab OR 'Play Therap*':ti,ab OR 'Therap*, Play':ti,ab OR 'Sandplay*':ti,ab OR 'Psychoanalytic* Therap*':ti,ab OR 'Association$':ti,ab OR 'Analys*, Transactional':ti,ab OR 'Transactional Analys*':ti,ab OR (Intervention$, (Psychosocial OR Psychologic*)):ti,ab OR ((Psychosocial OR Psychologic*) Intervention$):ti,ab OR 'Process*, Psychiatric Therapeutic':ti,ab OR 'Psychiatric Therapeutic Process*':ti,ab OR 'Therapeutic Process*, Psychiatric':ti,ab OR 'Psychotherapeutic':ti,ab OR 'Abreaction*':ti,ab OR 'Cathars*':ti,ab OR 'Alliance$, Therapeutic':ti,ab OR 'Therapeutic Alliance$':ti,ab OR 'Transference$':ti,ab OR 'Countertransference, Psychology':ti,ab OR 'Brief Therap*, Solution-Focused':ti,ab OR 'Therap*, Solution-Focused Brief':ti,ab OR 'Solution-Focused Brief Therap*':ti,ab OR 'Psychotherap*, Short Term':ti,ab OR 'Short Term Psychotherap*':ti,ab OR (Therap*, (Reality OR Schema OR Socioenvironmental OR Situational OR Milieu)):ti,ab OR ((Reality OR Schema OR Socioenvironmental OR Situational OR Milieu) Therap*):ti,ab OR 'Therapeutic Communit*':ti,ab OR 'Communit*, Therapeutic':ti,ab OR ((Group$ OR Couple$) Therap*):ti,ab OR (Therap*, (Group$ OR Couple$)):ti,ab OR ((Marriage OR Marital OR Family) Therap*):ti,ab OR (Therap*, (Marriage OR Marital OR Family)):ti,ab OR 'Therap*, Drama':ti,ab OR 'Drama Therap*':ti,ab OR 'Dramatherap*':ti,ab OR 'Role Playing$':ti,ab OR 'Playing$, Role':ti,ab OR 'Group$, Sensitivity Training':ti,ab OR 'Training Group$, Sensitivity':ti,ab OR 'Sensitivity Training Group$':ti,ab OR 'Encounter Group$':ti,ab OR 'Group$, Encounter':ti,ab OR 'T Group$':ti,ab OR 'Residential Treatment$':ti,ab OR 'Treatment$, Residential':ti,ab

**#4** '[**Psychological Techniques**](https://www.cochranelibrary.com/advanced-search/mesh#0)'/exp

**#5** (Psychologic* Techni*):ti,ab OR (Techni*, Psychologic*):ti,ab OR 'Psychologic* Interview?':ti,ab OR 'Interview?, Psychologic*':ti,ab

**#6** '[**Psychology, Clinical**](https://www.cochranelibrary.com/advanced-search/mesh#0)'/exp

**#7** (Clinical Psychology):ti,ab

**#8** '[**Sensory Art Therapies**](https://www.cochranelibrary.com/advanced-search/mesh#0)'/exp

**#9** ('Therap*, Sensory Art' OR 'Art Therap*, Sensory' OR 'Stimulation?, Auditory' OR 'Stimulation?, Acoustic' OR 'Auditory Stimulation?'):ti,ab

**#10** #2 OR #3 OR #4 OR #5 OR #6 OR #7 OR #8 OR #9

**#11** 'randomized controlled trial'/exp OR 'Clinical Study'/exp OR 'Clinical trial'/exp OR 'controlled clinical trial'/exp OR 'Case Control Study'/exp OR 'comparative study'/exp OR 'Equivalence Trial'/exp OR 'Pragmatic clinical trial':ab,ti OR 'randomized controlled trial (topic)'/exp OR 'clinical trials (topic)'/exp OR 'controlled clinical trial (topic)'/exp OR 'Equivalence Trial (topic)'/exp OR 'Clinical Trial$, Randomized':ab,ti OR 'Trial$, Randomized Clinical':ab,ti OR 'Comparative Stud*':ab,ti OR 'Practical Clinical Trial$':ab,ti OR 'Clinical Trial$, Practical':ab,ti OR 'Trial$, Practical Clinical':ab,ti OR 'Pragmatic Trial$':ab,ti OR 'Trial$, Pragmatic':ab,ti OR 'Pragmatic Clinical Trial$':ab,ti OR 'Random allocation':ab,ti OR 'Allocation,Random':ab,ti OR 'Randomization'/exp OR 'Random*':ab,ti OR 'Placebo':ab,ti OR 'trial$':ab,ti OR 'Case-control':ab,ti OR 'Case Control':ab,ti OR ((Case-Comparison OR Case-Compeer OR Case-Referrent OR 'Case Referrent' OR Case-Base OR 'Case Base') Stud*):ab,ti OR (Stud*, (Case-Comparison OR Case-Compeer OR Case-Referrent OR 'Case Referrent' OR Case-Base OR 'Case Base')):ab,ti OR 'comparative study':ab,ti

**#12** 'animal experimentation'/exp OR 'animal':ab,ti OR 'mouse':ab,ti OR 'mice':ab,ti OR 'rats':ab,ti

**#13** #11 NOT #12

**#14** #1 AND #10 AND #13 AND ([article]/lim OR [article in press]/lim) AND [humans]/lim AND [clinical study]/lim AND ([controlled clinical trial]/lim OR [randomized controlled trial]/lim) (2,333 results)

**S5. Trial characteristics**

**S5 Figure** Study arm and sample size distribution of psychotherapies.


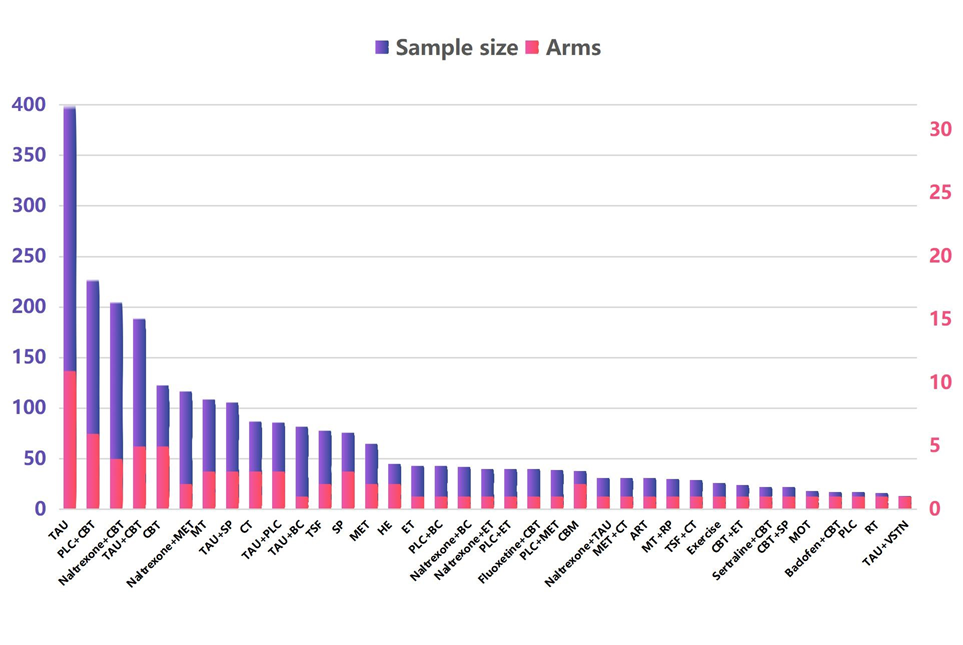


**Abbreviations:** TAU, treatment as usual; SP, supportive psychotherapy; PLC, placebo; CBT, cognitive behavioral therapy; MET, motivational enhancement therapy; TSF, twelve-step facilitation; RT, relaxation therapy; ET, exposure therapy; BC, brief counseling; VSTN, Visual Short-Time Neurofeedback; ART, affect regulation training; MT, marital therapy; CT, couple therapy; RP, relapse prevention.

**S5 Table** Characteristics of included trials

| **Study** | **Country** | **Diagnosis*** | **Criterion** | **Comorbidity** | **Outcome*** | **Sample** | **Age*** | **Gender*** | **Arms*** | **Inpatient** | **Education years** | **Occupational status** | **Marital status*** | **Special groups** |
| --- | --- | --- | --- | --- | --- | --- | --- | --- | --- | --- | --- | --- | --- | --- |
| 1-Agyapong 201220 | Ireland | AUD | DSM-IV | Depression | DDD  Craving | 26  28 | 48±10.4  49±10.5 | 12/14  13/15 | TAU + SP  TAU | No | 15.2±2.1  15.4±2.3 | 15/11  19/9 | 18/8  18/10 | Common |
| 2-Anton 1999◊21 | USA | AD | DSM-III-R | N/A | PDA  DDD  Craving | 68  63 | 41±10  44±10 | 47/21  46/17 | Naltrexone + CBT  PLC + CBT | No | 14±3  14±3 | 55/13◊  51/12 | 45/23  44/19 | Common |
| 3-Anton 2005◊22 | USA | AD | DSM-IV | N/A | PDA  DDD | 39  41  41  39 | 44±8  43±10  45±11  43±9 | 31/8  30/11  30/11  30/9 | Naltrexone + CBT  Naltrexone + MET  PLC + CBT  PLC+ MET | No | 14±2  14±3  15±2  15±2 | 36/3◊  30/11  38/3  36/3 | 13/26  19/22  17/24  14/25 | Common |
| 4-Balldin 200323 | Sweden | AD | DSM-IV | N/A | DDD  Craving | 25  31  30  32 | 50±7  48±8  50±8  51±8 | 21/4  27/4  23/7  29/3 | Naltrexone + CBT  Naltrexone + TAU  PLC + CBT  TAU + PLC | No | N/A | 20/5  20/11  22/8  23/9 | 15/10  15/16  19/11  17/15 | Common |
| 5-Blondell 201124 | USA | AD | DSM-IV | N/A | PDA | 44  39  42 | 44.96±10.75  44.48±12.36  46.58±9.92 | 35/15  33/17  30/20 | MET  TSF  TAU | Yes | N/A | 34/16  36/14  34/16 | 15/35  19/31  19/31 | Common |
| 6-Brown 199725 | USA | AD | DSM-III-R | N/A | PDA | 19  16 | 38±7.2 | 25/10 | CBT  RT | N/A | 13.2±2.5 | N/A | N/A | Common |
| 7-Cucciare 2013◊26 | USA | Alcohol misuse | AUDIT-C | N/A | DDD | 82  68 | 60.8±14.1  57.7±15.9 | 79/10  68/10 | TAU + BC  TAU | No | N/A | 29/60◊  33/45◊ | 40/49  31/47 | Veterans |
| 8-Davidson 2007◊27 | USA | AD | DSM-IV | N/A | PDA | 73  76 | NA◊ | 45/28  49/27 | Naltrexone + CBT  Naltrexone + MET | No | N/A | 54/19  53/23 | 34/39  31/45 | Common |
| 9-Garland 201028 | USA | AD | DSM-IV | N/A | Craving | 18  18 | 39.9±8.7  40.7±10.2 | 22/5  20/6 | MOT  SP | N/A | N/A | N/A | N/A | Common |
| 10-Foa 201329 | USA | AD | DSM-IV | PTSD | Craving | 40  40  42  43 | 40.1±3.4  44.7±2.95  44.9±3.05  41.2±2.65 | 27/13  27/13  26/16  28/15 | Naltrexone + ET  PLC + ET  Naltrexone + BC  PLC + BC | N/A | N/A | N/A | N/A | Common |
| 11-Farren 201530 | Ireland | AD | DSM–IV | N/A | DDD  Craving | 20  15 | 45±14.2  45±14.7 | 13/7  12/3 | TAU + CBT  TAU + PLC | Yes | 15.8±3.3  15.1±2.4 | 11/9  9/6 | 12/8  9/6 | Common |
| 12-Hien 2015◊31 | USA | AUD | DSM–IV–TR | PTSD | DDD | 22  25 | 42.2±9.8  42.5±8.5 | 6/26  7/30 | Sertraline + CBT  PLC + CBT | No | 13.7±3.1  13.0±2.0 | 23/8/1◊  30/4/3◊ | 9/23  5/32 | Common |
| 13-Kiluk 201632 | USA | AUD | DSM-IV | N/A | PDA | 21  21  24 | 41.9±11.2  43.9±13.1  42.3±11.6 | 15/7  15/9  14/8 | TAU + CBT  CBT  TAU | N/A | N/A | 8/14  5/19  5/17 | 3/19  2/22  1/21 | Common |
| 14-Kranzler 199533 | USA | AD | DSM-III-R | N/A | DDD | 40  45 | 40.1±8.6 | 81/20 | Fluoxetine + CBT  PLC + CBT | No | 14.9±2.8 | 92/9 | N/A | Common |
| 15-Lackner 201634 | Austria | AD | ICD–10 | N/A | Craving | 13  12 | 38.9±9.1  40.5±8.8 | 13/0  13/0 | TAU + VSTN  TAU | No | N/A | N/A | N/A | Male |
| 16-Lucht 201435 | Germany | AD | ICD–10 | N/A | DDD | 42  48 | 45.50±9.40  46.22±9.64 | 33/9  31/7 | TAU + SP  TAU | No | N/A | 24/18  28/10 | 17/25  10/28 | Common |
| 17-Markowitz 200836 | USA | AUD | DSM-IV | Dysthymic disorder | PDA | 14  12 | 40.8±11.1  35.7±9.5 | 11/3  7/5 | CBT  SP | No | N/A | 9/5  11/1 | 3/11  3/9 | Common |
| 18-Meshesha 2020◊37 | USA | AUD | DSM-IV | N/A | DDD | 21  16 | 37.83±12.26  38.78±13.56 | 15/7/1◊  13/5/0◊ | MET  HE | No | N/A | N/A | N/A | Common |
| 19-McCrady 2009◊38 | USA | AUD | DSM–IV | N/A | PDA | 45  48 | 44.78±9.14  45.31±9.31 | 0/50  0/52 | CT  CBT | No | 14.57±2.56  14.54±2.61 | 15/7/18/10◊  11/11/14/16◊ | 50/0  52/0 | Female |
| 20-McCrady 1999◊39 | USA | AUD | DSM-III-R | N/A | PDA | 29  31  30 | 39.44±10.27 | 29/0  31/0  30/0 | TSF + CT  MET + CT  CT | No | 13.40±2.34 | 41/49◊ | 78/2 | Male |
| 21-O'Farrell 199340 | USA | AUD | DSM-III-R | N/A | PDA | 30  29 | 45.57±8.26  43.24±7.65 | 30/0  29/0 | MT + RP  MT | No | 12.30±2.07  13.17±2.59 | 26/4  20/9 | 30/0  29/0 | Male |
| 22-O'Farrell 1992◊41 | USA | AUD | MAST | N/A | PDA | 10  12  12 | 40s | 10/0  12/0  12/0 | MT  CT  TAU | No | NA◊ | N/A | 10/0  12/0  12/0 | Male |
| 23-Walitzer 201512 | USA | AD | DSM-IV | N/A | PDA  DDD | 31  39 | 45.9±9.0  46.7±8.6 | 19/17  23/17 | ART  TSF | No | 14.8±3.4  13.9±2.5 | 25/11  22/18 | 22/14  29/11 | Common |
| 24-Zweben 198842 | Canada | Alcohol abuse | MAST | N/A | PDA | 70  46 | 43.6 ±10.6  41.1±10.1 | 58/12  38/8 | MT  SP | No | 12.6±2.9  12.9±3.6 | 55/15  41/5 | 70/0  46/0 | Couples |
| 25-Ponizovsky 201543 | Israel | AD | ICD-10 | N/A | PDA  Craving | 17  23 | 42.6±9.6  44.7±8.7 | 24/8  24/8 | Baclofen + CBT  PLC + CBT | No | 11.5±1.2  11.7±3.7 | 14/18  12/20 | 15/17  19/13 | Common |
| 26-Rose 201544 | USA | AD | DSM-IV | N/A | DDD | 69  70 | 49.17±10.70  48.12±9 | 43/38  41/36 | TAU + CBT  TAU | No | N/A | 53/28  48/29 | 54/27  48/29 | Common |
| 27-Rupp 201245 | Austria | AD | DSM-IV | N/A | Craving | 20  17 | 45.2±10.5  45.5±8.8 | 11/9  15/6 | TAU + CBT  TAU | No | 10.4±3.0  9.7±2.5 | N/A | N/A | Common |
| 28-Nadkarni 201946 | India | AUD | AUDIT | N/A | PDA | 59  62 | 43.3±11.5  39.7±10.4 | 69/0  66/0 | TAU + CBT  TAU | N/A | N/A | 57/12  56/10 | 51/18  54/12 | Male |
| 29-Morley 201647 | Australia | AD | DSM-IV | Suspicion of anxiety/ depressive disorders | PDA  DDD  Craving | 21  16 | 40.05±8.05  43.13±12.86 | 10/11  10/6 | CBT  TAU | No | N/A | N/A | N/A | Common |
| 30-Nosen 201448 | USA | AD | DSM-IV | PTSD | Craving | 43  29 | 35.37±9.98  32.63±9.75 | 30/22  18/17 | ET  HE | Yes | N/A | 20/32  16/19 | N/A | Common |
| 31-O'Reilly 201949 | Ireland | AUD | DSM-IV | Depression | Craving  DDD | 38/39  33/36 | 49.5±10.4  46.6±10.6 | 24/23  20/28 | TAU + SP  TAU + PLC | No | 15.4±3.2  16±2.4 | 37/9  39/9 | 34/13  33/15 | Common |
| 32-Schneider 201650 | Germany | AD | MINI (1997, according to DSM-III-R) | N/A | Craving | 23  26 | 45.53±12.31  46.56±13.37 | 20/10  22/10 | CBM  Exercise | Yes | 10.68±1.85  10.76±1.94 | N/A | N/A | Common |
| 33-Wiers 201519 | USA | AD | DSM–IV | N/A | Craving | 15  17 | 45.33±6.84  42.88±8.31 | 15/0  17/0 | CBM  PLC | Yes | 10.60±1.45  10.47±1.33 | N/A | N/A | Male |
| 34-Sannibale 201351 | Australia | AUD | DSM-IV | PTSD | PDA  DDD | 24  22 | 41.85±12.62  40.41±11.21 | 14/19  15/14 | CBT + ET  CBT + SP | No | 11.12±1.27  10.66±1.31 | 14/19  14/15 | 10/23  8/21 | Common |

**Note:**

1. Overview of the number of the trials and the sample size:

Total trials 34,12,19,20-51 total sample size 2646, looped trials 23,12,20-26,30,31,33-35,38-41,44-47,49 sample size 1928.

DDD trials 15,12,20-23,26,30,31,33,35,37,44,47,49,51 sample size 1274; looped trials 12,20-23,26,30,31,33,35,44,47,49 sample size 1121.

PDA trials 17,12,21,22,24,25,27,32,36,38-41,42-43,46,47,51 sample size 1398; looped trials 10, 12,24,25,38-41,46,47 sample size 780.

Craving trials 14,19,20,21,23,28,29,34,43,45,47-50 sample size 902; looped trials 6, 30,34,45,47,49 sample size 259.

1. Special stratification of demographic characteristics in the table:

Davidson 2007◊: age [age group(num. of participants)]: Naltrexone + CBT: 18-29(6); 30-41(21); 42-53(43); 54-65(4); 66-77(2)

Naltrexone + MET: 18-29(3); 30-41(31); 42-53(38); 54-65(4); 66-77(0)

O'Farrell 1992◊: education years can’t be found in the original article but “100% high school educated” was recorded.

Meshesha 2020◊: gender means n(male)/n(female)/n(transgender).

McCrady 2009◊: occupational status means Homemaker/Employed part-time/Employed full-time/Else

McCrady 1999◊: occupational status means Unskilled laborers, machine operators, manual laborers or unskilled craftsmen/the remainder had higher occupational levels

Hien 2015◊: occupational status means Employed/Unemployed/Else

Cucciare 2013◊: occupational status means Working or in school/Else

Anton 1999◊ and Anton 2005◊: occupational status means Full time job/Else

1. Arms*: abbreviation for therapies: TAU=treatment as usual; SP=supportive psychotherapy; PLC=placebo; CBT=cognitive behavioral therapy; MET=motivation enhancement therapy; TSF=twelve-step facilitation; RT=relaxation therapyl; MOT=mindfulness-oriented therapy; ET=exposure therapy; HE=health education; BC=brief counseling; VSTN=Visual Short-Time Neurofeedback; ART=affect regulation training; MT=marital therapy; CT=couple therapy; RP=relapse prevention
2. Diagnosis*: alcohol- related diagnosis
3. Sample*: sample for analysis
4. Age*: [Years: Mean (SD)]
5. Gender*: n(male)/n(female)
6. Marital status*: Married or cohabiting/Not married and solitary
7. Outcome*: the outcomes which can be looped is colored.
8. Outcome instruments:

①DDD: Time-Line Follow-Back procedure (TLFB) (Morley 2016, Sannibale 2013, Rose 2015, Meshesha 2020, Kranzler 1995, Agyapong 2012, Hien 2015, Cucciare 2013, Walitzer 2015, Anton 1999, Farren 2015, Balldin 2003);52-58 Form-90 (Lucht 2014, Anton 2005)59,60

②PDA: TLFB(Morley 2016, Zweben 1988, Sannibale 2013, McCrady 2009, Kiluk 2016, Markowitz 2008, O'Reilly 2019, Nadkarni 2019, Walitzer 2015, Anton 1999, Ponizovsky 2015, Brown 1997, McCrady 1999, Davidson 2007, Blondell 2011);52,53,55-58,61-63 Time-line drinking behavior interview(O'Farrell 1992, O'Farrell 1993);64 Form-90(Anton 2005)60

③Craving: Desire for Alcohol Questionnaire (DAQ)(Wiers 2015);65 German Version of Obsessive-Compulsive Drinking Scale (OCDS-G, Mann, K., 2000)(Schneider 2016, Rupp 2012);66 OCDS (Anton et al., 1995, 1996)(Agyapong 2012, Anton 1999, O'Reilly 2019, Ponizovsky 2015, Balldin 2003, Farren 2015, Morley 2016);67,68 Three Likert scale items (Kozlowski, et al, 1996) (Nosen 2014);69 Lackner 2016 Alcohol Craving Questionnaire Revised Form (ACQ-R, Raabe A, et al., 2005);70 Penn Alcohol Craving Scale (PACS, Flannery, et al, 1999, 2001)(Foa 2013, Garland 2010).71,72

**S6. Risk of bias assessment**

**S6 Figure A** Risk of bias summary.


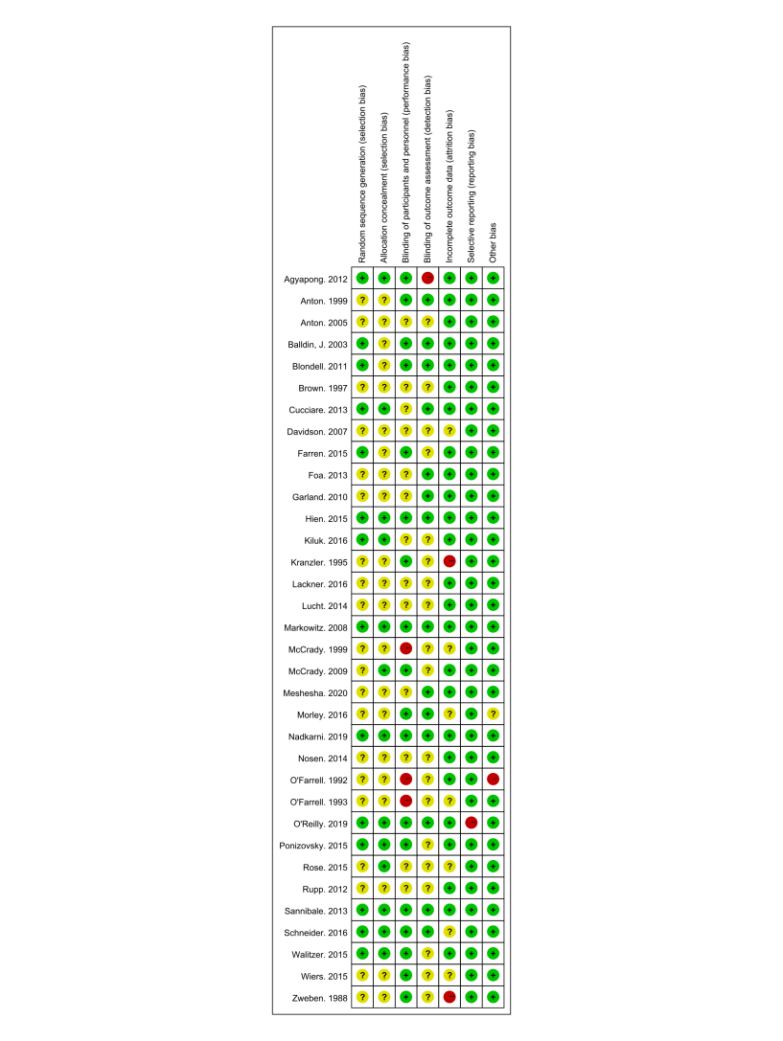


**Note:** Review the judgements about each risk of bias item for each included study.

**S6 Figure B**Risk of bias summary.


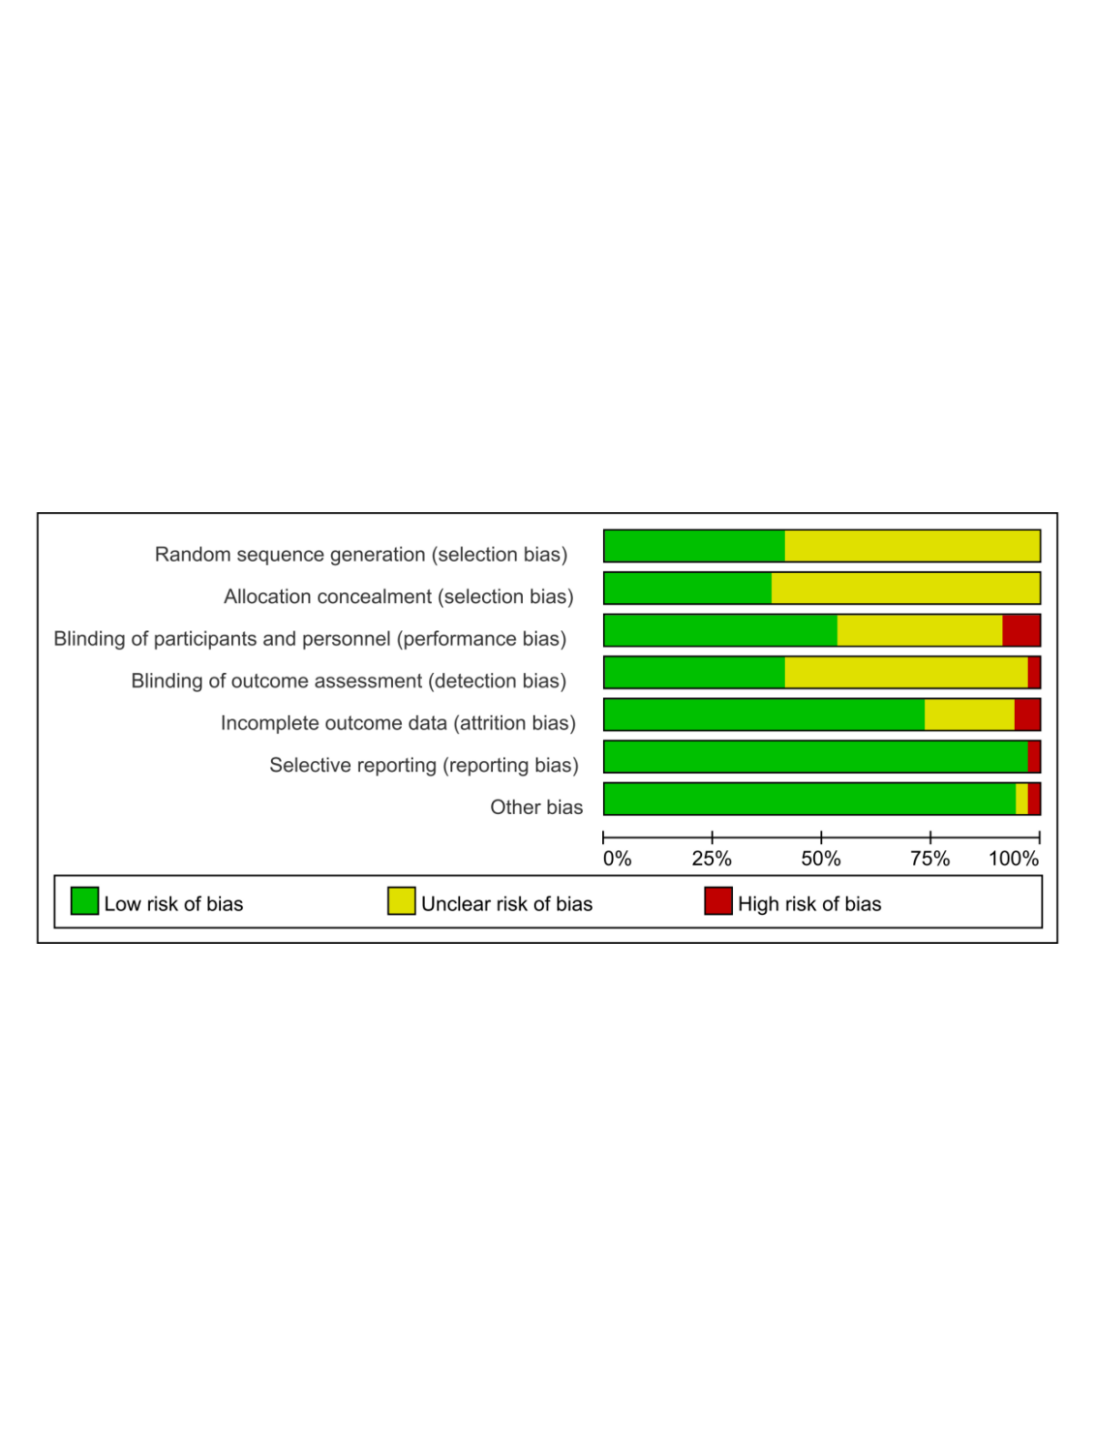


**Note:** Review the judgements about each risk of bias item for each included study.

**S6 Table** Cochrane risk of bias tool

| Study | Random sequence  generation | Allocation  concealment | Blinding of  participants and  personnel | Blinding of outcome  assessment | Incomplete outcome  data | Selective outcome  reporting |
| --- | --- | --- | --- | --- | --- | --- |
| Agyapong 2012 | random number table | participants were randomly assigned by odd and even numbers in the random sequence generated by Excel | using single blind | the outcome was evaluated with blinding, but the blinding may have been broken | complete | no |
| Anton 1999 | no specific method was mentioned | not mentioned | using double blind | not mentioned, but not caused significant bias | complete | no |
| Anton 2005 | no specific method was mentioned | not mentioned | not mentioned | not mentioned | complete | no |
| Balldin 2003 | random number table | the envelope method is mentioned, but the sealing and light transmission are not mentioned | using double blind | right blind method for Statisticians existed | complete | no |
| Blondell 2011 | random sequence | using a 2:2:2 block randomization procedure | using double blind | right blind method for Statisticians existed | complete | no |
| Brown 1997 | not clear, and difficult to judge whether it is correct or not | not mentioned | not mentioned | not mentioned | complete | no |
| Cucciare 2013 | random sequence | center random | not mentioned | right blind method for Statisticians existed | complete | no |
| Davidson 2007 | no specific method was mentioned | not mentioned | not mentioned | not mentioned | not mentioned | no |
| Garland 2010 | no specific method was mentioned | not mentioned | not mentioned | blind for assessor | complete | no |
| Foa 2013 | no specific method was mentioned | not mentioned | not mentioned | blind for assessor | complete | no |
| Farren 2015 | random number table | not mentioned | using double blind | not mentioned | complete | no |
| Hien 2015 | randomization procedure | randomization procedure | using double blind | blind for assessor | complete | no |
| Kiluk 2016 | using a computerized urn randomization program | randomization procedure | not mentioned | not mentioned | complete | no |
| Kranzler 1995 | no specific method was mentioned | not mentioned | using double blind | not mentioned | missing and incomplete without explanation | no |
| Lackner 2016 | no specific method was mentioned | not mentioned | not mentioned | not mentioned | complete | no |
| Lucht 2014 | no specific method was mentioned | not mentioned | not mentioned | not mentioned | complete | no |
| Markowitz 2008 | using computerized randomization | random sequence | using single blind for therapist | blind for assessor | complete | no |
| Meshesha 2020 | no specific method was mentioned | not mentioned | not mentioned | selected and reviewed by two trained independent coders | complete | no |
| McCrady 2009 | no specific method was mentioned | sealed envelopes | because the treatment was a psychosocial treatment, guided by treatment manuals, blinding of the therapists and participants was not possible | not mentioned | intent-to-treat, using the expectation maximization method with the maximum likelihood estimator | no |
| McCrady 1999 | no specific method was mentioned | not mentioned | no blind for patients or researchers, which may lead to bias | not mentioned | the reason of missing follow-up was not reported | no |
| O'Farrell 1993 | no specific method was mentioned | not mentioned | no blind for patients or researchers, which may lead to bias | not mentioned | the number of quitters and assignment method was not mentioned | no |
| O'Farrell 1992 | no specific method was mentioned | not mentioned | no blind for patients or researchers, which may lead to bias | not mentioned | complete | no |
| Walitzer 2015 | urn random assignment, carried out by the project coordinator via a computerized program | centeral randomization | interviewers were blind to intervention condition | not mentioned | utilized the intent-to-treat sample | no |
| Zweben 1988 | no specific method was mentioned | not mentioned | no blind for patients or researchers, but it did not lead to bias | not mentioned | there was an attrition rate of 47% within the study; the number and reason of missing between groups were not balanced | no |
| Ponizovsky 2015 | using a random number generator | using a random number generator | using double blind | not mentioned | complete | no |
| Rose 2015 | no specific method was mentioned | within each stratum, a blocked randomization was used to insure that an equal number of subjects were randomized to each of the two treatment conditions within each sequential block of 10 participants | not mentioned | not mentioned | not mentioned | no |
| Rupp 2012 | no specific method was mentioned | not mentioned | not mentioned | not mentioned | complete | no |
| Nadkarni 2019 | a randomization list in randomly sized blocks (two to four), stratified by PHC, was generated by a statistician independent of the trialusing sequential number | using sequential numbered opaque sealed envelopes | using single blind | blind for assessor | to handle missing data, following the analyses strategy of adjusting for baseline variables associated with drop-out | no |
| Morley 2016 | no specific method was mentioned | the envelope method is mentioned, but the sealing and light transmission are not mentioned | no blind for patients or researchers, but it did not lead to bias | blind for assessor | the number of quitters was reported, but no assignment method was mentioned | no |
| Nosen 2014 | no specific method was mentioned | not mentioned | not mentioned | not mentioned | three missing values on the post-treatment PANAS (n ¼ 2) were replaced with predicted values using the ExpectationMaximization (EM) algorithm | no |
| O'Reilly 2019 | using a random number generator | using a random number generator | no blind for patients or researchers, but it did not lead to bias | blind for assessor | a loss to follow-up analysis suggested that participants were missing at random as their baseline scores did not differ significantly from those participants who completed the follow-up assessments, so pairwise deletion rather than data imputation was used to handle missing data. | in the protocol it stated "cumulative abstinence duration" would be calculated at each follow-up period; however, here we report the opposite—"number of drinking days". |
| Schneider 2016 | using a randomized plan that was developed by a statistician | A person who was not involved in the assessments or the intervention informed the patients of their allocation and only this person had access to the randomized plan | no blind for patients or researchers, but it did not lead to bias | blind for assessor | not mentioned | no |
| Wiers 2015 | no specific method was mentioned | not mentioned | using double blind | not mentioned | not mentioned | no |
| Sannibale 2013 | random numbers system | treatment allocation was concealed in sequentially numbered, double-lined, opaque, security-sealed envelopes, held centrally | no blind for patients or researchers, but it did not lead to bias | follow-up assessments were conducted by independent clinicians who were unaware of the participants' treatment condition and did not have access to participant clinical or supervision notes or treatment allocation | complete | no |

**S7. Pairwise meta-analysis**

**S7 Table** Pairwise meta-analysis

| **a. Active vs sham** | |  | **Change of DDD** | **PDA** | **Change of craving** |
| --- | --- | --- | --- | --- | --- |
| **Comparison** | | **Trial (first author)** | **SMD**§ (95% CI) | **SMD**§ (95% CI) | **SMD**§ (95% CI) |
| MET | vs TAU | McCrady. 1999 | — | -0.27(-0.69,0.16) | — |
|  |  | Summary effect | — | -0.27(-0.69,0.16) | — |
|  |  | Heterogeneity (I2) | — | — | — |
| TSF | vs TAU | Blondell. 2011 | — | -0.28(-0.71,0.16) | — |
|  |  | Summary effect | — | -0.28(-0.71,0.16) | — |
|  |  | Heterogeneity (I2) | — | — | — |
| MT | vs TAU | O'Farrell. 1992 | — | 0.76(-0.11,1.64) | — |
|  |  | Summary effect | — | 0.76(-0.11,1.64) | — |
|  |  | Heterogeneity (I2) | — | — | — |
| TAU+BC | vs TAU | Cucciare. 2013 | 0.12(-0.20,0.44) | — | — |
|  |  | Summary effect | 0.12(-0.20,0.44) | — | — |
|  |  | Heterogeneity (I2) | — | — | — |
| TAU+CBT | vs TAU | Rose2015 | -0.24(-0.57,0.09) |  | — |
|  |  | Nadkarni. 2019 | — | 0.25(-0.11,0.61) | — |
|  |  | Rupp. 2012 | — | — | -0.63(-1.30,0.03) |
|  |  | Summary effect | -0.24(-0.57,0.09) | 0.25(-0.11,0.61) | -0.63(-1.30,0.03) |
|  |  | Heterogeneity (I2) | — | — | — |
| TAU+SP | vs TAU | Agyapong. 2012 | -0.76(-1.31,-0.20) | — | -0.12(-0.65,0.42) |
|  |  | Lucht. 2014 | -0.46(-0.88,-0.04) | — | — |
|  |  | Summary effect | -0.57(-0.91,-0.24) | — | -0.12(-0.65,0.42) |
|  |  | Heterogeneity (I2) | 0% | — | — |
| CBT | vs TAU | Morley. 2016 | -0.29(-0.94,0.37) | 2.76(1.83,3.69) | 2.06(-0.94,5.06) |
|  |  | Summary effect | — | 2.76(1.83,3.69) | 2.06(-0.94,5.06) |
|  |  | Heterogeneity (I2) | — | — | — |
| TAU+VSTN | vs TAU | Lackner. 2016 | — | — | 0.37(-0.42,1.16) |
|  |  | Summary effect | — | — | 0.37(-0.42,1.16) |
|  |  | Heterogeneity (I2) | — | — | — |
| Naltrexone+CBT | vs TAU+PLC | Balldin2003 | -0.20(-0.72,0.33) | — | — |
|  |  | Summary effect | -0.20(-0.72,0.33) | — | — |
|  |  | Heterogeneity (I2) | — | — | — |
| PLC+CBT | vs TAU+PLC | Balldin2003 | -0.01(-0.51,0.48) | — | — |
|  |  | Summary effect | -0.01(-0.51,0.48) | — | — |
|  |  | Heterogeneity (I2) | — | — | — |
| Naltrexone+TAU | vs TAU+PLC | Balldin2003 | 0.19(-0.31,0.68) | — | — |
|  |  | Summary effect | 0.19(-0.31,0.68) | — | — |
|  |  | Heterogeneity (I2) | — | — | — |
| TAU+CBT | vs TAU+PLC | Farren. 2015 | 0.21(-0.46,0.88) | — | 0.67(-0.02,1.36) |
|  |  | Summary effect | 0.21(-0.46,0.88) | — | 0.67(-0.02,1.36) |
|  |  | Heterogeneity (I2) | — | — | — |
| TAU+SP | vs TAU+PLC | O'Reilly. 2019 | 0.26(-0.19,0.72) | — | 0.01(-0.46,0.48) |
|  |  | Summary effect | 0.26(-0.19,0.72) | — | 0.01(-0.46,0.48) |
|  |  | Heterogeneity (I2) | — | — | — |
| **b. Active vs active** | |  | **Change of DDD** | **PDA** | **Change of craving** |
| **Comparison** | | **Trial (first author)** | **SMD**§ (95% CI) | **SMD**§ (95% CI) | **SMD**§ (95% CI) |
| Naltrexone+CBT | vs PLC+CBT | Anton. 1999 | **-0.35(-0.70,-0.01)** | — | — |
|  |  | Anton. 2005 | -0.06(-0.50,0.38) | — | — |
|  |  | Balldin, J. 2003 | -0.19(-0.72,0.34) | — | — |
|  |  | Summary effect | -0.23(-0.47,0.01) | — | — |
|  |  | Heterogeneity (I2) | 0% | — | — |
| Naltrexone+MET | vs PLC+CBT | Anton2005 | -0.24(-0.68,0.19) | — | — |
|  |  | Summary effect | -0.24(-0.68,0.19) | — | — |
|  |  | Heterogeneity (I2) | — | — | — |
| PLC+MET | vs PLC+CBT | Anton. 2005 | 0.04(-0.40,0.47) | — | — |
|  |  | Summary effect | 0.04(-0.40,0.47) | — | — |
|  |  | Heterogeneity (I2) | — | — | — |
| Naltrexone+TAU | vs PLC+CBT | Balldin2003 | 0.21( -0.30,0.71) | — | — |
|  |  | Summary effect | 0.21( -0.30,0.71) | — | — |
|  |  | Heterogeneity (I2) | — | — | — |
| Sertraline+CBT | vs PLC+CBT | Hien2015 | 0.21(-0.36,0.79) | — | — |
|  |  | Summary effect | 0.21(-0.36,0.79) | — | — |
|  |  | Heterogeneity (I2) | — | — | — |
| Fluoxetine+CBT | vs PLC+CBT | Kranzler1995 | -0.04(-0.46,0.39) | — | — |
|  |  | Summary effect | -0.04(-0.46,0.39) | — | — |
|  |  | Heterogeneity (I2) | — | — | — |
| Naltrexone+CBT | vs Naltrexone+TAU | Balldin2003 | -0.36(-0.89,0.17) | — | — |
|  |  | Summary effect | -0.36(-0.89,0.17) | — | — |
|  |  | Heterogeneity (I2) | — | — | — |
| Naltrexone+CBT | vs Naltrexone+MET | Anton2005 | 0.20(-0.24,0.64) | — | — |
|  |  | Summary effect | 0.20(-0.24,0.64) | — | — |
|  |  | Heterogeneity (I2) | — | — | — |
| Naltrexone+CBT | vs PLC+MET | Anton2005 | -0.10(-0.54,0.35) | — | — |
|  |  | Summary effect | -0.10(-0.54,0.35) | — | — |
|  |  | Heterogeneity (I2) | — | — | — |
| Naltrexone+MET | vs PLC+MET | Anton2005 | -0.26(-0.70,0.18) | — | — |
|  |  | Summary effect | -0.26(-0.70,0.18) | — | — |
|  |  | Heterogeneity (I2) | — | — | — |
| TSF | vs ART | Walitzer. 2015 | — | 0.34(-0.14,0.81) | — |
|  |  | Summary effect | — | 0.34(-0.14,0.81) | — |
|  |  | Heterogeneity (I2) | — | — | — |
| SP | vs MT | Zweben. 1988 | — | -0.23(-0.60,0.14) | — |
|  |  | Summary effect | — | -0.23(-0.60,0.14) | — |
|  |  | Heterogeneity (I2) | — | — | — |
| MT+RP | vs MT | O'Farrell. 1993 | — | 0.16(-0.35,0.67) | — |
|  |  | Summary effect | — | 0.16(-0.35,0.67) | — |
|  |  | Heterogeneity (I2) | — | — | — |
| CBT | vs CT | McCrady. 2009 | — | -0.20(-0.61,0.21) | — |
|  |  | Summary effect | — | -0.20(-0.61,0.21) | — |
|  |  | Heterogeneity (I2) | — | — | — |
| TSF+CT | vs CT |  | — | -0.32(-0.83,0.19) | — |
|  |  | Summary effect | — |  | — |
|  |  | Heterogeneity (I2) | — |  | — |
| MET+CT | vs CT | McCrady. 1999 | — | 0.01(-0.49,0.51) | — |
|  |  | Summary effect | — | 0.01(-0.49,0.51) | — |
|  |  | Heterogeneity (I2) | — | — | — |
| TSF+CT | vs MET+CT |  | — | -0.33(-0.84,0.18) | — |
|  |  | Summary effect | — |  | — |
|  |  | Heterogeneity (I2) | — |  | — |
| CBT | vs RT | Brown. 1997 | — | 0.58(-0.10,1.27) | — |
|  |  | Summary effect | — | 0.58(-0.10,1.27) | — |
|  |  | Heterogeneity (I2) | — | — | — |
| MET | vs TSF | Blondell. 2011 | — | 0.02(-0.41,0.45) | — |
|  |  | Summary effect | — | 0.02(-0.41,0.45) | — |
|  |  | Heterogeneity (I2) | — | — | — |

**Note:** Summary effect sizes estimated using Fixed-effects meta-analysis. §Except for rows labeled "Heterogeneity (I2)".

**Abbreviations:** SMD, standardised mean difference (Higgins, 2003); TAU, treatment as usual; SP, supportive psychotherapy; PLC, placebo; CBT, cognitive behavioral therapy; MET, motivational enhancement therapy; TSF, twelve-step facilitation; RT, relaxation therapy; ET, exposure therapy; BC, brief counseling; VSTN, Visual Short-Time Neurofeedback; ART, affect regulation training; MT, marital therapy; CT, couple therapy; RP, relapse prevention.

**S8. Ranking probabilities, mean ranks, SUCRA values**

**S8 Figure A**SUCRA Rank of treatments for PDA.

**
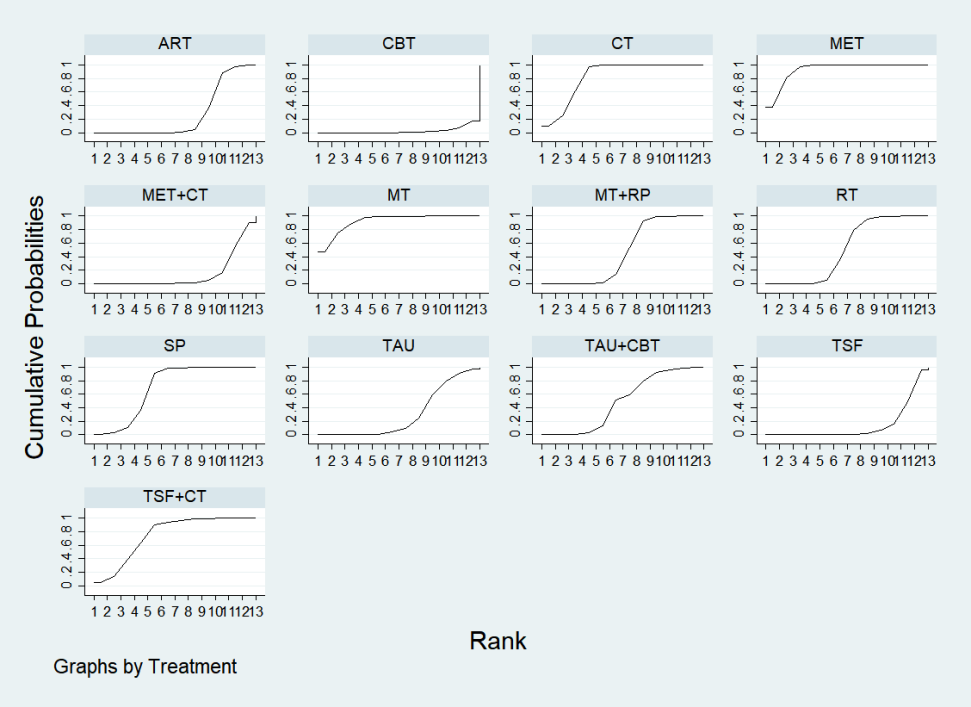
**

**Note:** The higher the SUCRA is, the higher the MeanRank is: (Best)MET, MT, CT, TSF+CT, SP, RT, TAU+CBT, MT+RP, TAU, ART, MET+CT, TSF, CBT.

**Abbreviations:** TAU, treatment as usual; SP, supportive psychotherapy; PLC, placebo; CBT, cognitive behavioral therapy; MET, motivation enhancement therapy; TSF, twelve-step facilitation; RT, relaxation therapy; ART, affect regulation training; MT, marital therapy; CT, couple therapy; RP, relapse prevention.

**S8 Figure B** SUCRA Rank of treatments for change of DDD.


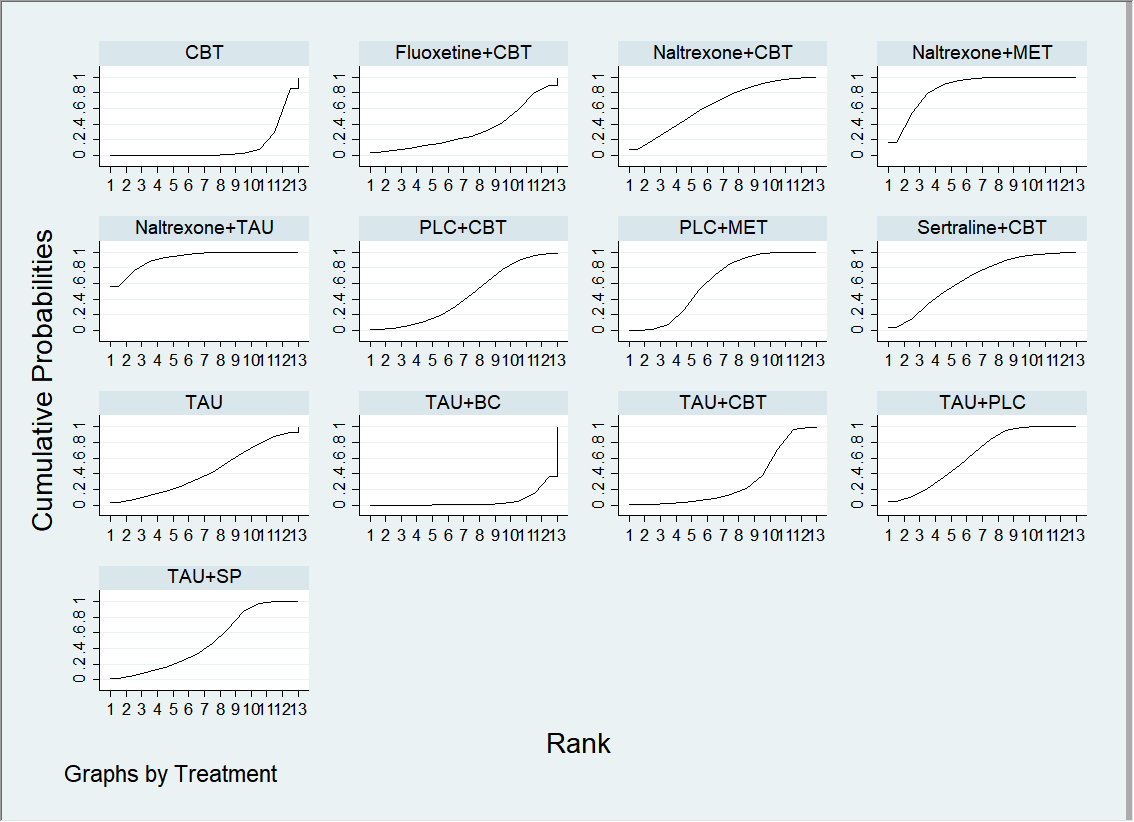


**Note:** The higher the SUCRA is, the higher the MeanRank is: (Best) Naltrexone+TAU, Naltrexone+MET, Sertraline+CBT, Naltrexone+CBT, TAU+PLC, PLC+MET, TAU+SP, PLC+CBT, TAU, Fluoxetine+CBT, TAU+CBT, CBT, TAU+BC.

**Abbreviations:** TAU, treatment as usual; SP, supportive psychotherapy; PLC, placebo; CBT, cognitive behavioral therapy; MET, motivation enhancement therapy; BC, brief counseling.

**S8 Figure C** SUCRA Rank of treatments for change of craving.

**
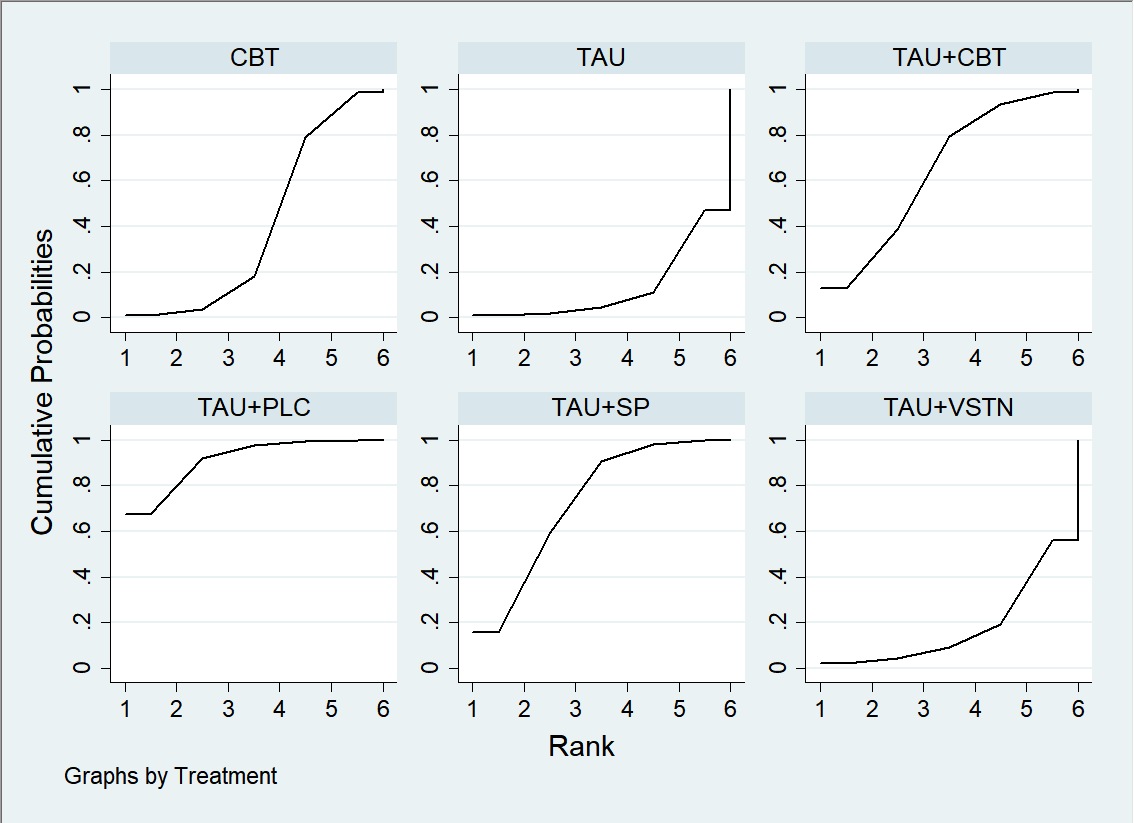
**

**Note:**The higher the SUCRA is, the higher the MeanRank is: (Best) TAU+PLC, TAU+SP, TAU+CBT, CBT, TAU+VSTN, TAU.

**Abbreviations:** TAU, treatment as usual; SP, supportive psychotherapy; PLC, placebo; CBT, cognitive behavioral therapy; VSTN, Visual Short-Time Neurofeedback.

**S8 Table A** Probability distribution of treatment ranking of PDA

| Rank | Treatment | | | | | | | | | | | | |
| --- | --- | --- | --- | --- | --- | --- | --- | --- | --- | --- | --- | --- | --- |
| TAU | ART | CBT | CT | MET+CT | MET | MT+RP | MT | RT | SP | TAU+CBT | TSF+CT | TSF |
| Best | 0 | 0 | 10.2 | 37.1 | 47.2 | 0 | 0 | 0 | 1 | 0 | 0.1 | 4.4 | 0 |
| 2nd | 0 | 0 | 15.2 | 44.8 | 27.7 | 0 | 0 | 0 | 2.7 | 0 | 0.3 | 9.2 | 0 |
| 3rd | 0 | 0 | 36.6 | 14.7 | 15 | 0 | 0 | 0.1 | 6.9 | 0 | 1 | 25.7 | 0 |
| 4th | 0 | 0 | 35.9 | 2.9 | 7.3 | 0 | 0.7 | 0.1 | 25.9 | 0.1 | 2.7 | 24.5 | 0 |
| 5th | 0 | 0 | 2.0 | 0.4 | 2.3 | 0 | 3.5 | 1.4 | 55.6 | 0.6 | 9.3 | 24.8 | 0 |
| 6th | 0.1 | 0.2 | 0.1 | 0 | 0.2 | 0.1 | 31.1 | 12.3 | 6.1 | 4.3 | 39.4 | 5.9 | 0.2 |
| 7th | 0.8 | 0.4 | 0 | 0 | 0.2 | 0.6 | 43.6 | 38.7 | 1.1 | 5.1 | 6.8 | 2.2 | 0.5 |
| 8th | 3.9 | 0.3 | 0 | 0 | 0.1 | 0.9 | 17.2 | 40.3 | 0.5 | 14.8 | 18.9 | 1.9 | 1.2 |
| 9th | 32.3 | 0.9 | 0 | 0 | 0 | 3.9 | 3.3 | 6.3 | 0.2 | 34 | 14.1 | 0.9 | 4 |
| 10th | 50.7 | 1.9 | 0 | 0 | 0 | 11.2 | 0.4 | 0.7 | 0 | 19.5 | 4.3 | 0.2 | 11.1 |
| 11th | 10.1 | 4.0 | 0 | 0 | 0 | 40.8 | 0.1 | 0.2 | 0 | 11.2 | 1.8 | 0 | 31.9 |
| 12th | 1.9 | 9.1 | 0 | 0 | 0 | 33.4 | 0 | 0 | 0 | 7.4 | 1.2 | 0.1 | 46.9 |
| Worst | 0.3 | 83.3 | 0 | 0 | 0 | 9.2 | 0 | 1 | 0 | 2.7 | 0.3 | 0 | 4.2 |

**Note:** According to the ranking probability distribution, the treatment order of probability is as follows：(Best) MET+CT, CT, CBT, RT, TSF+CT, TAU+CBT, MT+RP, MT, SP, TAU, MET, TSF, ART.

**Abbreviations:** TAU, treatment as usual; SP, supportive psychotherapy; PLC, placebo; CBT, cognitive behavioral therapy; MET, motivation enhancement therapy; TSF, twelve-step facilitation; RT, relaxation therapy; ART, affect regulation training; MT, marital therapy; CT, couple therapy; RP, relapse prevention.

**S8 Table B** Probability distribution of treatment ranking of change of DDD

| Rank | Treatment | | | | | | | | | | | | |
| --- | --- | --- | --- | --- | --- | --- | --- | --- | --- | --- | --- | --- | --- |
| TAU | CBT | Fluoxetine+CBT | Naltrexone+CBT | Naltrexone+MET | Naltrexone+TAU | PLC+CBT | PLC+MET | Sertraline+CBT | TAU+BC | TAU+CBT | TAU+PLC | TAU+SP |
| Best | 0 | 4.2 | 8.3 | 17.5 | 55.4 | 1.2 | 0 | 3.8 | 2.9 | 0 | 0.3 | 4.1 | 2.2 |
| 2nd | 0 | 2.7 | 9.8 | 37.8 | 20.8 | 1.8 | 1 | 11.5 | 3.4 | 0 | 0.6 | 7.2 | 3.3 |
| 3rd | 0 | 2.7 | 13.2 | 24.3 | 10.2 | 3.8 | 7 | 16.5 | 4.9 | 0 | 0.7 | 12 | 4.6 |
| 4th | 0 | 3.1 | 14.3 | 11.4 | 5.7 | 6.1 | 18.7 | 14.5 | 5 | 0 | 1.6 | 13.8 | 5.7 |
| 5th | 0 | 3.3 | 12.1 | 5.1 | 3.3 | 6.7 | 24.9 | 13.4 | 6.5 | 0.1 | 2.2 | 14.5 | 7.8 |
| 6th | 0.1 | 4.1 | 11.3 | 2.2 | 1.7 | 10.6 | 21.3 | 11.1 | 8.8 | 0.1 | 3.2 | 16.6 | 9 |
| 7th | 0.3 | 5.5 | 9.3 | 1 | 1.6 | 16.1 | 12.9 | 9.6 | 9.8 | 0.1 | 4.9 | 17 | 11.8 |
| 8th | 0.5 | 6.7 | 7.9 | 0.4 | 0.6 | 16.8 | 7.9 | 7.5 | 12.8 | 0.5 | 8.2 | 10.4 | 19.9 |
| 9th | 1.3 | 10.7 | 6.3 | 0.1 | 0.3 | 14.8 | 4 | 5.7 | 12.9 | 0.9 | 16.2 | 3.5 | 23.3 |
| 10th | 4.7 | 17.2 | 4 | 0.1 | 0.2 | 10.8 | 1.5 | 3.5 | 11.7 | 3 | 32.6 | 0.7 | 10 |
| 11th | 23.9 | 19.8 | 1.9 | 0 | 0 | 6.5 | 0.6 | 1.6 | 8.4 | 8.9 | 25.6 | 0.2 | 2.5 |
| 12th | 54.9 | 9.1 | 1.1 | 0 | 0.1 | 3.1 | 0.2 | 0.8 | 5.7 | 21.9 | 3.1 | 0 | 0.1 |
| Worst | 14.2 | 10.9 | 0.4 | 0 | 0 | 1.9 | 0 | 0.5 | 7.1 | 64.3 | 0.7 | 0 | 0 |

**Note:** According to the ranking probability distribution, the treatment order of probability is as follows：(Best) Naltrexone+MET, Naltrexone+CBT, PLC+MET, PLC+CBT, TAU+PLC, Fluoxetine+CBT, Naltrexone+TAU, TAU+SP, TAU+CBT, CBT, TAU, TAU+BC, Sertraline+CBT.

**Abbreviations:** TAU, treatment as usual; SP, supportive psychotherapy; PLC, placebo; CBT, cognitive behavioral therapy; MET, motivation enhancement therapy; BC, brief counseling.

**S8 Table C** Probability distribution of treatment ranking of change of craving

| Rank | Treatment | | | | | |
| --- | --- | --- | --- | --- | --- | --- |
| TAU | CBT | TAU+CBT | TAU+PLC | TAU+SP | TAU+VSTN |
| Best | 0.8 | 0.8 | 12.8 | 67.5 | 15.7 | 2.3 |
| 2nd | 2.8 | 1 | 25.9 | 24.3 | 44 | 2 |
| 3rd | 14.4 | 2.8 | 40.6 | 6 | 31.1 | 5 |
| 4th | 61.1 | 6.3 | 14 | 1.5 | 7.1 | 10 |
| 5th | 19.4 | 36 | 5.4 | 0.5 | 1.9 | 36.8 |
| Worst | 1.4 | 53 | 1.3 | 0.1 | 0.2 | 43.9 |

**Note:** According to the ranking probability distribution, the treatment order of probability is as follows：(Best) TAU+PLC, TAU+SP, TAU+CBT, TAU, TAU+VSTN, CBT.

**Abbreviations:** TAU, treatment as usual; SP, supportive psychotherapy; PLC, placebo; CBT, cognitive behavioral therapy; VSTN, Visual Short-Time Neurofeedback.

**S9. Forest plot**

**S9 Figure A(a)** Summarized forest plot of direct comparison for PDA.

**
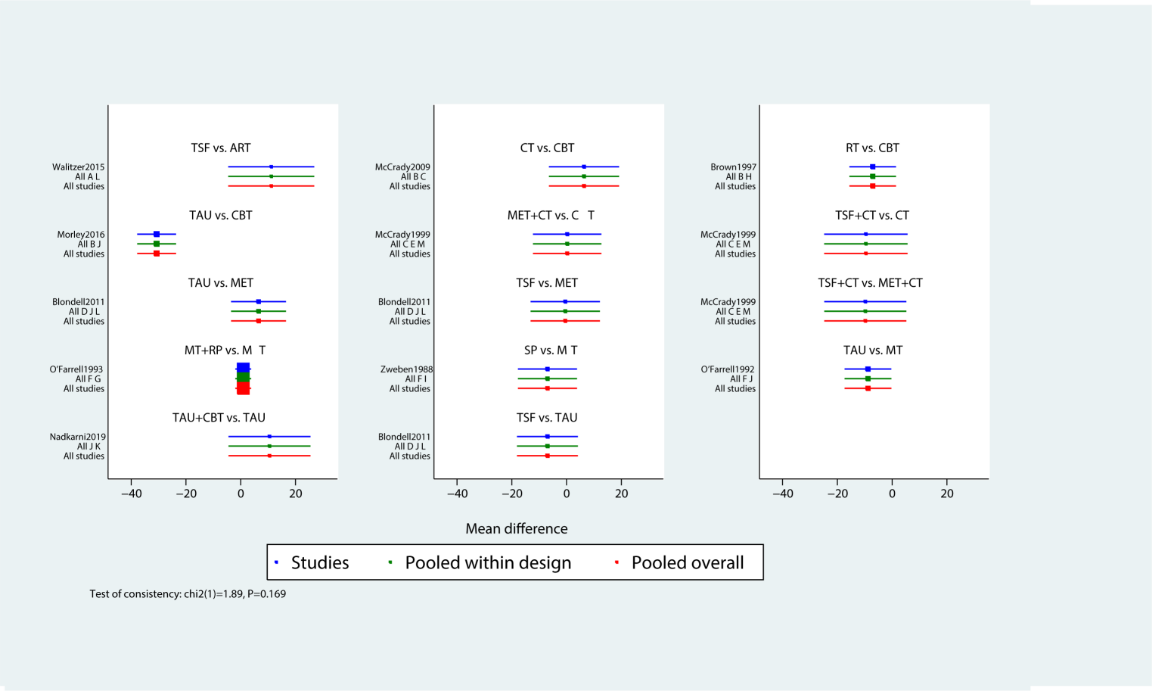
**

**Note:** Having fit both consistency and inconsistency models, a forest plot was produced. Blue represents the effect size (ES) and confidence interval (CI) of each trial, green represents the ES and CI of the same comparative study design, and red represents the ES and CI of the network meta-analysis. The combined results pooled within design are the results of inconsistency models, and the combined results pooled overall are the results of consistency models. There were no pooled studies with the inconsistency model, so the P value of the inconsistency test could not be shown.

**Abbreviations:** TAU, treatment as usual; SP, supportive psychotherapy; CBT, cognitive behavioral therapy; MET, motivation enhancement therapy; TSF, twelve-step facilitation; RT, relaxation therapy; ART, affect regulation training; MT, marital therapy; CT, couple therapy; RP, relapse prevention.

**S9 Figure A(b)** Forest of pairwise comparison for PDA (total).


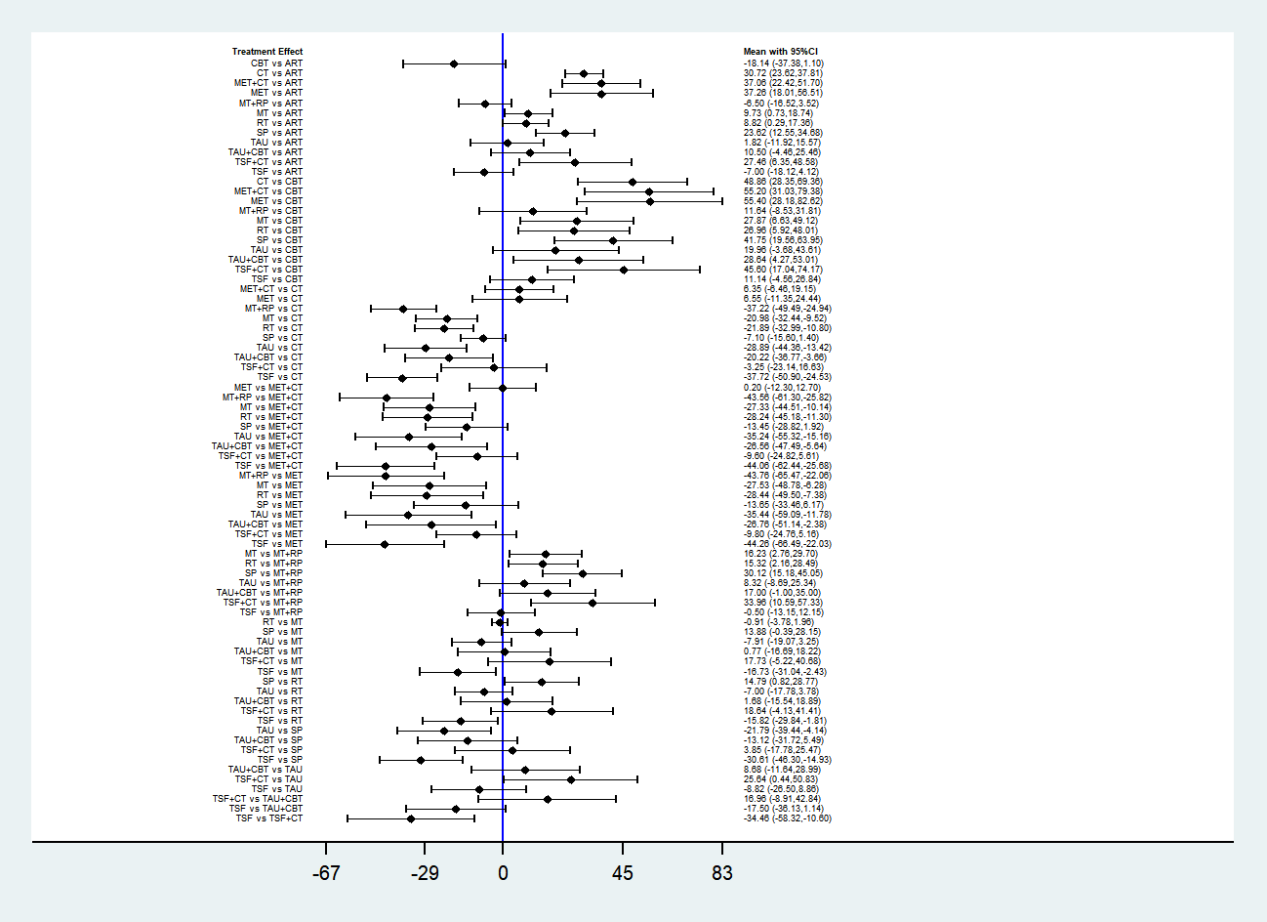


**Abbreviations:** TAU, treatment as usual; SP, supportive psychotherapy; CBT, cognitive behavioral therapy; MET, motivation enhancement therapy; TSF, twelve-step facilitation; RT, relaxation therapy; ART, affect regulation training; MT, marital therapy; CT, couple therapy; RP, relapse prevention.

**S9 Figure A(c)** Forest of pairwise comparison for PDA (reference of TAU).

**
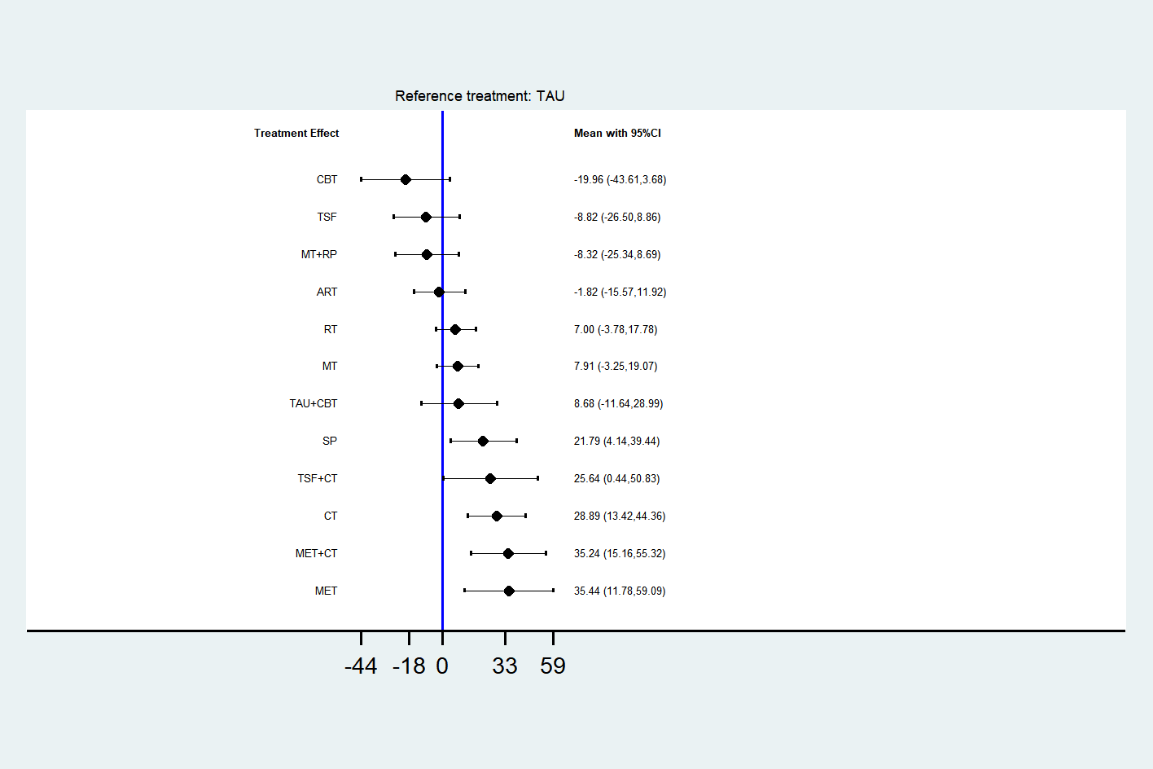
Note:** The therapies in this forest were compared with TAU as a reference. MET, MET+CT, CT, TSF+CT, and SP showed better effect than TAU.

**Abbreviations:** TAU, treatment as usual; SP, supportive psychotherapy; PLC, placebo; CBT, cognitive behavioral therapy; MET, motivation enhancement therapy; TSF, twelve-step facilitation; RT, relaxation therapy; ART, affect regulation training; MT, marital therapy; CT, couple therapy; RP, relapse prevention.

**S9 Figure B(a)** Summarized forest plot of direct comparison for change of DDD.

**
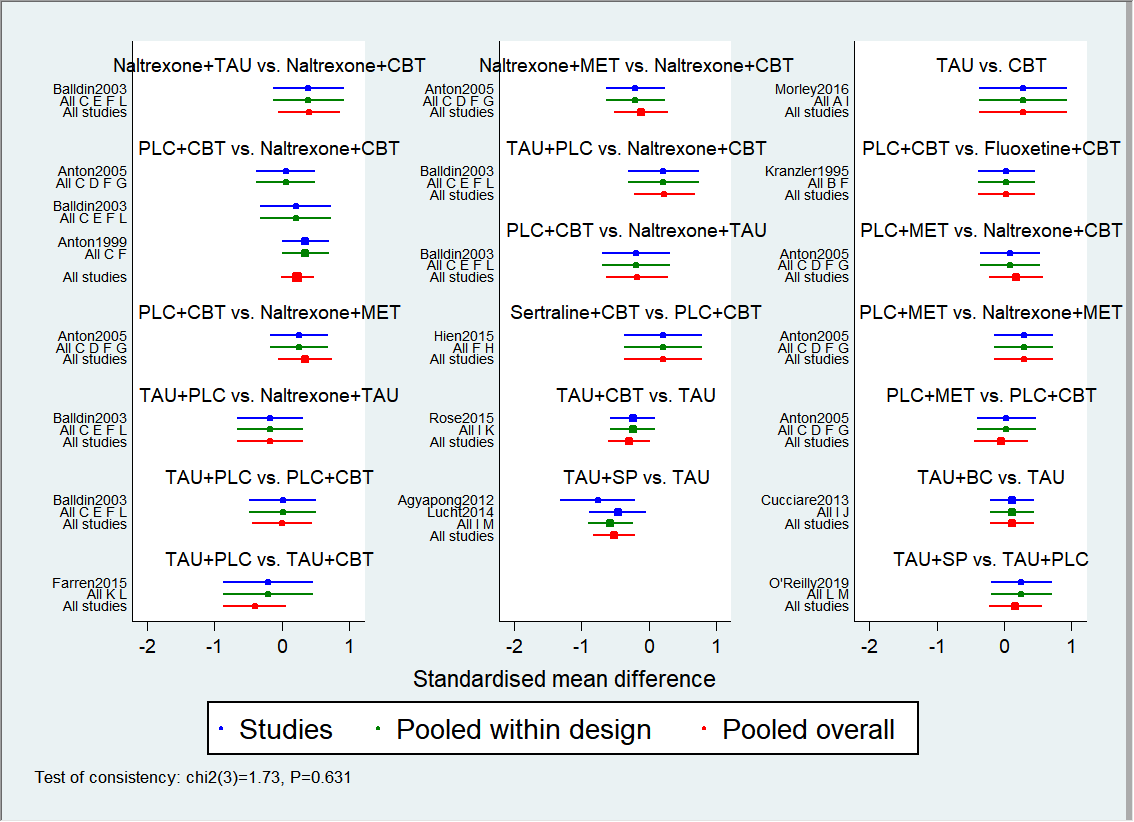
**

**Note:** Having fit both consistency and inconsistency models, a forest plot was produced. Blue represents the effect size (ES) and confidence interval (CI) of each trial, green represents the ES and CI of the same comparative study design, and red represents the ES and CI of the network meta-analysis. The combined results pooled within design are the results of the inconsistency models, and the combined results pooled overall are the results of the consistency models.

**Abbreviations:** TAU, treatment as usual; SP, supportive psychotherapy; PLC, placebo; CBT, cognitive behavioral therapy; MET, motivation enhancement therapy; BC, brief counseling.

The result of the inconsistency test was shown at the bottom(P=0.631＞0.05). Additionally, the similarity of the “Pooled within design” and “Pooled overall” results again supports the consistency model.

**S9 Figure B(b)** Forest of pairwise comparison for change of DDD (total).


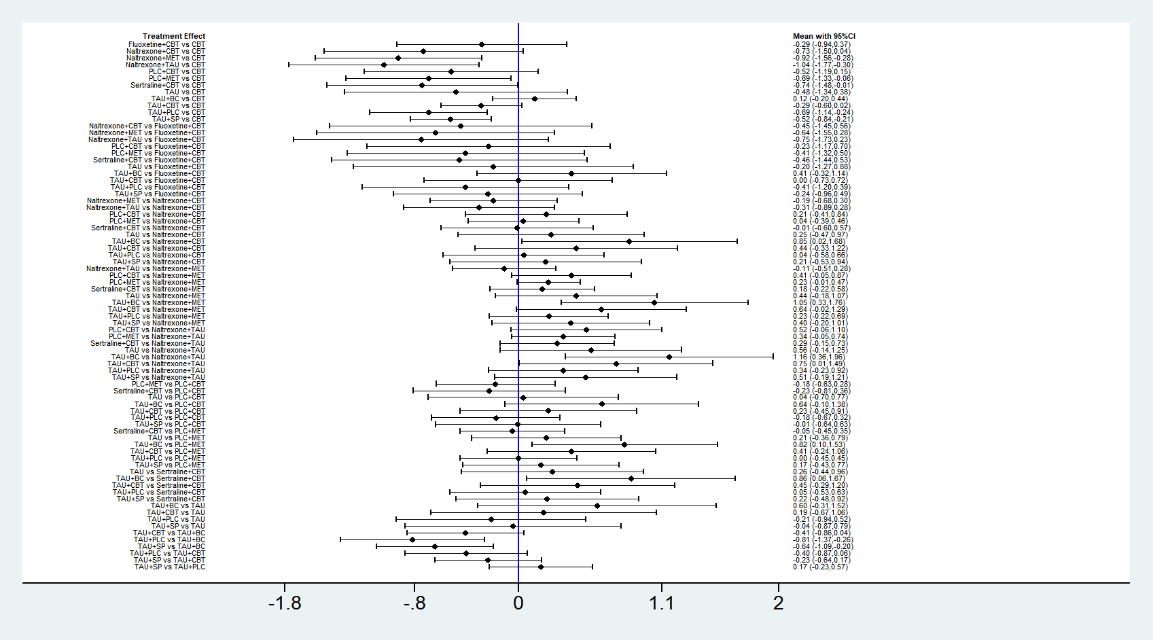


**Abbreviations:** TAU, treatment as usual; SP, supportive psychotherapy; PLC, placebo; CBT, cognitive behavioral therapy; MET, motivation enhancement therapy; BC, brief counseling.

**S9 Figure B(c)** Forest of pairwise comparison for change of DDD (reference of TAU+PLC).


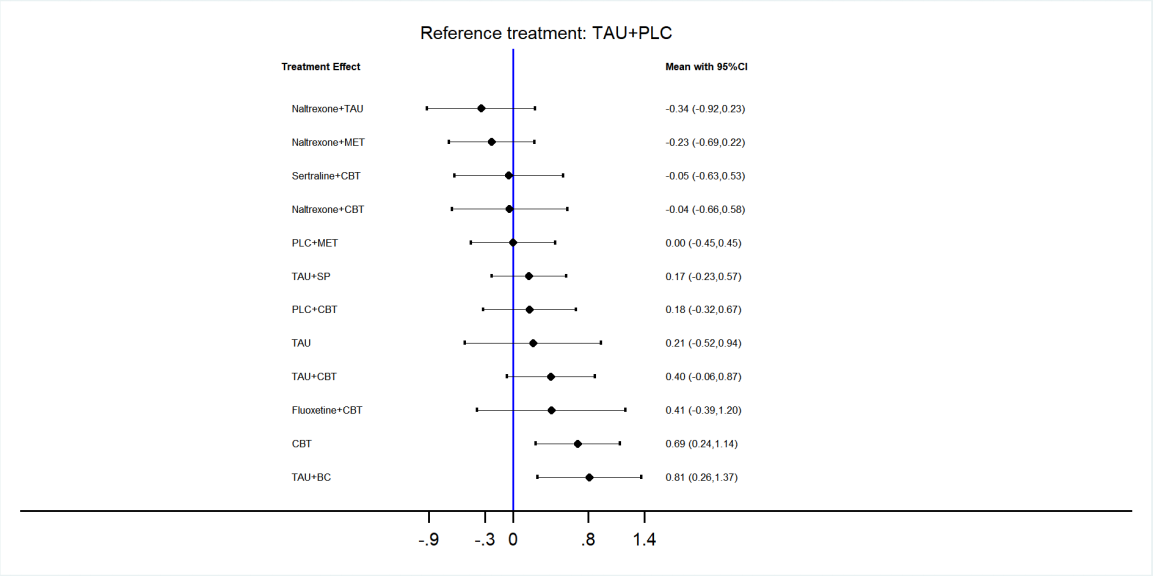


**Abbreviations:** TAU, treatment as usual; SP, supportive psychotherapy; PLC, placebo; CBT, cognitive behavioral therapy; MET, motivation enhancement therapy; BC, brief counseling.

**S9 Figure B(d)** Forest of pairwise comparison for DDD change (reference of TAU).


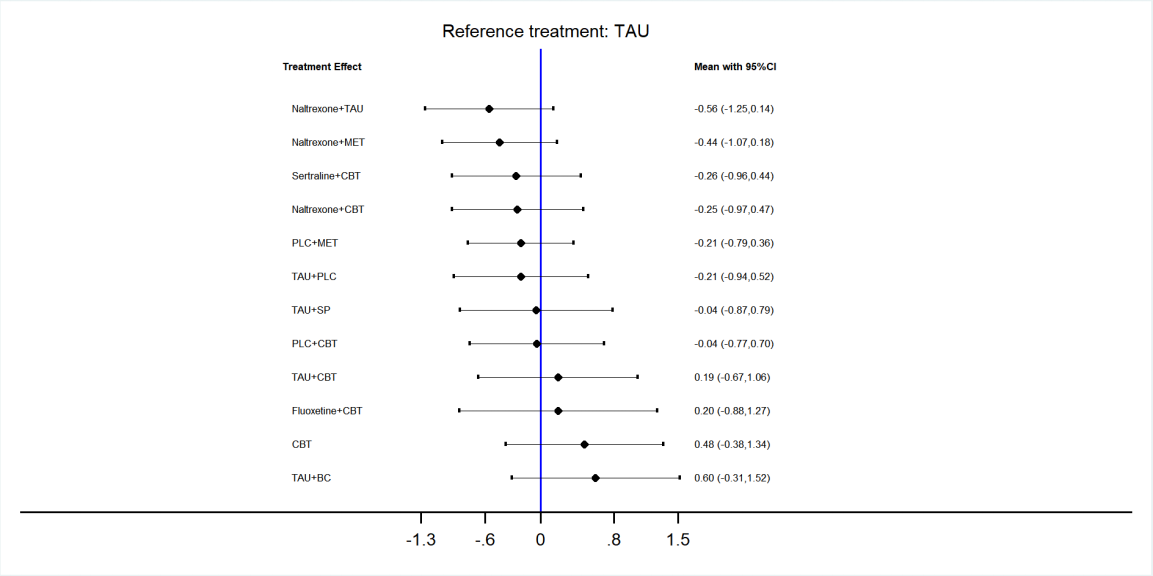


**Abbreviations:** TAU, treatment as usual; SP, supportive psychotherapy; PLC, placebo; CBT, cognitive behavioral therapy; MET, motivation enhancement therapy; BC, brief counseling.

**S9 Figure C(a)** Summarized forest plot of direct comparison for change of craving.


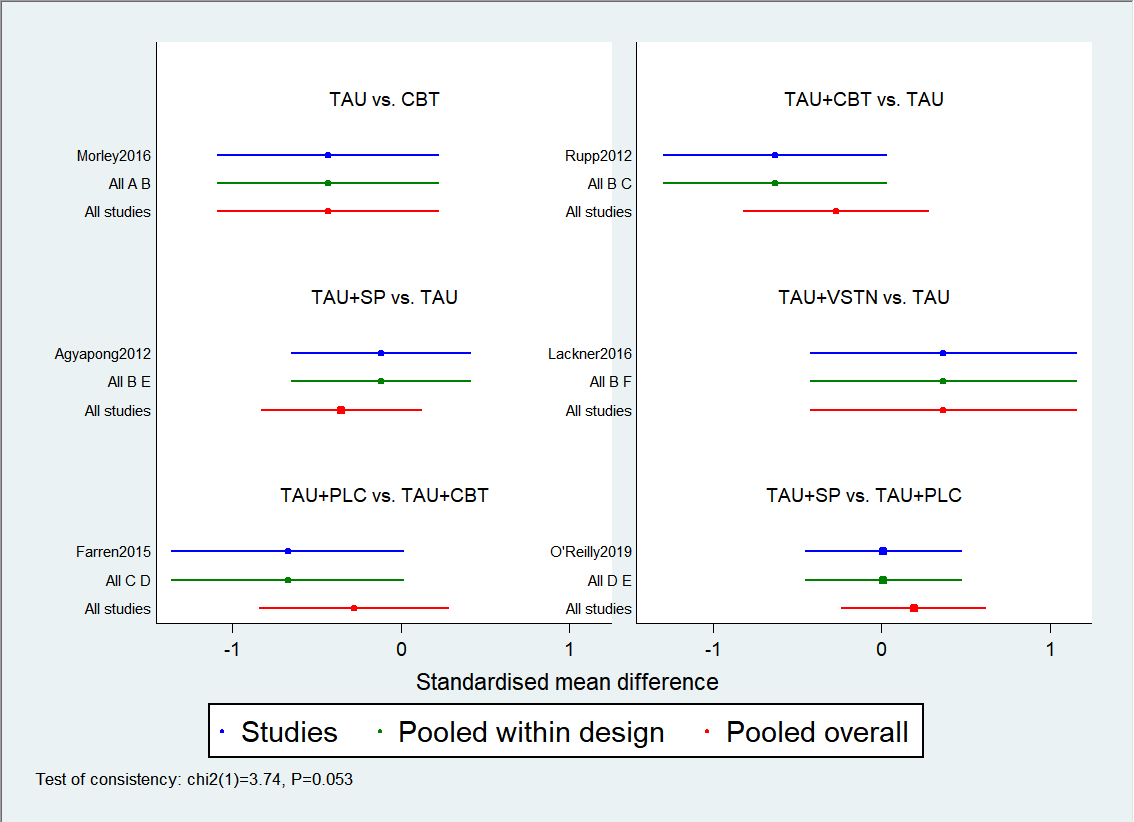


**Note:** Having fit both consistency and inconsistency models, a forest plot was produced. Blue represents the effect size (ES) and confidence interval (CI) of each trial, green represents the ES and CI of the same comparative study design, and red represents the ES and CI of the network meta-analysis. The combined results pooled within design are the results of the inconsistency models, and the combined results pooled overall are the results of the consistency models. The result of the inconsistency test was shown at the bottom(P=0.053＞0.05). Additionally, the dissimilarity of the “Pooled within design” and “Pooled overall” of TAU+SP vs TAU, TAU+PLC vs TAU+CBT, TAU+CBT vs TAU, and TAU vs TAU+PLC showed that they have same and wide 95% CI spans, but with the different interval positions among the effect of study and the corresponding pooled effect with the two models, all crossing the invalid line.

**Abbreviations:** TAU, treatment as usual; SP, supportive psychotherapy; PLC, placebo; CBT, cognitive behavioral therapy; VSTN, Visual Short-Time Neurofeedback.

**S9 Figure C(b)** Forest of pairwise comparison for change of craving (total).


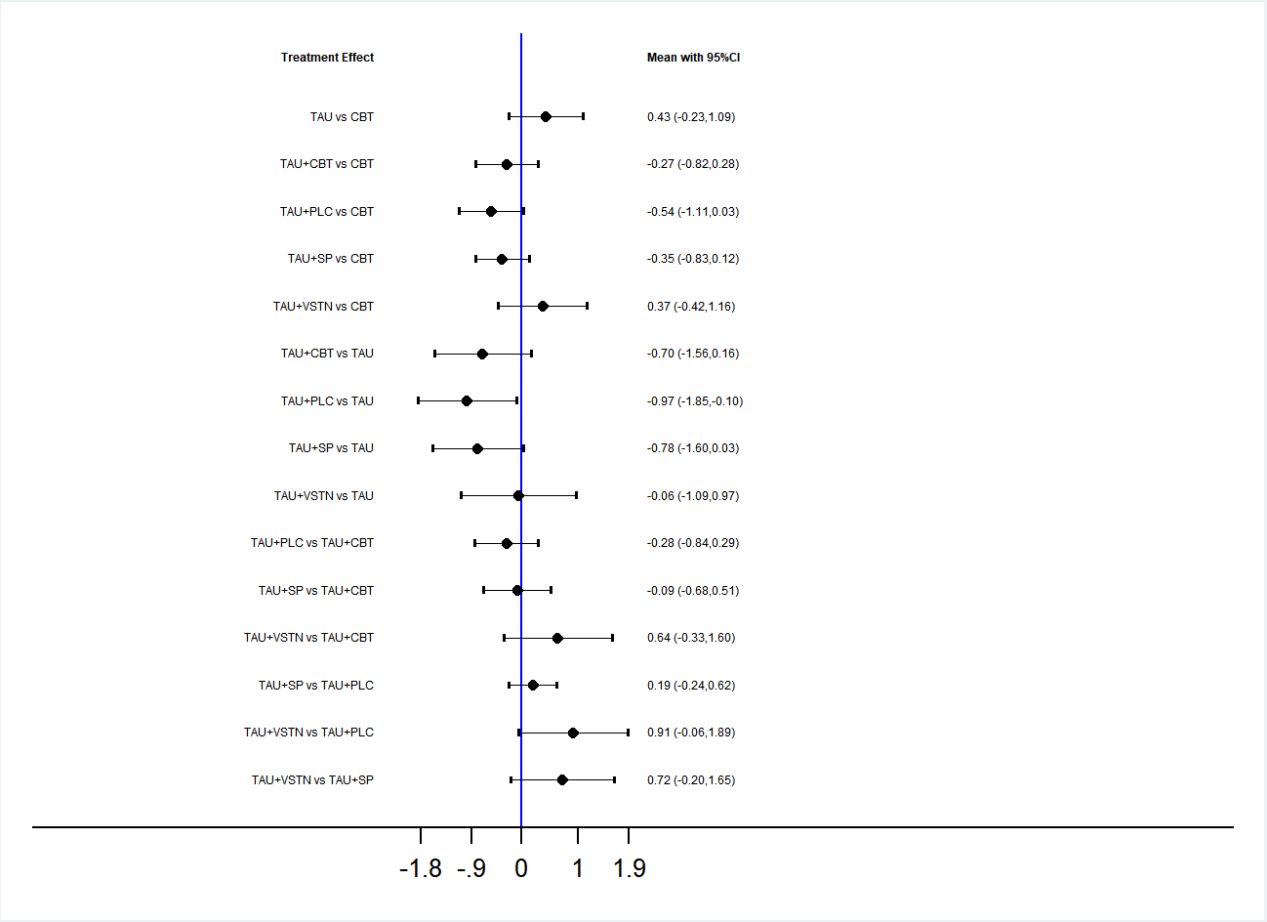


**Abbreviations:** TAU, treatment as usual; SP, supportive psychotherapy; PLC, placebo; CBT, cognitive behavioral therapy; VSTN, Visual Short-Time Neurofeedback.

**S9 Figure C(c)** Forest of pairwise comparison for change of craving (reference of TAU+PLC).


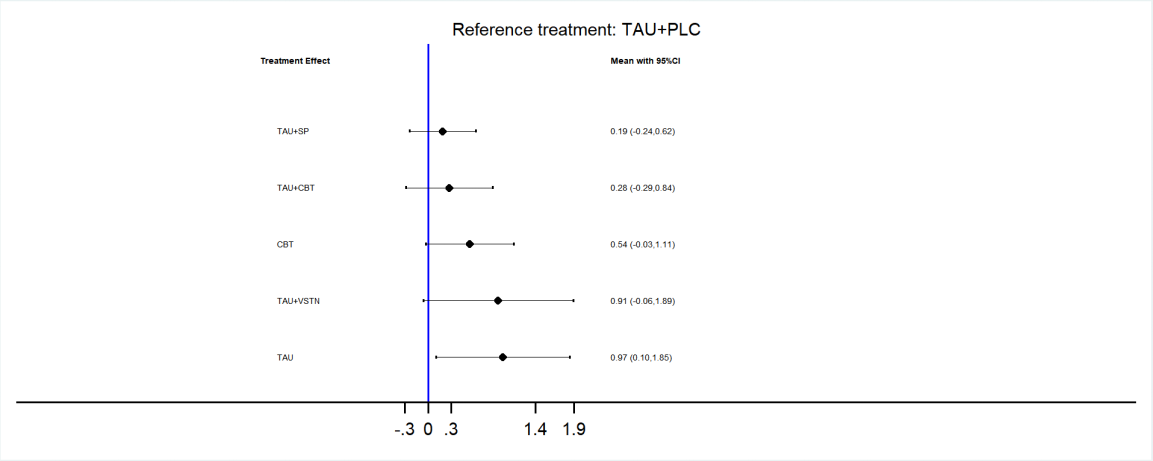


**Note:** The therapies in this forest were compared with TAU+PLC as a reference. No intervention showed a significantly better effect than TAU+PLC.

**Abbreviations:** TAU, treatment as usual; SP, supportive psychotherapy; PLC, placebo; CBT, cognitive behavioral therapy; VSTN, Visual Short-Time Neurofeedback.

**S9 Figure C(d)** Forest of pairwise comparison for change of craving (reference of TAU).


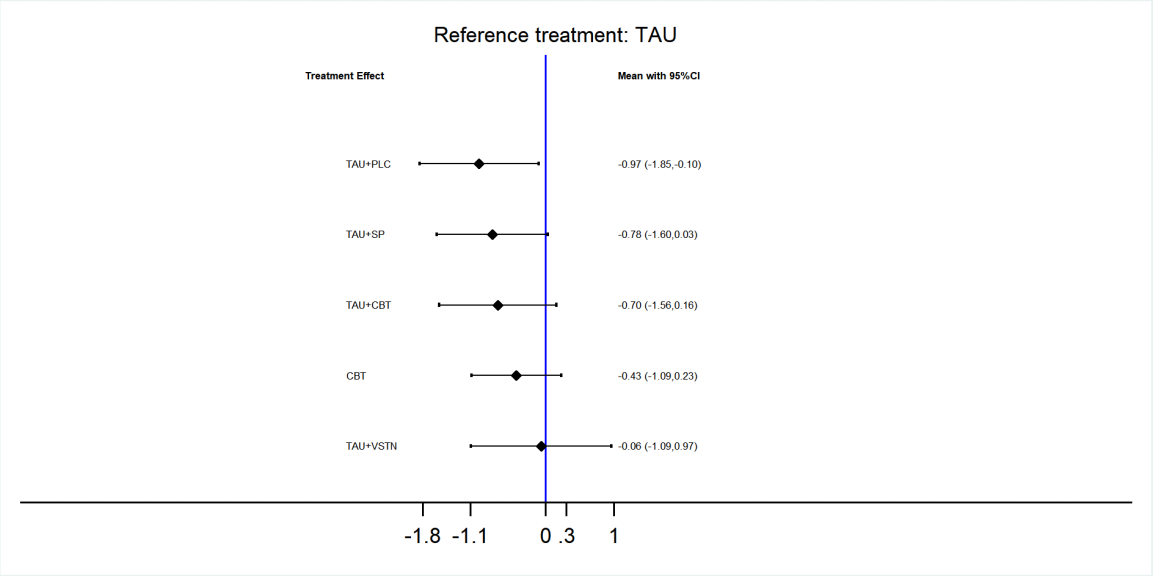


**Note:** The therapies in this forest were compared with TAU as a reference. Only TAU+PLC showed a better mean effect size than TAU.

**Abbreviations:** TAU, treatment as usual; SP, supportive psychotherapy; PLC, placebo; CBT, cognitive behavioral therapy; VSTN, Visual Short-Time Neurofeedback.

**S10. Network plot**

**S10 Figure** Network plot of available treatment comparisons for change of DDD (A) and change of craving (B).


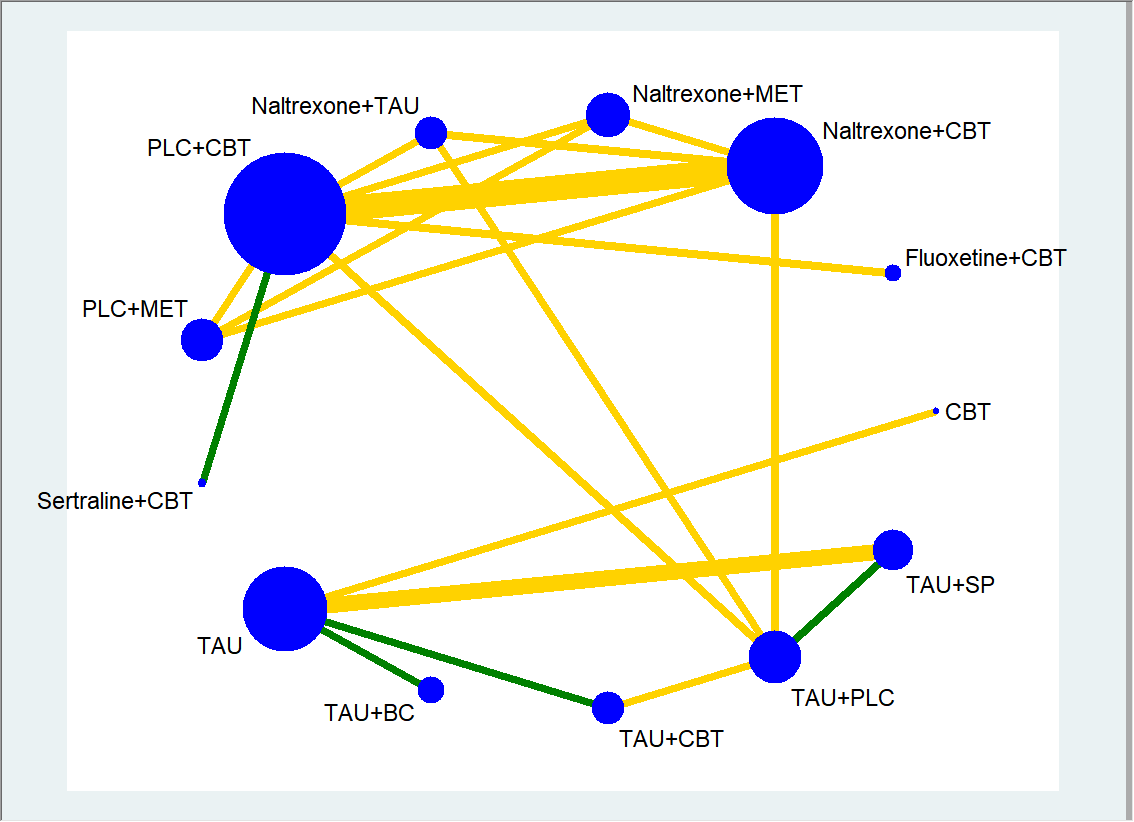

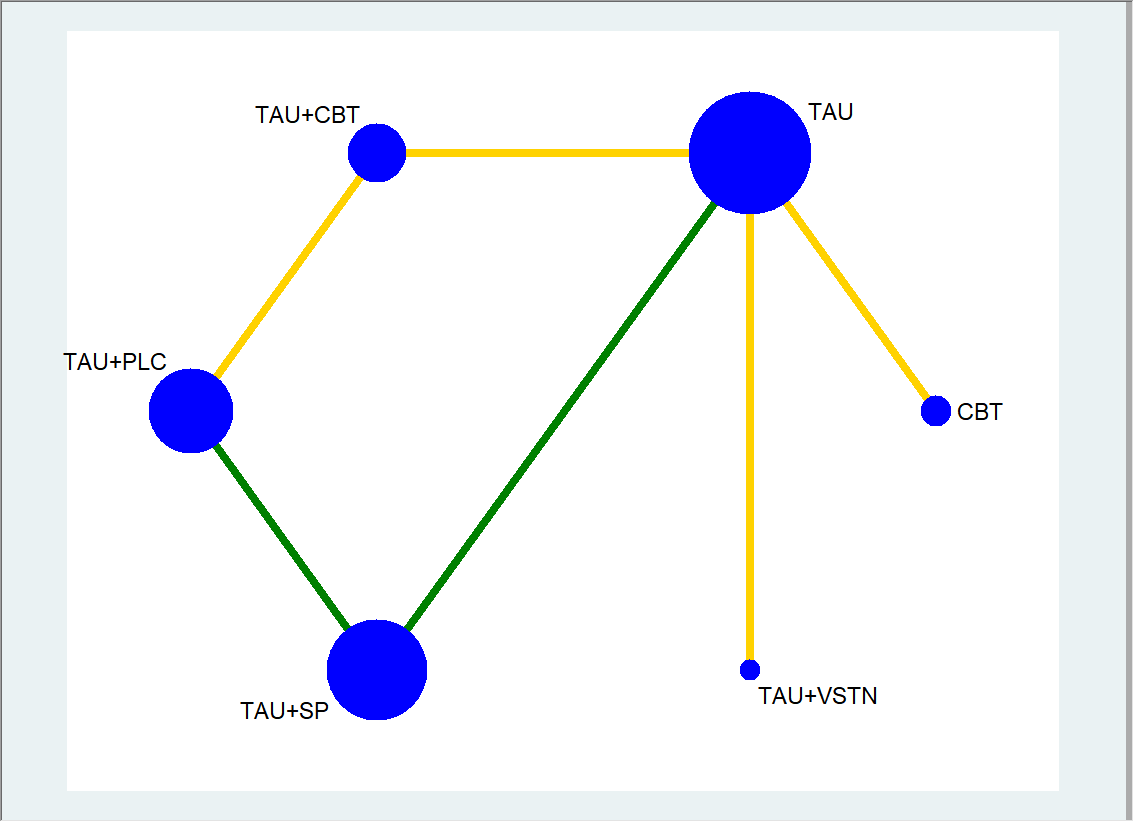


**A B**

**Note:** The node size is proportional to the number of participants randomised to each treatment, while the line width is proportional to the number of RCTs comparing each pair of treatments.

**Abbreviations:** TAU, treatment as usual; SP, supportive psychotherapy; PLC, placebo; CBT, cognitive behavioral therapy; MET, motivational enhancement therapy; BC, brief counseling; VSTN, Visual Short-Time Neurofeedback.

**S11. Network meta-analysis**

**S11 Figure A** Network meta-analysis of PDA (MD).

| MET+CT |  |  |  |  |  |  |  |  |  |  |  |  |
| --- | --- | --- | --- | --- | --- | --- | --- | --- | --- | --- | --- | --- |
| -0.20 (-12.70,12.30) | MET |  |  |  |  |  |  |  |  |  |  |  |
| 6.35 (-6.46,19.15) | 6.55 (-11.35,24.44) | CT |  |  |  |  |  |  |  |  |  |  |
| 9.60 (-5.61,24.82) | 9.80 (-5.16,24.76) | 3.25 (-16.63,23.14) | TSF+CT |  |  |  |  |  |  |  |  |  |
| 13.45 (-1.92,28.82) | 13.65 (-6.17,33.46) | 7.10 (-1.40,15.60) | 3.85 (-17.78,25.47) | SP |  |  |  |  |  |  |  |  |
| 27.33 (10.14,44.51) | 27.53 (6.28,48.78) | 20.98 (9.52,32.44) | 17.73 (-5.22,40.68) | 13.88 (-0.39,28.15) | MT |  |  |  |  |  |  |  |
| 28.24 (11.30,45.18) | 28.44 (7.38,49.50) | 21.89 (10.80,32.99) | 18.64 (-4.13,41.41) | 14.79 (0.82,28.77) | 0.91 (-1.96,3.78) | RT |  |  |  |  |  |  |
| 26.56 (5.64,47.49) | 26.76 (2.38,51.14) | 20.22 (3.66,36.77) | 16.96 (-8.91,42.84) | 13.12 (-5.49,31.72) | -0.77 (-18.22,16.69) | -1.68 (-18.89,15.54) | TAU+CBT |  |  |  |  |  |
| 35.24 (15.16,55.32) | 35.44 (11.78,59.09) | 28.89 (13.42,44.36) | 25.64 (0.44,50.83) | 21.79 (4.14,39.44) | 7.91 (-3.25,19.07) | 7.00 (-3.78,17.78) | 8.68 (-11.64,28.99) | TAU |  |  |  |  |
| 37.06 (22.42,51.70) | 37.26 (18.01,56.51) | 30.72 (23.62,37.81) | 27.46 (6.35,48.58) | 23.62 (12.55,34.68) | 9.73 (0.73,18.74) | 8.82 (0.29,17.36) | 10.50 (-4.46,25.46) | 1.82 (-11.92,15.57) | ART |  |  |  |
| 43.56 (25.82,61.30) | 43.76 (22.06,65.47) | 37.22 (24.94,49.49) | 33.96 (10.59,57.33) | 30.12 (15.18,45.05) | 16.23 (2.76,29.70) | 15.32 (2.16,28.49) | 17.00 (-1.00,35.00) | 8.32 (-8.69,25.34) | 6.50 (-3.52,16.52) | MT+RP |  |  |
| 44.06 (25.68,62.44) | 44.26 (22.03,66.49) | 37.72 (24.53,50.90) | 34.46 (10.60,58.32) | 30.61 (14.93,46.30) | 16.73 (2.43,31.04) | 15.82 (1.81,29.84) | 17.50 (-1.14,36.13) | 8.82 (-8.86,26.50) | 7.00 (-4.12,18.12) | 0.50 (-12.15,13.15) | TSF |  |
| 55.20 (31.03,79.38) | 55.40 (28.18,82.62) | 48.86 (28.35,69.36) | 45.60 (17.04,74.17) | 41.75 (19.56,63.95) | 27.87 (6.63,49.12) | 26.96 (5.92,48.01) | 28.64 (4.27,53.01) | 19.96 (-3.68,43.61) | 18.14 (-1.10,37.38) | 11.64 (-8.53,31.81) | 11.14 (-4.56,26.84) | CBT |

**Note:** Effect sizes are represented by summary MDs and 95% CIs. For the lower triangle, negative values favor the treatments in the corresponding row, while positive values favor the treatments in the corresponding column.

**Abbreviations:** TAU, treatment as usual; SP, supportive psychotherapy; CBT, cognitive behavioral therapy; MET, motivation enhancement therapy; TSF, twelve-step facilitation; RT, relaxation therapy; ART, affect regulation training; MT, marital therapy; CT, couple therapy; RP, relapse prevention.

**S11 Figure B** Network meta-analysis of change of DDD.

| Naltrexone+TAU |  |  |  |  |  |  |  |  |  |  |  |  |
| --- | --- | --- | --- | --- | --- | --- | --- | --- | --- | --- | --- | --- |
| -0.11 (-0.51,0.28) | Naltrexone+MET |  |  |  |  |  |  |  |  |  |  |  |
| -0.29 (-0.73,0.15) | -0.18 (-0.58,0.22) | Sertraline+CBT |  |  |  |  |  |  |  |  |  |  |
| -0.31 (-0.89,0.28) | -0.19 (-0.68,0.30) | -0.01 (-0.60,0.57) | Naltrexone+CBT |  |  |  |  |  |  |  |  |  |
| -0.34 (-0.92,0.23) | -0.23 (-0.69,0.22) | -0.05 (-0.63,0.53) | -0.04 (-0.66,0.58) | TAU+PLC |  |  |  |  |  |  |  |  |
| -0.34 (-0.74,0.05) | -0.23 (-0.47,0.01) | -0.05 (-0.45,0.35) | -0.04 (-0.46,0.39) | 0.00 (-0.45,0.45) | PLC+MET |  |  |  |  |  |  |  |
| -0.51 (-1.21,0.19) | -0.40 (-1.01,0.20) | -0.22 (-0.92,0.48) | -0.21 (-0.94,0.53) | -0.17 (-0.57,0.23) | -0.17 (-0.77,0.43) | TAU+SP |  |  |  |  |  |  |
| -0.52 (-1.10,0.06) | -0.41 (-0.87,0.05) | -0.23 (-0.81,0.36) | -0.21 (-0.84,0.41) | -0.18 (-0.67,0.32) | -0.18 (-0.63,0.28) | -0.01 (-0.64,0.63) | PLC+CBT |  |  |  |  |  |
| -0.56 (-1.25,0.14) | -0.44 (-1.07,0.18) | -0.26 (-0.96,0.44) | -0.25 (-0.97,0.47) | -0.21 (-0.94,0.52) | -0.21 (-0.79,0.36) | -0.04 (-0.87,0.79) | -0.04 (-0.77,0.70) | TAU |  |  |  |  |
| -0.75 (-1.73,0.23) | -0.64 (-1.55,0.28) | -0.46 (-1.44,0.53) | -0.45 (-1.45,0.56) | -0.41 (-1.20,0.39) | -0.41 (-1.32,0.50) | -0.24 (-0.96,0.49) | -0.23 (-1.17,0.70) | -0.20 (-1.27,0.88) | Fluoxetine+CBT |  |  |  |
| -0.75 (-1.49,-0.01) | -0.64 (-1.29,0.02) | -0.45 (-1.20,0.29) | -0.44 (-1.22,0.33) | -0.40 (-0.87,0.06) | -0.41 (-1.06,0.24) | -0.23 (-0.64,0.17) | -0.23 (-0.91,0.45) | -0.19 (-1.06,0.67) | 0.00 (-0.72,0.73) | TAU+CBT |  |  |
| -1.04 (-1.77,-0.30) | -0.92 (-1.56,-0.28) | -0.74 (-1.48,-0.01) | -0.73 (-1.50,0.04) | -0.69 (-1.14,-0.24) | -0.69 (-1.33,-0.06) | -0.52 (-0.84,-0.21) | -0.52 (-1.19,0.15) | -0.48 (-1.34,0.38) | -0.29 (-0.94,0.37) | -0.29 (-0.60,0.02) | CBT |  |
| -1.16 (-1.96,-0.36) | -1.05 (-1.76,-0.33) | -0.86 (-1.67,-0.06) | -0.85 (-1.68,-0.02) | -0.81 (-1.37,-0.26) | -0.82 (-1.53,-0.10) | -0.64 (-1.09,-0.20) | -0.64 (-1.38,0.10) | -0.60 (-1.52,0.31) | -0.41 (-1.14,0.32) | -0.41 (-0.86,0.04) | -0.12 (-0.44,0.20) | TAU+BC |

**Note:** Effect sizes are represented by summary MDs and 95% CIs. For the lower triangle, negative values favor the treatments in the corresponding column, while positive values favor the treatments in the corresponding row.

**Abbreviations:** TAU, treatment as usual; SP, supportive psychotherapy; PLC, placebo; CBT, cognitive behavioral therapy; MET, motivation enhancement therapy; BC, brief counseling.

**S11 Figure C** Network meta-analysis of change of craving.

| TAU+PLC |  |  |  |  |  |
| --- | --- | --- | --- | --- | --- |
| -0.19 (-0.62,0.24) | TAU+SP |  |  |  |  |
| -0.28 (-0.84,0.29) | -0.09 (-0.68,0.51) | TAU+CBT |  |  |  |
| -0.54 (-1.11,0.03) | -0.35 (-0.83,0.12) | -0.27 (-0.82,0.28) | CBT |  |  |
| -0.91 (-1.89,0.06) | -0.72 (-1.65,0.20) | -0.64 (-1.60,0.33) | -0.37 (-1.16,0.42) | TAU+VSTN |  |
| **-0.97 (-1.85,-0.10)** | -0.78 (-1.60,0.03) | -0.70 (-1.56,0.16) | -0.43 (-1.09,0.23) | -0.06 (-1.09,0.97) | TAU |

**Note:** Effect sizes are represented by summary MDs and 95% CIs. For the lower triangle, negative values favor the treatments in the corresponding column, while positive values favor the treatments in the corresponding row.

**Abbreviations:** TAU, treatment as usual; SP, supportive psychotherapy; PLC, placebo; CBT, cognitive behavioral therapy; VSTN, Visual Short-Time Neurofeedback.

**S12. Results of GRADE Rating**73-82

**S12 Table A** Estimates of effect and quality ratings for comparison of psychotherapies for change of DDD

(a) Significant network effect of psychotherapy vs TAU, PLC, TAU+PLC, or only medication control

| **Change of DDD** | | | | | | | |
| --- | --- | --- | --- | --- | --- | --- | --- |
| **Comparison** | | **Direct evidence** | | **Indirect evidence** | | **Network meta-ananlysis** | |
| **SMD**  **(95% CI)** | **Quality of**  **evidence** | **SMD**  **(95% CI)** | **Quality of**  **evidence** | **SMD**  **(95% CI)** | **Quality of**  **evidence** |
| Significant network effect with **high and moderate** certainty (psychotherapy vs TAU, PLC, TAU+PLC, or only medication control) | | | | | | | |
| TAU+CBT | vs Naltrexone+TAU | — | — | 0.75  (0.01,1.49) | Moderate^ | 0.75  (0.01,1.49) | Moderate |
| Significant network effect with **low and very low** certainty (psychotherapy vs TAU, PLC, TAU+PLC, or only medication control) | | | | | | | |
| CBT | vs TAU+PLC | — | — | 0.69  (0.24,1.14) | Low∮ | 0.69  (0.24,1.14) | Low |
| TAU+BC | vs Naltrexone+TAU | — | — | 1.16  (0.36,1.96) | Low∮ | 1.16  (0.36,1.96) | Low |

**Note:** # Imprecise; * Severe imprecise; ∫ Precise; ^ Direct evidence with medium quality; ∮ Direct evidence with low or very low quality; ⊥ Limitations of research design; ↑ Not estimable because the treatment was not included in the evidence network.

**Abbreviations:** TAU, treatment as usual; PLC, placebo; CBT, cognitive behavioral therapy; BC, brief counseling.

(b) Significant network effect of psychotherapy vs another psychotherapy

| **Change of DDD** | | | | | | | |
| --- | --- | --- | --- | --- | --- | --- | --- |
| **Comparison** | | **Direct evidence** | | **Indirect evidence** | | **Network meta-ananlysis** | |
| **SMD**  **(95% CI)** | **Quality of**  **evidence** | **SMD**  **(95% CI)** | **Quality of**  **evidence** | **SMD**  **(95% CI)** | **Quality of**  **evidence** |
| Sihnificant network effect with **high and moderate** certainty (psychotherapy vs another psychotherapy) | | | | | | | |
| — | — | — | — | — | — | — | — |
| Significant network effect with **low and very low** certainty (psychotherapy vs another psychotherapy) | | | | | | | |
| Naltrexone+CBT | vs TAU+BC | — | — | -0.85  (-1.68,-0.02) | Low∮ | -0.85  (-1.68,-0.02) | Low |
| Naltrexone+MET | vs TAU+BC | — | — | -1.05  (-1.76,-0.33) | Low∮ | -1.05  (-1.76,-0.33) | Low |
| PLC+MET | vs TAU+BC | — | — | -0.82  (-1.53,-0.10) | Low∮ | -0.82  (-1.53,-0.10) | Low |
| Sertraline+CBT | vs TAU+BC | — | — | -0.86  (-1.67,-0.06) | Low∮ | -0.86  (-1.67,-0.06) | Low |
| TAU+SP | vs TAU+BC | — | — | -0.64  (-1.09,-0.20) | Low∮ | -0.64  (-1.09,-0.20) | Low |
| TAU+SP | vs CBT | — | — | -0.52  (-0.84,-0.21) | Low∮ | -0.52  (-0.84,-0.21) | Low |
| PLC+MET | vs CBT | — | — | -0.69  (-1.33,-0.06) | Low∮ | -0.69  (-1.33,-0.06) | Low |
| Sertraline+CBT | vs CBT | — | — | -0.74  (-1.48,-0.01) | Low∮ | -0.74  (-1.48,-0.01) | Low |
| Naltrexone+MET | vs CBT | — | — | -0.92  (-1.56,-0.28) | Low∮ | -0.92  (-1.56,-0.28) | Low |

**Note:** # Imprecise; * Severe imprecise; ∫ Precise; ^ Direct evidence with medium quality; ∮ Direct evidence with low or very low quality; ⊥ Limitations of research design; ↑ Not estimable because the treatment was not included in the evidence network.

**Abbreviations:** TAU, treatment as usual; SP, supportive psychotherapy; PLC, placebo; CBT, cognitive behavioral therapy; MET, motivation enhancement therapy; BC, brief counseling.

(c) Insignificant network effect of psychotherapy vs TAU, PLC, TAU+PLC, or only medication control

| **Change of DDD** | | | | | | | |
| --- | --- | --- | --- | --- | --- | --- | --- |
| **Comparison** | | **Direct evidence** | | **Indirect evidence** | | **Network meta-ananlysis** | |
| **SMD**  **(95% CI)** | **Quality of**  **evidence** | **SMD**  **(95% CI)** | **Quality of**  **evidence** | **SMD**  **(95% CI)** | **Quality of**  **evidence** |
| Insignificant network effect with **high and moderate** certainty (psychotherapy vs TAU or TAU+PLC or medication control) | | | | | | | |
| TAU+SP | vs TAU | -0.57  (-0.91,-0.24) | High⊥# | -0.19  (-1.07, 0.69) | Low∮ | -0.04  (-0.87,0.79) | High |
| PLC+CBT | vs TAU+PLC | -0.01  (-0.51,0.48) | High# | 0.06  (-1.02,1.14) | Low∮ | 0.18  (-0.32,0.67) | High |
| Naltrexone+CBT | vs TAU+PLC | -0.20  (-0.72,0.33) | High# | -0.28  (-1.32,0.75)* | Low∮ | -0.04  (-0.66,0.58) | High |
| Naltrexone+TAU | vs TAU+PLC | 0.19  (-0.31,0.68) | High# | 1.64  (-53.82,57.10)* | High | -0.34  (-0.92,0.23) | High |
| PLC+CBT | vs Naltrexone+TAU | -0.21  (-0.71,0.30) | High# | -0.12  (-1.20,0.96)* | High | 0.52  (-0.06,1.10) | High |
| Naltrexone+CBT | vs Naltrexone+TAU | -0.36  (-0.89,0.17) | High# | -0.46  (-1.50,0.58)* | Low∮ | 0.31  (-0.28,0.89) | Moderate |
| Sertraline+CBT | vs Naltrexone+TAU | — | — | 0.29  (-0.15,0.73) | Moderate^ | 0.29  (-0.15,0.73) | Moderate |
| TAU+CBT | vs TAU+PLC | 0.21  (-0.46,0.88) | Moderate^* | 0.59  (-0.07,1.25) | Low∮ | 0.40  (-0.06,0.87) | Moderate |
| Sertraline+CBT | vs TAU+PLC | — | — | -0.05  (-0.63,0.53) | Moderate^ | -0.05  (-0.63,0.53) | Moderate |
| Insignificant network effect with **low and very low** certainty (psychotherapy vs TAU or TAU+PLC or medication control) | | | | | | | |
| TAU+BC | vs TAU | 0.12  (-0.20,0.44) | Low∮* | — | No estimable↑ | 0.60  (-0.31,1.52) | Low |
| TAU+CBT | vs TAU | -0.24  (-0.57,0.09) | Low∮⊥* | -0.62  (-1.50,0.26) | Low∮ | 0.19  (-0.67,1.06) | Low |
| PLC+CBT | vs TAU | — | — | -0.04  (-0.77,0.70) | Low∮ | -0.04  (-0.77,0.70) | Low |
| TAU+PLC | vs TAU | — | — | -0.21  (-0.94,0.52) | Low∮ | -0.21  (-0.94,0.52) | Low |
| PLC+MET | vs TAU | — | — | -0.21  (-0.79,0.36) | Low∮ | -0.21  (-0.79,0.36) | Low |
| Naltrexone+CBT | vs TAU | — | — | -0.25  (-0.97,0.47) | Low∮ | -0.25  (-0.97,0.47) | Low |
| Sertraline+CBT | vs TAU | — | — | -0.26  (-0.96,0.44) | Low∮ | -0.26  (-0.96,0.44) | Low |
| Naltrexone+MET | vs TAU | — | — | -0.44  (-1.07,0.18) | Low∮ | -0.44  (-1.07,0.18) | Low |
| CBT | vs TAU | -0.29  (-0.94,0.37) | Low∮⊥* | — | No estimable↑ | 0.48  (-0.38,1.34) | Low |
| Naltrexone+TAU | vs TAU | — | — | -0.56  (-1.25,0.14) | Low∮ | -0.56  (-1.25,0.14) | Low |
| PLC+MET | vs TAU+PLC | — | — | 0.00  (-0.45,0.45) | Low∮ | 0.00  (-0.45,0.45) | Low |
| Naltrexone+MET | vs TAU+PLC | — | — | -0.23  (-0.69,0.22) | Low∮ | -0.23  (-0.69,0.22) | Low |
| TAU+BC | vs TAU+PLC | — | — | 0.81  (0.26,1.37) | Low∮ | 0.81  (0.26,1.37) | Low |
| TAU+SP | vs TAU+PLC | 0.26  (-0.19,0.72) | Low∮⊥# | -0.12  (-0.95,0.70) | Low∮ | 0.17  (-0.23,0.57) | Low |
| PLC+MET | vs Naltrexone+TAU | — | — | 0.34  (-0.05,0.74) | Low∮ | 0.34  (-0.05,0.74) | Low |
| Naltrexone+MET | vs Naltrexone+TAU | — | — | 0.11  (-0.28,0.51) | Low∮ | 0.11  (-0.28,0.51) | Low |
| TAU+SP | vs Naltrexone+TAU | — | — | 0.51  (-0.19,1.21) | Low∮ | 0.51  (-0.19,1.21) | Low |
| Fluoxetine+CBT | vs Naltrexone+TAU | — | — | 0.75  (-0.23,1.73) | Very Low∮ | 0.75  (-0.23,1.73) | Very low |
| CBT | vs Naltrexone+TAU | — | — | 1.04  (0.30,1.77) | Low∮ | 1.04  (0.30,1.77) | Very low |
| Fluoxetine+CBT | vs TAU | — | — | 0.20  (-0.88,1.27) | Very Low∮ | 0.20  (-0.88,1.27) | Very low |
| Fluoxetine+CBT | vs TAU+PLC | — | — | 0.41  (-0.39,1.20) | Very Low∮ | 0.41  (-0.39,1.20) | Very low |

**Note:** # Imprecise; * Severe imprecise; ∫ Precise; ^ Direct evidence with medium quality; ∮ Direct evidence with low or very low quality; ⊥ Limitations of research design; ↑ Not estimable because the treatment was not included in the evidence network.

**Abbreviations:** TAU, treatment as usual; SP, supportive psychotherapy; PLC, placebo; CBT, cognitive behavioral therapy; MET, motivation enhancement therapy; BC, brief counseling.

(d) Insignificant network effect of psychotherapy vs another psychotherapy

| **Change of DDD** | | | | | | | |
| --- | --- | --- | --- | --- | --- | --- | --- |
| **Comparison** | | **Direct evidence** | | **Indirect evidence** | | **Network meta-ananlysis** | |
| **SMD**  **(95% CI)** | **Quality of**  **evidence** | **SMD**  **(95% CI)** | **Quality of**  **evidence** | **SMD**  **(95% CI)** | **Quality of**  **evidence** |
| Insignificant network effect with **high and moderate** certainty (psychotherapy vs another psychotherapy) | | | | | | | |
| Naltrexone+CBT | vs PLC+CBT | -0.23  (-0.47,0.01) | Low∮⊥# | -1.54  (-89.13,86.06)* | High | -0.21  (-0.84,0.41) | High |
| PLC+CBT | vs TAU+CBT | — | — | -0.23  (-0.91,0.45) | Moderate^ | -0.23  (-0.91,0.45) | Moderate |
| Naltrexone+CBT | vs TAU+CBT | — | — | -0.44  (-1.22,0.33) | Moderate^ | -0.44  (-1.22,0.33) | Moderate |
| Sertraline+CBT | vs TAU+CBT | — | — | -0.45  (-1.20,0.29) | Moderate^ | -0.45  (-1.20,0.29) | Moderate |
| Sertraline+CBT | vs PLC+CBT | 0.21  (-0.36,0.79) | Moderate^* | — | No estimable↑ | -0.23  (-0.81,0.36) | Moderate |
| Insignificant network effect with **low and very low** certainty (psychotherapy vs another psychotherapy) | | | | | | | |
| CBT | vs TAU+BC | — | — | -0.12  (-0.44,0.20) | Low∮ | -0.12  (-0.44,0.20) | Low |
| TAU+CBT | vs TAU+BC | — | — | -0.41  (-0.86,0.04) | Low∮ | -0.41  (-0.86,0.04) | Low |
| PLC+CBT | vs TAU+BC | — | — | -0.64  (-1.38,0.10) | Low∮ | -0.64  (-1.38,0.10) | Low |
| TAU+SP | vs TAU+CBT | — | — | -0.23  (-0.64,0.17) | Low∮ | -0.23  (-0.64,0.17) | Low |
| CBT | vs TAU+CBT | — | — | -0.29  (-0.60,0.02) | Low∮ | 0.29  (-0.02,0.60) | Low |
| PLC+MET | vs TAU+CBT | — | — | -0.41  (-1.06,0.24) | Low∮ | -0.41  (-1.06,0.24) | Low |
| Naltrexone+MET | vs TAU+CBT | — | — | -0.64  (-1.29,0.02) | Low∮ | -0.64  (-1.29,0.02) | Low |
| PLC+CBT | vs TAU+SP | — | — | 0.01  (-0.63,0.64) | Low∮ | 0.01  (-0.63,0.64) | Low |
| PLC+MET | vs TAU+SP | — | — | -0.17  (-0.77,0.43) | Low∮ | -0.17  (-0.77,0.43) | Low |
| Naltrexone+CBT | vs TAU+SP | — | — | -0.21  (-0.94,0.53) | Low∮ | -0.21  (-0.94,0.53) | Low |
| Sertraline+CBT | vs TAU+SP | — | — | -0.22  (-0.92,0.48) | Low∮ | -0.22  (-0.92,0.48) | Low |
| Naltrexone+MET | vs TAU+SP | — | — | -0.40  (-1.01,0.20) | Low∮ | -0.40  (-1.01,0.20) | Low |
| PLC+MET | vs PLC+CBT | 0.04  (-0.40,0.47) | Low∮⊥* | -0.05  (-1.43,0.49)* | Low∮ | -0.18  (-0.63,0.28) | Low |
| Naltrexone+MET | vs PLC+CBT | -0.24  (-0.68,0.19) | Low∮⊥* | -0.76  (-1.72,0.20)* | Low∮ | -0.41  (-0.87,0.05) | Low |
| CBT | vs PLC+CBT | — | — | -0.52  (-1.19,0.15) | Low∮ | -0.52  (-1.19,0.15) | Low |
| Naltrexone+CBT | vs PLC+MET | -0.10  (-0.54,0.35) | Low∮⊥* | -0.60  (-1.55,0.36)* | Low∮ | -0.04  (-0.46,0.39) | Low |
| Sertraline+CBT | vs PLC+MET | — | — | -0.05  (-0.45,0.35) | Low∮ | -0.05  (-0.45,0.35) | Low |
| Naltrexone+MET | vs PLC+MET | -0.26  (-0.70,0.18) | Low∮⊥* | — | No estimable↑ | -0.23  (-0.47,0.01) | Low |
| Naltrexone+CBT | vs CBT | — | — | -0.73  (-1.50,0.04) | Low∮ | -0.73  (-1.50,0.04) | Low |
| Naltrexone+CBT | vs Naltrexone+MET | 0.20  (-0.24,0.64) | Low∮⊥* | -0.30  ( -1.25,0.65)* | Low∮ | 0.19  (-0.30,0.68) | Low |
| Fluoxetine+CBT | vs PLC+MET | — | — | 0.41  (-0.50,1.32) | Very Low∮ | 0.41  (-0.50,1.32) | Very low |
| Fluoxetine+CBT | vs TAU+SP | — | — | 0.24  (-0.49,0.96) | Very Low∮ | 0.24  (-0.49,0.96) | Very low |
| Fluoxetine+CBT | vs PLC+CBT | -0.04  (-0.46,0.39) | Very Low∮⊥* | — | No estimable↑ | 0.23  (-0.70,1.17) | Very low |
| Fluoxetine+CBT | vs TAU+CBT | — | — | 0.00  (-0.72,0.73) | Very Low∮ | 0.00  (-0.72,0.73) | Very low |
| Fluoxetine+CBT | vs TAU+BC | — | — | -0.41  (-1.14,0.32) | Very Low∮ | -0.41  (-1.14,0.32) | Very Low |
| Fluoxetine+CBT | vs CBT | — | — | -0.29  (-0.94,0.37) | Very Low∮ | -0.29  (-0.94,0.37) | Very low |
| Naltrexone+CBT | vs Fluoxetine+CBT | — | — | 0.01  (-0.57,0.60) | Very Low∮ | 0.01  (-0.57,0.60) | Very low |
| Naltrexone+MET | vs Sertraline+CBT | — | — | -0.18  (-0.58,0.22) | Very Low∮ | -0.18  (-0.58,0.22) | Very low |
| Naltrexone+CBT | vs Fluoxetine+CBT | — | — | -0.45  (-1.45,0.56) | Very Low∮ | -0.45  (-1.45,0.56) | Very low |
| Sertraline+CBT | vs Fluoxetine+CBT | — | — | -0.46  (-1.44,0.53) | Very Low∮ | -0.46  (-1.44,0.53) | Very low |
| Naltrexone+MET | vs Fluoxetine+CBT | — | — | -0.64  (-1.55,0.28) | Very Low∮ | -0.64  (-1.55,0.28) | Very low |

**Note:** # Imprecise; * Severe imprecise; ∫ Precise; ^ Direct evidence with medium quality; ∮ Direct evidence with low or very low quality; ⊥ Limitations of research design; ↑ Not estimable because the treatment was not included in the evidence network.

**Abbreviations:** TAU, treatment as usual; SP, supportive psychotherapy; PLC, placebo; CBT, cognitive behavioral therapy; MET, motivation enhancement therapy; BC, brief counseling.

**S12 Table B** Estimates of effect and quality ratings for comparison of psychotherapies for change of craving

(a) Significant network effect of psychotherapy vs TAU, PLC, TAU+PLC, or only medication control

| **Change of craving** | | | | | | | |
| --- | --- | --- | --- | --- | --- | --- | --- |
| **Comparison** | | **Direct evidence** | | **Indirect evidence** | | **Network meta-ananlysis** | |
| **SMD**  **(95% CI)** | **Quality of evidence** | **SMD**  **(95% CI)** | **Quality of evidence** | **SMD**  **(95% CI)** | **Quality of evidence** |
| Significant network effect with **high and moderate** certainty (psychotherapy vs TAU, PLC, TAU+PLC, or only medication control) | | | | | | | |
| — | — | — | — | — | — | — | — |
| Significant network effect with **low and very low** certainty (psychotherapy vs TAU, PLC, TAU+PLC, or only medication control | | | | | | | |
| TAU+PLC | vs TAU | — | — | -0.97  (-1.85,-0.10) | Very Low∮ | -0.97  (-1.85,-0.10) | Very low |

**Note:** # Imprecise; * Severe imprecise; ∫ Precise; ^ Direct evidence with medium quality; ∮ Direct evidence with low or very low quality; ⊥ Limitations of research design; ↑ Not estimable because the treatment was not included in the evidence network.

**Abbreviations:** TAU, treatment as usual; PLC, placebo.

(b) Significant network effect of psychotherapy vs another psychotherapy

| **Change of craving** | | | | | | | |
| --- | --- | --- | --- | --- | --- | --- | --- |
| **Comparison** | | **Direct evidence** | | **Indirect evidence** | | **Network meta-ananlysis** | |
| **SMD**  **(95% CI)** | **Quality of evidence** | **SMD**  **(95% CI)** | **Quality of evidence** | **SMD**  **(95% CI)** | **Quality of evidence** |
| Significant network effect with **high and moderate** certainty (psychotherapy vs another psychotherapy) | | | | | | | |
| — | — | — | — | — | — | — | — |
| Significant network effect with **low and very low** certainty (psychotherapy vs another psychotherapy) | | | | | | | |
| — | — | — | — | — | — | — | — |

**Note:** # Imprecise; * Severe imprecise; ∫ Precise; ^ Direct evidence with medium quality; ∮ Direct evidence with low or very low quality; ⊥ Limitations of research design; ↑ Not estimable because the treatment was not included in the evidence network.

**Abbreviations:** Not applicable.

(c) Insignificant network effect of psychotherapy vs TAU, PLC, TAU+PLC, or only medication control

| **Change of craving** | | | | | | | |
| --- | --- | --- | --- | --- | --- | --- | --- |
| **Comparison** | | **Direct evidence** | | **Indirect evidence** | | **Network meta-ananlysis** | |
| **SMD**  **(95% CI)** | **Quality of evidence** | **SMD**  **(95% CI)** | **Quality of evidence** | **SMD**  **(95% CI)** | **Quality of evidence** |
| Insignificant network effect with **high and moderate** certainty (psychotherapy vs TAU, PLC, TAU+PLC, or only medication control) | | | | | | | |
| TAU+CBT | vs TAU+PLC | 0.67  (-0.02,1.36) | High* | -0.50  (-1.48,0.47) | Very Low∮ | 0.28  (-0.29,0.84) | High |
| CBT | vs TAU | 2.06  (-0.94,5.06) | High* | — | No estimable↑ | -0.43  (-1.09,0.23) | High |
| TAU+CBT | vs TAU | -0.63  (-1.30,0.03) | Moderate^⊥* | 0.54  (-0.45,1.53) | Very Low∮ | -0.70  (-1.56,0.16) | Moderate |
| Insignificant network effect with **low and very low** certainty (psychotherapy vs TAU, PLC, TAU+PLC, or only medication control) | | | | | | | |
| TAU+SP | vs TAU+PLC | 0.01  (-0.46,0.48) | Low∮⊥# | 1.19  (0.09,2.28) | Very Low∮ | 0.19  (-0.24,0.62) | Low |
| TAU+VSTN | vs TAU | 0.37  (-0.42,1.16) | Low∮⊥* | — | No estimable↑ | -0.06  (-1.09,0.97) | Low |
| TAU+SP | vs TAU | -0.12  (-0.65,0.42) | Very Low∮⊥* | -1.29  (-2.36,-0.23) | Low∮ | -0.78  (-1.60,0.03) | Low |
| TAU+VSTN | vs TAU+PLC | — | — | 0.91  (-0.06,1.89) | Very Low∮ | 0.91  (-0.06,1.89) | Very low |
| CBT | vs TAU+PLC | — | — | 0.54  (-0.03,1.11) | Very Low∮ | 0.54  (-0.03,1.11) | Very low |

**Note:** # Imprecise; * Severe imprecise; ∫ Precise; ^ Direct evidence with medium quality; ∮ Direct evidence with low or very low quality; ⊥ Limitations of research design; ↑ Not estimable because the treatment was not included in the evidence network.

**Abbreviations:** TAU, treatment as usual; SP, supportive psychotherapy; PLC, placebo; CBT, cognitive behavioral therapy; VSTN, Visual Short-Time Neurofeedback.

(d) Insignificant network effect of psychotherapy vs another psychotherapy

| **Change of craving** | | | | | | | |
| --- | --- | --- | --- | --- | --- | --- | --- |
| **Comparison** | | **Direct evidence** | | **Indirect evidence** | | **Network meta-ananlysis** | |
| **SMD**  **(95% CI)** | **Quality of evidence** | **SMD**  **(95% CI)** | **Quality of evidence** | **SMD**  **(95% CI)** | **Quality of evidence** |
| Insignificant network effect with **high and moderate** certainty (psychotherapy vs another psychotherapy) | | | | | | | |
| TAU+CBT | vs CBT | — | — | -0.27  (-0.82,0.28) | Moderate^ | -0.27  (-0.82,0.28) | Moderate |
| TAU+VSTN | vs CBT | — | — | 0.37  (-0.42,1.16) | Low∮ | 0.37  (-0.42,1.16) | Low |
| TAU+VSTN | vs TAU+CBT | — | — | 0.64  (-0.33,1.60) | Low∮ | 0.64  (-0.33,1.60) | Low |
| TAU+SP | vs CBT | — | — | -0.35  (-0.83,0.12) | Very Low∮ | -0.35  (-0.83,0.12) | Very low |
| TAU+SP | vs TAU+CBT | — | — | -0.09  (-0.68,0.51) | Very Low∮ | -0.09  (-0.68,0.51) | Very low |
| TAU+SP | vs TAU+VSTN | — | — | -0.72  (-1.65,0.20) | Very Low∮ | -0.72  (-1.65,0.20) | Very low |
| Insignificant network effect with **low and very low** certainty (psychotherapy vs another psychotherapy) | | | | | | | |
| — | — | — | — | — | — | — | — |

**Note:** # Imprecise; * Severe imprecise; ∫ Precise; ^ Direct evidence with medium quality; ∮ Direct evidence with low or very low quality; ⊥ Limitations of research design; ↑ Not estimable because the treatment was not included in the evidence network.

**Abbreviations:** TAU, treatment as usual; SP, supportive psychotherapy; CBT, cognitive behavioral therapy; VSTN, Visual Short-Time Neurofeedback.

**S13. Inconsistency test**

**S13 Figure A** Script results of node splitting of PDA (SMD).


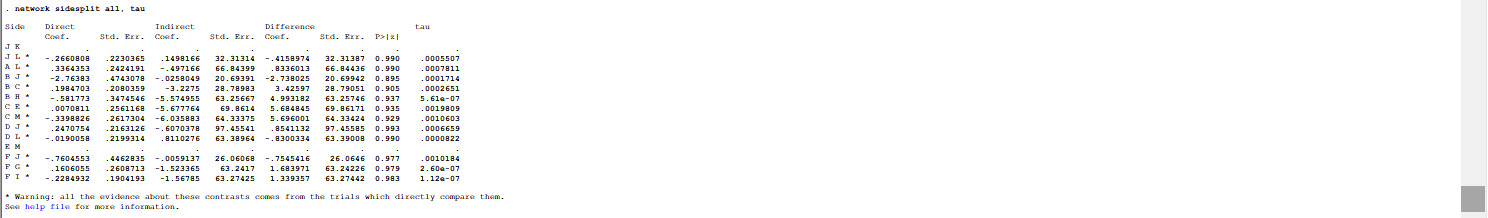


**Note:** A: ART; B: CBT; C: CT; D: MET; E: MET+CT; F: MT; G: MT+RP; H: RT; I: SP; J: TAU; K: TAU+CBT; L: TSF; M: TSF+CT. Because the program runs slowly under the MD condition and can not output the complete node splitting results at one time, the results of direct and indirect comparison of PDA (MD) are sorted into S13 Table A by output separately.

**Abbreviations:** TAU, treatment as usual; SP, supportive psychotherapy; PLC, placebo; CBT, cognitive behavioral therapy; MET, motivation enhancement therapy; TSF, twelve-step facilitation; RT, relaxation therapy; ART, affect regulation training; MT, marital therapy; CT, couple therapy; RP, relapse prevention.

**S13 Figure B** Script results of node splitting of Change of DDD.


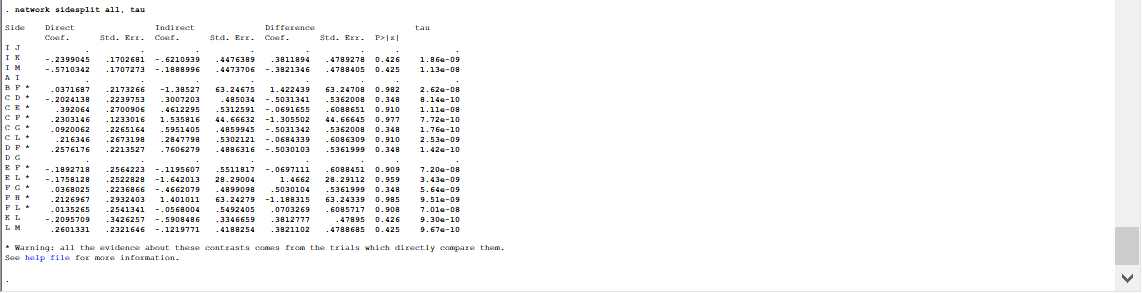


**Note:** A: CBT; B: Fluoxentine+CBT; C: Natrexone+CBT; D: Natrexone+MET; E: Natrexone+TAU; F: PLC+CBT; G: PLC+MET; H: Sertraline+CBT; I:TAU; J: TAU+BC; K: TAU+CBT; L: TAU+PLC; M: TAU+SP.

**Abbreviations:** TAU, treatment as usual; SP, supportive psychotherapy; PLC, placebo; CBT, cognitive behavioral therapy; MET, motivation enhancement therapy; BC, brief counseling.

**S13 Figure C** Script results of node splitting of change of craving.

**
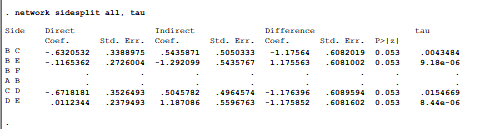
**

**Note:** A: CBT; B(reference): TAU; C: TAU+CBT; D: TAU+PLC; E: TAU+SP; F: TAU+VSTN.

**Abbreviations:** TAU, treatment as usual; SP, supportive psychotherapy; PLC, placebo; CBT, cognitive behavioral therapy; VSTN, Visual Short-Time Neurofeedback.

**S13 Table A** Results of node splitting of PDA (SMD)

| Side | Direct | | Indirect | | Difference | | | tau |
| --- | --- | --- | --- | --- | --- | --- | --- | --- |
| Coef. | Std. Err. | Coef. | Std. Err. | Coef. | Std. Err. | P>z |
| J K | . | . | . | . | . | . | . | . |
| J L * | -0.2660808 | 0.2230365 | 0.1498166 | 32.31314 | -0.4158974 | 32.31387 | 0.99 | 0.0005507 |
| A L * | 0.3364353 | 0.2424191 | -0.497166 | 66.84399 | 0.8336013 | 66.84436 | 0.99 | 0.0007811 |
| B J * | -2.76383 | 0.4743078 | -0.0258049 | 20.69391 | -2.738025 | 20.69942 | 0.895 | 0.0001714 |
| B C * | 0.1984703 | 0.2080359 | -3.2275 | 28.78983 | 3.42597 | 28.79051 | 0.905 | 0.0002651 |
| B H * | -0.581773 | 0.3474546 | -5.574955 | 63.25667 | 4.993182 | 63.25746 | 0.937 | 5.61E-07 |
| C E * | 0.0070811 | 0.2561168 | -5.677764 | 69.8614 | 5.684845 | 69.86171 | 0.935 | 0.0019809 |
| C M * | -0.3398826 | 0.2617304 | -6.035883 | 64.33375 | 5.696001 | 64.33424 | 0.929 | 0.0010603 |
| D J * | 0.2470754 | 0.2163126 | -0.6070378 | 97.45541 | 0.8541132 | 97.45585 | 0.993 | 0.0006659 |
| D L * | -0.0190058 | 0.2199314 | 0.8110276 | 63.38964 | -0.8300334 | 63.39008 | 0.99 | 0.0000822 |
| E M | . | . | . | . | . | . | . | . |
| F J * | -0.7604553 | 0.4462835 | -0.0059137 | 26.06068 | -0.7545416 | 26.0646 | 0.977 | 0.0010184 |
| F G * | 0.1606055 | 0.2608713 | -1.523365 | 63.2417 | 1.683971 | 63.24226 | 0.979 | 2.60E-07 |
| F I * | -0.2284932 | 0.1904193 | -1.56785 | 63.27425 | 1.339357 | 63.27442 | 0.983 | 1.12E-07 |

**Note:** A: ART; B: CBT; C: CT; D: MET; E: MET+CT; F: MT; G: MT+RP; H: RT; I: SP; J: TAU; K: TAU+CBT; L: TSF; M: TSF+CT.

**Abbreviations:** TAU, treatment as usual; SP, supportive psychotherapy; PLC, placebo; CBT, cognitive behavioral therapy; MET, motivation enhancement therapy; TSF, twelve-step facilitation; RT, relaxation therapy; ART, affect regulation training; MT, marital therapy; CT, couple therapy; RP, relapse prevention.

**S13 Table B** Results of node splitting of Change of DDD

| Side | Direct | | Indirect | | Difference | | | tau |
| --- | --- | --- | --- | --- | --- | --- | --- | --- |
| Coef. | Std. Err. | Coef. | Std. Err. | Coef. | Std. Err. | P>z |
| I J | . | . | . | . | . | . | . | . |
| I K | -0.2399045 | 0.1702681 | -0.6210939 | 0.4476389 | 0.3811894 | 0.4789278 | 0.426 | 1.86E-09 |
| I M | -0.5710342 | 0.1707273 | -0.1888996 | 0.4473706 | -0.3821346 | 0.4788405 | 0.425 | 1.13E-08 |
| A I | . | . | . | . | . | . | . |  |
| B F * | 0.0371687 | 0.2173266 | -1.38527 | 63.24675 | 1.422439 | 63.24708 | 0.982 | 2.62E-08 |
| C D * | -0.2024138 | 0.2239753 | 0.3007203 | 0.485034 | -0.5031341 | 0.5362008 | 0.348 | 8.14E-10 |
| C E * | 0.392064 | 0.2700906 | 0.4612295 | 0.5312591 | -0.0691655 | 0.6088651 | 0.91 | 1.11E-08 |
| C F * | 0.2303146 | 0.1233016 | 1.535816 | 44.66632 | -1.305502 | 44.66645 | 0.977 | 7.72E-10 |
| C G * | 0.0920062 | 0.2265164 | 0.5951405 | 0.4859945 | -0.5031342 | 0.5362008 | 0.348 | 1.76E-10 |
| C L * | 0.216346 | 0.2673198 | 0.2847798 | 0.5302121 | -0.0684339 | 0.6086309 | 0.91 | 2.53E-09 |
| D F * | 0.2576176 | 0.2213527 | 0.7606279 | 0.4886316 | -0.5030103 | 0.5361999 | 0.348 | 1.42E-10 |
| D G | . | . | . | . | . | . | . | . |
| E F * | -0.1892718 | 0.2564223 | -0.1195607 | 0.5511817 | -0.0697111 | 0.6088451 | 0.909 | 7.20E-08 |
| E L * | -0.1758128 | 0.2522828 | -1.642013 | 28.29004 | 1.4662 | 28.29112 | 0.959 | 3.43E-09 |
| F G * | 0.0368025 | 0.2236866 | -0.4662079 | 0.4899098 | 0.5030104 | 0.5361999 | 0.348 | 5.64E-09 |
| F H * | 0.2126967 | 0.2932403 | 1.401011 | 63.24279 | -1.188315 | 63.24339 | 0.985 | 9.51E-09 |
| F L * | 0.0135265 | 0.2541341 | -0.0568004 | 0.5492405 | 0.0703269 | 0.6085717 | 0.908 | 7.01E-08 |
| K L | -0.2095709 | 0.3426257 | -0.5908486 | 0.3346659 | 0.3812777 | 0.47895 | 0.426 | 9.30E-10 |
| L M | 0.2601331 | 0.2321646 | -0.1219771 | 0.4188254 | 0.3821102 | 0.4788685 | 0.425 | 9.67E-10 |
| * Warning: all the evidence about these contrasts comes from the trials which directly compare them. | | | | | | | | |

**Note:** A: CBT; B: Fluoxentine+CBT; C: Natrexone+CBT; D: Natrexone+MET; E: Natrexone+TAU; F: PLC+CBT; G: PLC+MET; H: Sertraline+CBT; I:TAU; J: TAU+BC; K: TAU+CBT; L: TAU+PLC; M: TAU+SP.

**Abbreviations:** TAU, treatment as usual; SP, supportive psychotherapy; PLC, placebo; CBT, cognitive behavioral therapy; MET, motivation enhancement therapy; BC, brief counseling.

**S13 Table C** Results of node splitting of change of craving

|  | Direct | | Indirect | | Difference | | | tau |
| --- | --- | --- | --- | --- | --- | --- | --- | --- |
| Coef. | Std. Err. | Coef. | Std. Err. | Coef. | Std. Err. | P>z |
| B C | -0.6320532 | 0.3388975 | 0.5435871 | 0.5050333 | -1.17564 | 0.6082019 | 0.053 | 0.0043484 |
| B E | -0.1165362 | 0.2726004 | -1.292099 | 0.5435767 | 1.175563 | 0.6081002 | 0.053 | 9.18E-06 |
| B F | . | . | . | . | . | . | . | . |
| A B | . | . | . | . | . | . | . | . |
| C D | -0.6718181 | 0.3526493 | 0.5045782 | 0.4964574 | -1.176396 | 0.6089594 | 0.053 | 0.0154669 |
| D E | 0.0112344 | 0.2379493 | 1.187086 | 0.5596763 | -1.175852 | 0.6081602 | 0.053 | 8.44E-06 |

**Note:**A: CBT; B(reference): TAU; C: TAU+CBT; D: TAU+PLC; E: TAU+SP; F: TAU+VSTN.

**Abbreviations:** TAU, treatment as usual; SP, supportive psychotherapy; PLC, placebo; CBT, cognitive behavioral therapy; VSTN, Visual Short-Time Neurofeedback.

**S14. Small-study effects (funnel plots)**

**S14 Figure A** Funnel plot for publication bias for PDA.


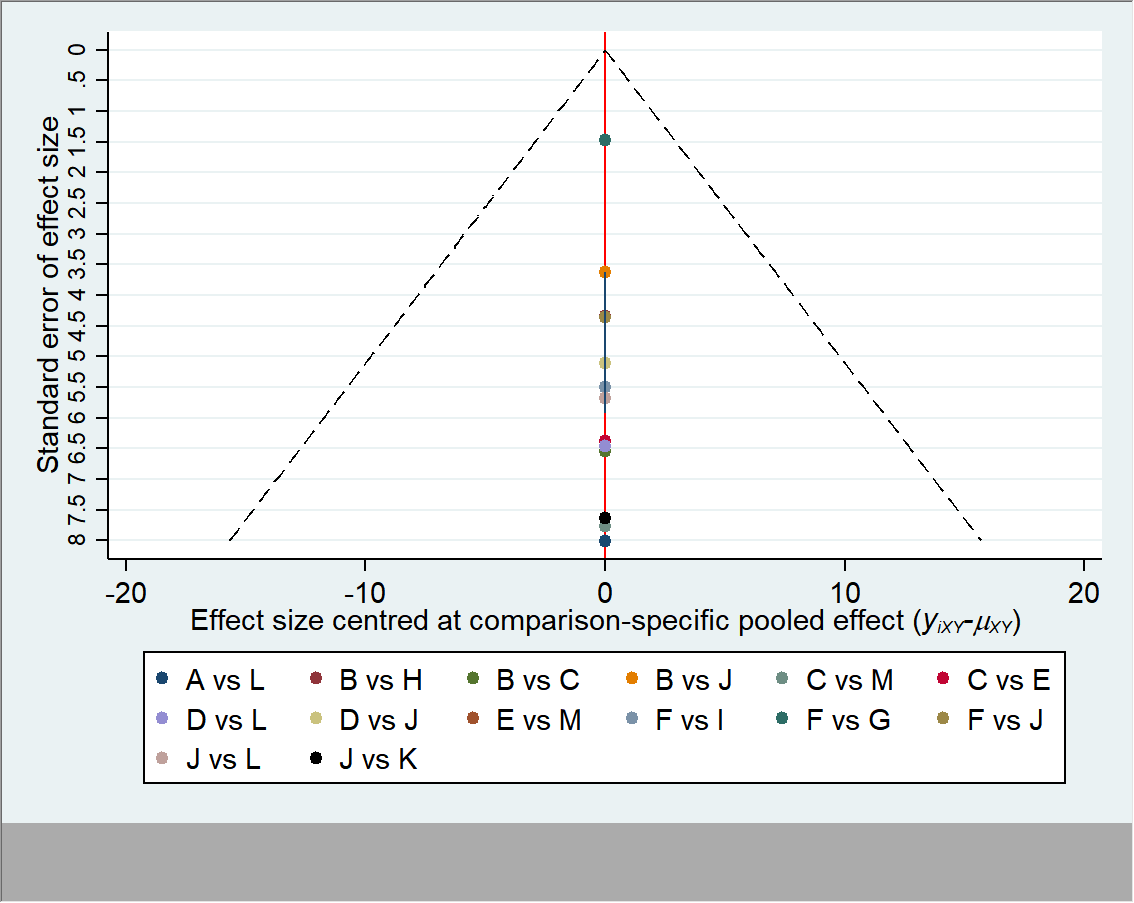


**Note:** A: ART; B: CBT; C: CT; D: MET; E: MET+CT; F: MT; G: MT+RP; H: RT; I: SP; J: TAU; K: TAU+CBT; L: TSF; M: TSF+CT.

**Abbreviations:** TAU, treatment as usual; SP, supportive psychotherapy; PLC, placebo; CBT, cognitive behavioral therapy; MET, motivation enhancement therapy; TSF, twelve-step facilitation; RT, relaxation therapy; ART, affect regulation training; MT, marital therapy; CT, couple therapy; RP, relapse prevention.

**S14 Figure B** Funnel plot for publication bias of change of DDD.


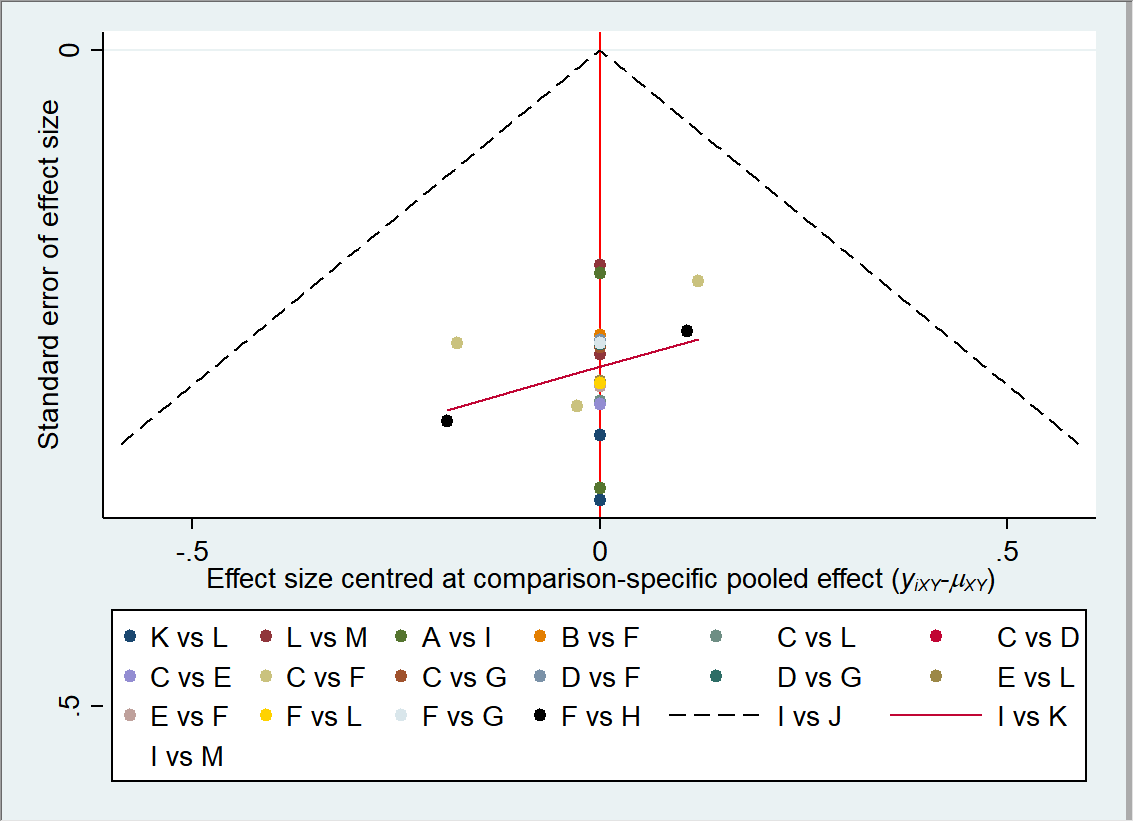


**Note:** A: CBT; B: Fluoxentine+CBT; C: Natrexone+CBT; D: Natrexone+MET; E: Natrexone+TAU; F: PLC+CBT; G: PLC+MET; H: Sertraline+CBT; I:TAU; J: TAU+BC; K: TAU+CBT; L: TAU+PLC; M: TAU+SP.

**Abbreviations:** TAU, treatment as usual; SP, supportive psychotherapy; PLC, placebo; CBT, cognitive behavioral therapy; MET, motivation enhancement therapy; BC, brief counseling.

**S14 Figure C** Funnel plot for publication bias for change of craving.


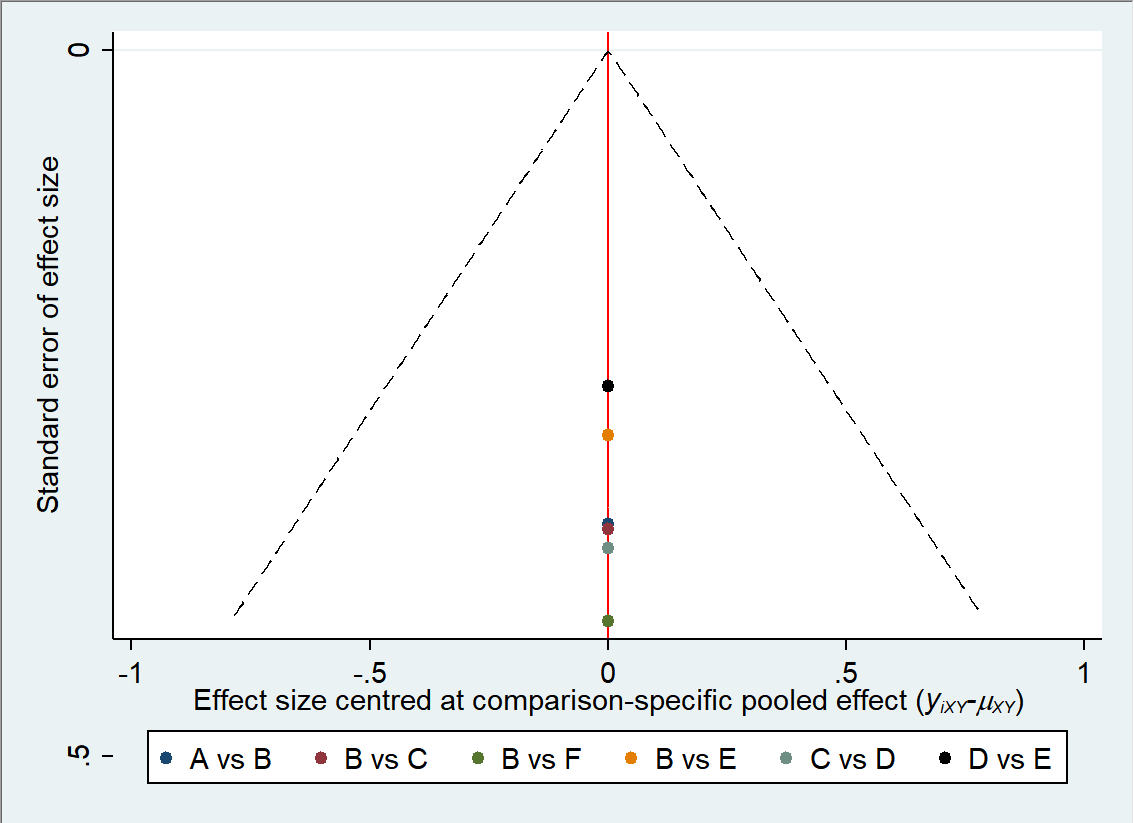


**Note:** A: CBT; B (reference): TAU; C: TAU+CBT; D: TAU+PLC; E: TAU+SP; F: TAU+VSTN.

**Abbreviations:** TAU, treatment as usual; SP, supportive psychotherapy; PLC, placebo; CBT, cognitive behavioral therapy; VSTN, Visual Short-Time Neurofeedback.

**Reference**

1. Roberts MT, Shokraneh F, Sun Y, Groom M, Adams CE. Classification of Psychotherapy Interventions for People with Schizophrenia: Development of the Nottingham Classification of Psychotherapies. *Evidence-Based Mental Health.* 2021; 24(2): 62-69. doi:10.1101/2020.07.30.20164913
2. Epstein EE, McCrady BS. *A Cognitive-Behavioral Treatment Program for Overcoming Alcohol Problems: Therapist Guide*. Oxford University Press; 2009. Available from: <http://dx.doi.org/10.1093/med:psych/9780195322811.001.0001.>
3. Kadden, R. M., Carroll, K., Donovan, D., et al, Eds. *Cognitive-behavioral coping skills therapy manual: A clinical research guide for therapists treating individuals with alcohol abuse and dependence*. National Institute on Alcohol Abuse and Alcoholism. Rockville, MD; 1992.
4. Monti, P. M., Abrams, D. B., Kadden, R. M., Cooney, N. L. *Treating alcohol dependence: A coping skills training guide*. New York, NY: Guilford Press; 2002.
5. Miller WR, Rollnick S. *Motivational Interviewing*. Lambertus, Freiburg; 2015.
6. Block, I.; Loeber, S. Evidence-based psychotherapy of addictive disorders. *Der Nervenarzt.* 2018; 89: 3. doi:10.1007/s00115-018-0483-7
7. Freyberger, H., & Freyberger, H. J. Supportive psychotherapy. *Psychotherapy and psychosomatics*. 1994; 61(3-4), 132-142. https://doi.org/10.1159/000288881
8. McCrady, B. S., Wilson, A. D., Muñoz, R. E., Fink, B. C., Fokas, K., & Borders, A. Alcohol-Focused Behavioral Couple Therapy. *Family process.* 2016; 55(3), 443-459. https://doi.org/10.1111/famp.12231
9. Johnson S. M. Marital therapy: issues and challenges. *Journal of psychiatry & neuroscience.* 1991; 16(3): 176-181.
10. Ferri M, Amato L, Davoli M. Alcoholics Anonymous and other 12-step programmes for alcohol dependence. *Cochrane database Syst Rev*. 2006;(3):CD005032. doi:10.1002/14651858.CD005032.pub2
11. Loeber S, Mann K. Development of an evi-Mind-Based Psychotherapy for Alcoholism. An overview. *Neurologist*. 2006; 77: 558-566.
12. Walitzer, K. S., Deffenbacher, J. L., & Shyhalla, K. Alcohol-Adapted Anger Management Treatment: A Randomized Controlled Trial of an Innovative Therapy for Alcohol Dependence. *Journal of substance abuse treatment*. 2015; 59: 83-93. <https://doi-org.ezproxy3.lhl.uab.edu/10.1016/j.jsat.2015.08.003>
13. Kabat-Zinn J. *Wherever You Go, There You Are: Mindfulness Meditation in Everyday Life.* UK, Hachette; 2009.
14. Bishop SR, Lau M, Shapiro S, et al. Mindfulness: a proposed operational definition. *Clin Psychol Sci Pract*. 2004; 11: 230-241.
15. Shapiro SL, Brown KW, Biegel GM. Teaching self-care to caregivers: effects of mindfulness-based stress reduction on the mental health of therapists in training. *Train Educ Prof Psychol*. 2007; 1: 105-115.
16. Peniston, E. G., Kulkosky, P. J. Alpha-theta brainwave training and beta-endorphin levels in alcoholics. *Alcoholism, clinical and experimental research*. 1989; 13(2): 271-279. <https://doi.org/10.1111/j.1530-0277.1989.tb00325.x.>
17. Angelakis, E., Stathopoulou, S., Frymiare, J. L., Green, D. L., Lubar, J. F., Kounios, J. EEG neurofeedback: a brief overview and an example of peak alpha frequency training for cognitive enhancement in the elderly. *The Clinical neuropsychologist.* 2007; 21(1): 110-129. https://doi.org/10.1080/13854040600744839
18. Zhao Min, Hao Wei, Li Jing. Non-drug treatment of alcohol-related disorders. *Chinese Journal of Drug Abuse Prevention and Treatment*. 2018; (02): 63-65. doi:10.15900/j.cnki.zylf1995.2018.02.001.
19. Wiers, C. E., Stelzel, C., Gladwin, T. E., et al. Effects of cognitive bias modification training on neural alcohol cue reactivity in alcohol dependence. *The American journal of psychiatry*. 2015; 172(4): 335-343. <https://doi-org.ezproxy3.lhl.uab.edu/10.1176/appi.ajp.2014.13111495>
20. Agyapong, V. I., Ahern, S., McLoughlin, D. M., Farren, C. K. Supportive text messaging for depression and comorbid alcohol use disorder: single-blind randomised trial. *Journal of affective disorders.* 2012; 141(2-3): 168-176. <https://doi-org.ezproxy3.lhl.uab.edu/10.1016/j.jad.2012.02.040>
21. Anton, R. F., Moak, D. H., Waid, L. R., Latham, P. K., Malcolm, R. J., & Dias, J. K. Naltrexone and cognitive behavioral therapy for the treatment of outpatient alcoholics: results of a placebo-controlled trial. *The American journal of psychiatry*. 1999; 156(11): 1758–1764. <https://doi-org.ezproxy3.lhl.uab.edu/10.1176/ajp.156.11.1758>
22. Anton, R. F., Moak, D. H., Latham, P., et al. Naltrexone combined with either cognitive behavioral or motivational enhancement therapy for alcohol dependence. *Journal of clinical psychopharmacology*. 2005; 25(4): 349-357. <https://doi-org.ezproxy3.lhl.uab.edu/10.1097/01.jcp.0000172071.81258.04>
23. Balldin, J., Berglund, M., Borg, S., et al. A 6-month controlled naltrexone study: combined effect with cognitive behavioral therapy in outpatient treatment of alcohol dependence. *Alcoholism, clinical and experimental research*. 2003: 27(7): 1142-1149. <https://doi-org.ezproxy3.lhl.uab.edu/10.1097/01.ALC.0000075548.83053.A9>
24. Blondell, R. D., Frydrych, L. M., Jaanimagi, U., et al. A randomized trial of two behavioral interventions to improve outcomes following inpatient detoxification for alcohol dependence. *Journal of addictive diseases*. 2011; 30(2): 136-148. <https://doi-org.ezproxy3.lhl.uab.edu/10.1080/10550887.2011.554777>
25. Brown, R. A., Evans, D. M., Miller, I. W., Burgess, E. S., Mueller, T. I. Cognitive-behavioral treatment for depression in alcoholism. *Journal of consulting and clinical psychology*. 1997; 65(5): 715-726. [https://doi-org.ezproxy3.lhl.uab.edu/10.1037//0022-006x.65.5.715](https://doi-org.ezproxy3.lhl.uab.edu/10.1037/0022-006x.65.5.715)
26. Cucciare, M. A., Weingardt, K. R., Ghaus, S., Boden, M. T., Frayne, S. M. A randomized controlled trial of a web-delivered brief alcohol intervention in Veterans Affairs primary care. *Journal of studies on alcohol and drugs*. 2013; 74(3): 428-436. <https://doi-org.ezproxy3.lhl.uab.edu/10.15288/jsad.2013.74.428>
27. Davidson, D., Gulliver, S. B., Longabaugh, R., Wirtz, P. W., Swift, R. Building better cognitive-behavioral therapy: is broad-spectrum treatment more effective than motivational-enhancement therapy for alcohol-dependent patients treated with naltrexone?. *Journal of studies on alcohol and drugs*. 2007; 68(2): 238-247. <https://doi-org.ezproxy3.lhl.uab.edu/10.15288/jsad.2007.68.238>
28. Garland, E. L., Gaylord, S. A., Boettiger, C. A., Howard, M. O. Mindfulness training modifies cognitive, affective, and physiological mechanisms implicated in alcohol dependence: results of a randomized controlled pilot trial. *Journal of psychoactive drugs*. 2010; 42(2): 177-192. <https://doi-org.ezproxy3.lhl.uab.edu/10.1080/02791072.2010.10400690>
29. Foa, E. B., Yusko, D. A., McLean, C. P., et al. Concurrent naltrexone and prolonged exposure therapy for patients with comorbid alcohol dependence and PTSD: a randomized clinical trial. *JAMA*. 2013; 310(5): 488-495. <https://doi-org.ezproxy3.lhl.uab.edu/10.1001/jama.2013.8268>
30. Farren, C. K., Milnes, J., Lambe, K., Ahern, S. Computerised cognitive behavioural therapy for alcohol use disorder: a pilot randomised control trial. *Irish journal of psychological medicine*. 2015; 32(3): 237-246. <https://doi-org.ezproxy3.lhl.uab.edu/10.1017/ipm.2014.64>
31. Hien, D. A., Levin, F. R., Ruglass, L. M., et al. Combining seeking safety with sertraline for PTSD and alcohol use disorders: A randomized controlled trial. *Journal of consulting and clinical psychology*. 2015； 83(2): 359-369. <https://doi-org.ezproxy3.lhl.uab.edu/10.1037/a0038719>
32. Kiluk, B. D., Devore, K. A., Buck, M. B., et al. Randomized Trial of Computerized Cognitive Behavioral Therapy for Alcohol Use Disorders: Efficacy as a Virtual Stand-Alone and Treatment Add-On Compared with Standard Outpatient Treatment. *Alcoholism, clinical and experimental research*. 2016; 40(9): 1991-2000. <https://doi-org.ezproxy3.lhl.uab.edu/10.1111/acer.13162>
33. Kranzler, H. R., Burleson, J. A., Korner, P., et al. Placebo-controlled trial of fluoxetine as an adjunct to relapse prevention in alcoholics. *The American journal of psychiatry*. 1995; 152(3): 391-397. <https://doi-org.ezproxy3.lhl.uab.edu/10.1176/ajp.152.3.391>
34. Lackner, N., Unterrainer, H. F., Skliris, D., et al. The Effectiveness of Visual Short-Time Neurofeedback on Brain Activity and Clinical Characteristics in Alcohol Use Disorders: Practical Issues and Results. *Clinical EEG and neuroscience*. 2016; 47(3): 188-195. <https://doi-org.ezproxy3.lhl.uab.edu/10.1177/1550059415605686>
35. Lucht, M. J., Hoffman, L., Haug, S., et al. A surveillance tool using mobile phone short message service to reduce alcohol consumption among alcohol-dependent patients. *Alcoholism, clinical and experimental research*. 2014; 38(6): 1728-1736. <https://doi-org.ezproxy3.lhl.uab.edu/10.1111/acer.12403>
36. Markowitz, J. C., Kocsis, J. H., Christos, P., Bleiberg, K., & Carlin, A. Pilot study of interpersonal psychotherapy versus supportive psychotherapy for dysthymic patients with secondary alcohol abuse or dependence. *The Journal of nervous and mental disease*. 2008; 196(6): 468-474. <https://doi-org.ezproxy3.lhl.uab.edu/10.1097/NMD.0b013e31817738f1>
37. Meshesha, L. Z., Soltis, K. E., Wise, E. A., Rohsenow, D. J., Witkiewitz, K., Murphy, J. G. Pilot trial investigating a brief behavioral economic intervention as an adjunctive treatment for alcohol use disorder. *Journal of substance abuse treatment*. 2020; 113: 108002. <https://doi-org.ezproxy3.lhl.uab.edu/10.1016/j.jsat.2020.108002>
38. McCrady, B. S., Epstein, E. E., Cook, S., Jensen, N., Hildebrandt, T. A randomized trial of individual and couple behavioral alcohol treatment for women. *Journal of consulting and clinical psychology*. 2009; 77(2): 243-256. <https://doi-org.ezproxy3.lhl.uab.edu/10.1037/a0014686>
39. McCrady, B. S., Epstein, E. E., Hirsch, L. S. Maintaining change after conjoint behavioral alcohol treatment for men: outcomes at 6 months. *Addiction (Abingdon, England)*. 1999; 94(9): 1381-1396. <https://doi-org.ezproxy3.lhl.uab.edu/10.1046/j.1360-0443.1999.949138110.x>
40. O'Farrell, T. J., Choquette, K. A., Cutter, H. S., Brown, E. D., McCourt, W. F. Behavioral marital therapy with and without additional couples relapse prevention sessions for alcoholics and their wives. *Journal of studies on alcohol.* 1993; 54(6): 652-666. <https://doi-org.ezproxy3.lhl.uab.edu/10.15288/jsa.1993.54.652>
41. O'Farrell, T. J., Cutter, H. S., Choquette, K. A., Floyd, F. J., Bayog, R. D. Behavioral marital therapy for male alcoholics: Marital and drinking adjustment during the two years after treatment. *Behavior Therapy*. 1992; 23(4): 529-549.
42. Zweben, A., Pearlman, S., Li, S. A comparison of brief advice and conjoint therapy in the treatment of alcohol abuse: the results of the Marital Systems Study. *British journal of addiction*. 1988; 83(8): 899-916. <https://doi-org.ezproxy3.lhl.uab.edu/10.1111/j.1360-0443.1988.tb01583.x>
43. Ponizovsky, A. M., Rosca, P., Aronovich, E., Weizman, A., Grinshpoon, A. Baclofen as add-on to standard psychosocial treatment for alcohol dependence: a randomized, double-blind, placebo-controlled trial with 1 year follow-up. *Journal of substance abuse treatment*. 2015; 52: 24-30. <https://doi-org.ezproxy3.lhl.uab.edu/10.1016/j.jsat.2014.11.007>
44. Rose, G. L., Skelly, J. M., Badger, G. J., Ferraro, T. A., Helzer, J. E. Efficacy of automated telephone continuing care following outpatient therapy for alcohol dependence. *Addictive behaviors.* 2015; 41: 223-231. <https://doi-org.ezproxy3.lhl.uab.edu/10.1016/j.addbeh.2014.10.022>
45. Rupp, C. I., Kemmler, G., Kurz, M., Hinterhuber, H., Fleischhacker, W. W. Cognitive remediation therapy during treatment for alcohol dependence. *Journal of studies on alcohol and drugs*. 2012; 73(4): 625-634. <https://doi-org.ezproxy3.lhl.uab.edu/10.15288/jsad.2012.73.625>
46. Nadkarni, A., Weiss, H. A., Velleman, R., et al. Feasibility, acceptability and cost-effectiveness of a brief, lay counsellor-delivered psychological treatment for men with alcohol dependence in primary care: an exploratory randomized controlled trial. *Addiction (Abingdon, England)*. 2019; 114(7): 1192-1203. <https://doi-org.ezproxy3.lhl.uab.edu/10.1111/add.14630>
47. Morley, K. C., Baillie, A., Leung, S., Sannibale, C., Teesson, M., Haber, P. S. Is Specialized Integrated Treatment for Comorbid Anxiety, Depression and Alcohol Dependence Better than Treatment as Usual in a Public Hospital Setting?. *Alcohol and alcoholism (Oxford, Oxfordshire)*. 2016; 51(4): 402-409. <https://doi-org.ezproxy3.lhl.uab.edu/10.1093/alcalc/agv131>
48. Nosen, E., Littlefield, A. K., Schumacher, J. A., Stasiewicz, P. R., Coffey, S. F. Treatment of co-occurring PTSD-AUD: effects of exposure-based and non-trauma focused psychotherapy on alcohol and trauma cue-reactivity. *Behaviour research and therapy*. 2014; 61: 35-42. <https://doi-org.ezproxy3.lhl.uab.edu/10.1016/j.brat.2014.07.003>
49. O'Reilly, H., Hagerty, A., O'Donnell, S., et al. Alcohol Use Disorder and Comorbid Depression: A Randomized Controlled Trial Investigating the Effectiveness of Supportive Text Messages in Aiding Recovery. *Alcohol and alcoholism (Oxford, Oxfordshire)*. 2019; 54(5): 551-558. <https://doi-org.ezproxy3.lhl.uab.edu/10.1093/alcalc/agz060>
50. Schneider, B. C., Moritz, S., Hottenrott, B., Reimer, J., Andreou, C., Jelinek, L. Association Splitting: A randomized controlled trial of a new method to reduce craving among inpatients with alcohol dependence. *Psychiatry research*. 2016; 238: 310–317. <https://doi-org.ezproxy3.lhl.uab.edu/10.1016/j.psychres.2016.02.051>
51. Sannibale, C., Teesson, M., Creamer, M., et al. Randomized controlled trial of cognitive behaviour therapy for comorbid post-traumatic stress disorder and alcohol use disorders. *Addiction (Abingdon, England)*.2013; 108(8): 1397-1410. <https://doi-org.ezproxy3.lhl.uab.edu/10.1111/add.12167>
52. Skinner HA, Sheu WJ. Reliability of alcohol use indices. The LDH and the MAST. *J Stud Alcohol*. 1982; 43: 1157-70.
53. Sobell L. C., Sobell M. B. Alcohol Timeline Followback Users’ Manual. *Addiction Research Foundation*. 1995.
54. Sobell, M.B., Sobell, L.C. Portraying alcohol treatment outcomes: Different yardsticks of success. *Behavior Therapy.* 1995; 26: 643-669.
55. Sobell, L. C., Sobell, M. B. *Timeline followback user’s guide: A calendar method for assessing alcohol and drug use*. Toronto: Addiction Research Foundation; 1996.
56. Sobell, M. B., Cooper, A. M., Maisto, S. A., Cooper, T. C., Sobell, L. C., Sanders, B. Developing a prototype for evaluating alcohol treatment effectiveness - sciencedirect. *Evaluating Alcohol & Drug Abuse Treatment Effectiveness*. 1980; 129-150.
57. Sobell, L.C., Sobell, M.B. Timeline follow-back: a technique for assessing self-reported ethanol consumption. In: Allen, J., Litten, R.Z. (Eds.), *Measuring Alcohol Consumption: Psychosocial and Biological Methods*. Humana Press, Totowa, NJ; 1992: 41-72.
58. Sobell L, Sobell M, Leo G, Cancill A. Reliability of a timeline method: assessing normal drinker reports of recent drinking and a comparative evaluation across several populations. *British Journal of Addiction*. 1988; 83: 393-402.
59. Miller WR, Del Boca FK. Measurement of drinking behavior using the Form 90 family of instruments. *J Stud Alcohol Suppl*. 1994; 12:112-118.
60. Miller, W. *Form 90: A Structured Assessment Interview for Drinking and Related Behaviors: Test Manual*. National Institute on Alcohol Abuse and Alcoholism. Rockville, MD; 1996.
61. Sobell, L. C, Maisto, S. A., Sobell, M. B. et al. Reliability of alcohol abusers' self-reports of drinking behaviour. *Behaviour Research and Therapy*. 1979; 157-160.
62. Sobell, M.B., Sobell, L.C., Klajner, F., Pavan, D., Basian, E.The reliability of a timeline method for assessing normal drinker college students’ recent drinking history: Utility for alcohol research. *Addict. Behav*. 1986; 11: 149-161.
63. Fals-Stewart W, O’ Farrell TJ, Freitas TT, McFarlin SK, Rutigliano P. The timeline followback reports of psychoactive substance use by drug-abusing patients: psychometricproperties. *J Consult Clin Psychol*. 2000; 68: 134-44.
64. O' Farrell, T. J., Langenbucher, J. Time-line drinking behavior interview. In M. Hersen, A. Bellack (Eds.), *Dictionary of behavioral assessment techniques*. New York: Pergamon Press; 1988: 477-479.
65. Love A, James D, Willner P. A comparison of two alcohol craving questionnaires. *Addiction*. 1998; 93: 1091-1102.
66. Mann, K., Ackermann, K. The OCDS-G : psychometric characteristics of the German version of the Obsessive Compulsive Drinking Scale. *Sucht.* 2000; 46: 90-100.
67. Anton RF, Moak DH, Latham PK. The obsessive compulsive drinking scale: a new method of assessing outcome in alcoholism treatment studies. *Arch Gen Psychiatry*. 1996; 53: 225-231.
68. Anton RF, M.D., Latham, P. The obsessive compulsive drinking scale: a self-rated instrument for the quantification of thoughts about alcohol and drinking behavior. *Alcoholism, Clinical and Experimental Research*. 1995; 19: 92-99.
69. Kozlowski, L. T., Pillitteri, J. L., Sweeney, C. T., Whitfield, K. E., Graham, J. W. Asking questions about urges or cravings for cigarettes. *Psychology of Addictive Behaviors*. 1996; 10: 248-260.
70. Raabe A, Grüsser SM, Wessa M, Podschus J, Flor H. The assessment of craving: psychometric properties, factor structure and a revised version of the Alcohol Craving Questionnaire (ACQ). *Addiction*. 2005; 100: 227-234.
71. Flannery BA, Volpicelli JR, Pettinati HM. Psychometric properties of the Penn Alcohol Craving Scale. *Alcohol Clin Exp Res*. 1999; 23(8):1289-1295.
72. Flannery. B.A.; Roberts, A.J.; Cooney, N.; Swift. R.M.; Anton, R.F. Rohsenow, D .J. The role of craving in alcohol use, dependence, and treatment. *Alcoholism: Clinical and Experimental Research*. 2001; 25(2): 299-308.
73. Puhan MA, Schünemann HJ, Murad MH, et al. A GRADE Working Group approach for rating the quality of treatment effect estimates from network meta-analysis. *BMJ*. 2014;349. doi:https://doi.org/10.1136/bmj.g5630
74. Guyatt G, Oxman AD, Akl EA, et al. GRADE guidelines: 1. Introduction—GRADE evidence profiles and summary of findings tables. *J Clin Epidemiol*. 2011;64(4):383-394. doi: https://doi.org/10.1016/j.jclinepi.2010.04.026
75. Guyatt GH, Oxman AD, Kunz R, et al. GRADE guidelines: 2. Framing the question and deciding on important outcomes. *J Clin Epidemiol*. 2011;64(4):395-400.
76. Balshem H, Helfand M, Schünemann HJ, et al. GRADE guidelines: 3. Rating the quality of evidence. *J Clin Epidemiol*. 2011;64(4):401-406.
77. Guyatt GH, Oxman AD, Vist G, et al. GRADE guidelines: 4. Rating the quality of evidence—study limitations (risk of bias). *J Clin Epidemiol*. 2011;64(4):407-415.
78. Guyatt GH, Oxman AD, Montori V, et al. GRADE guidelines: 5. Rating the quality of evidence—publication bias. *J Clin Epidemiol*. 2011;64(12):1277-1282.
79. Guyatt GH, Oxman AD, Kunz R, et al. GRADE guidelines 6. Rating the quality of evidence—imprecision. *J Clin Epidemiol*. 2011;64(12):1283-1293. doi: https://doi.org/10.1016/j.jclinepi.2011.01.012
80. Guyatt GH, Oxman AD, Kunz R, et al. GRADE guidelines: 7. Rating the quality of evidence—inconsistency. *J Clin Epidemiol*. 2011;64(12):1294-1302.
81. Guyatt GH, Oxman AD, Kunz R, et al. GRADE guidelines: 8. Rating the quality of evidence—indirectness. *J Clin Epidemiol*. 2011;64(12):1303-1310.
82. Guyatt GH, Oxman AD, Sultan S, et al. GRADE guidelines: 9. Rating up the quality of evidence. *J Clin Epidemiol*. 2011;64(12):1311-1316.
